# Supplementary material for: Total synthesis of epothilones using functionalised allylstannanes for remote stereocontrol
Source: Royal Society of Chemistry journal article supplement (doi:10.1039/c2ob26310f), 2012-01-01

19M014  
STANDARD 1H OBSERVE

Solvent: CDCl3  
Ambient temperature  
Sample #43  
File: 4301  
Acq name Feb19a  
Date Feb 15 98  
NOVA-300 "abhas"  
PULSE SEQUENCE  
PRG: zgpg30 3.300 sec  
PULPROG: zgpg30  
AQ: 0.52000000  
RG: 327.6841 sec  
AQ: 1.10000000  
RG: 327.6841 sec  
SFO: 500.137089 MHz  
WDW: EM  
SSB: 0  
GB: 0  
PC: 1.00000000  
RESERVE: H1 269.8455152 MHz  
DATA PROCESSING  
Line broadening 0.3 Hz  
FT SIZE 65535  
\*Total time 1 minutes

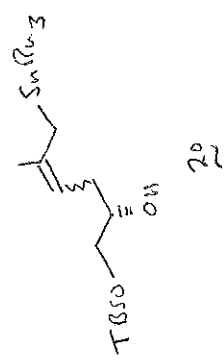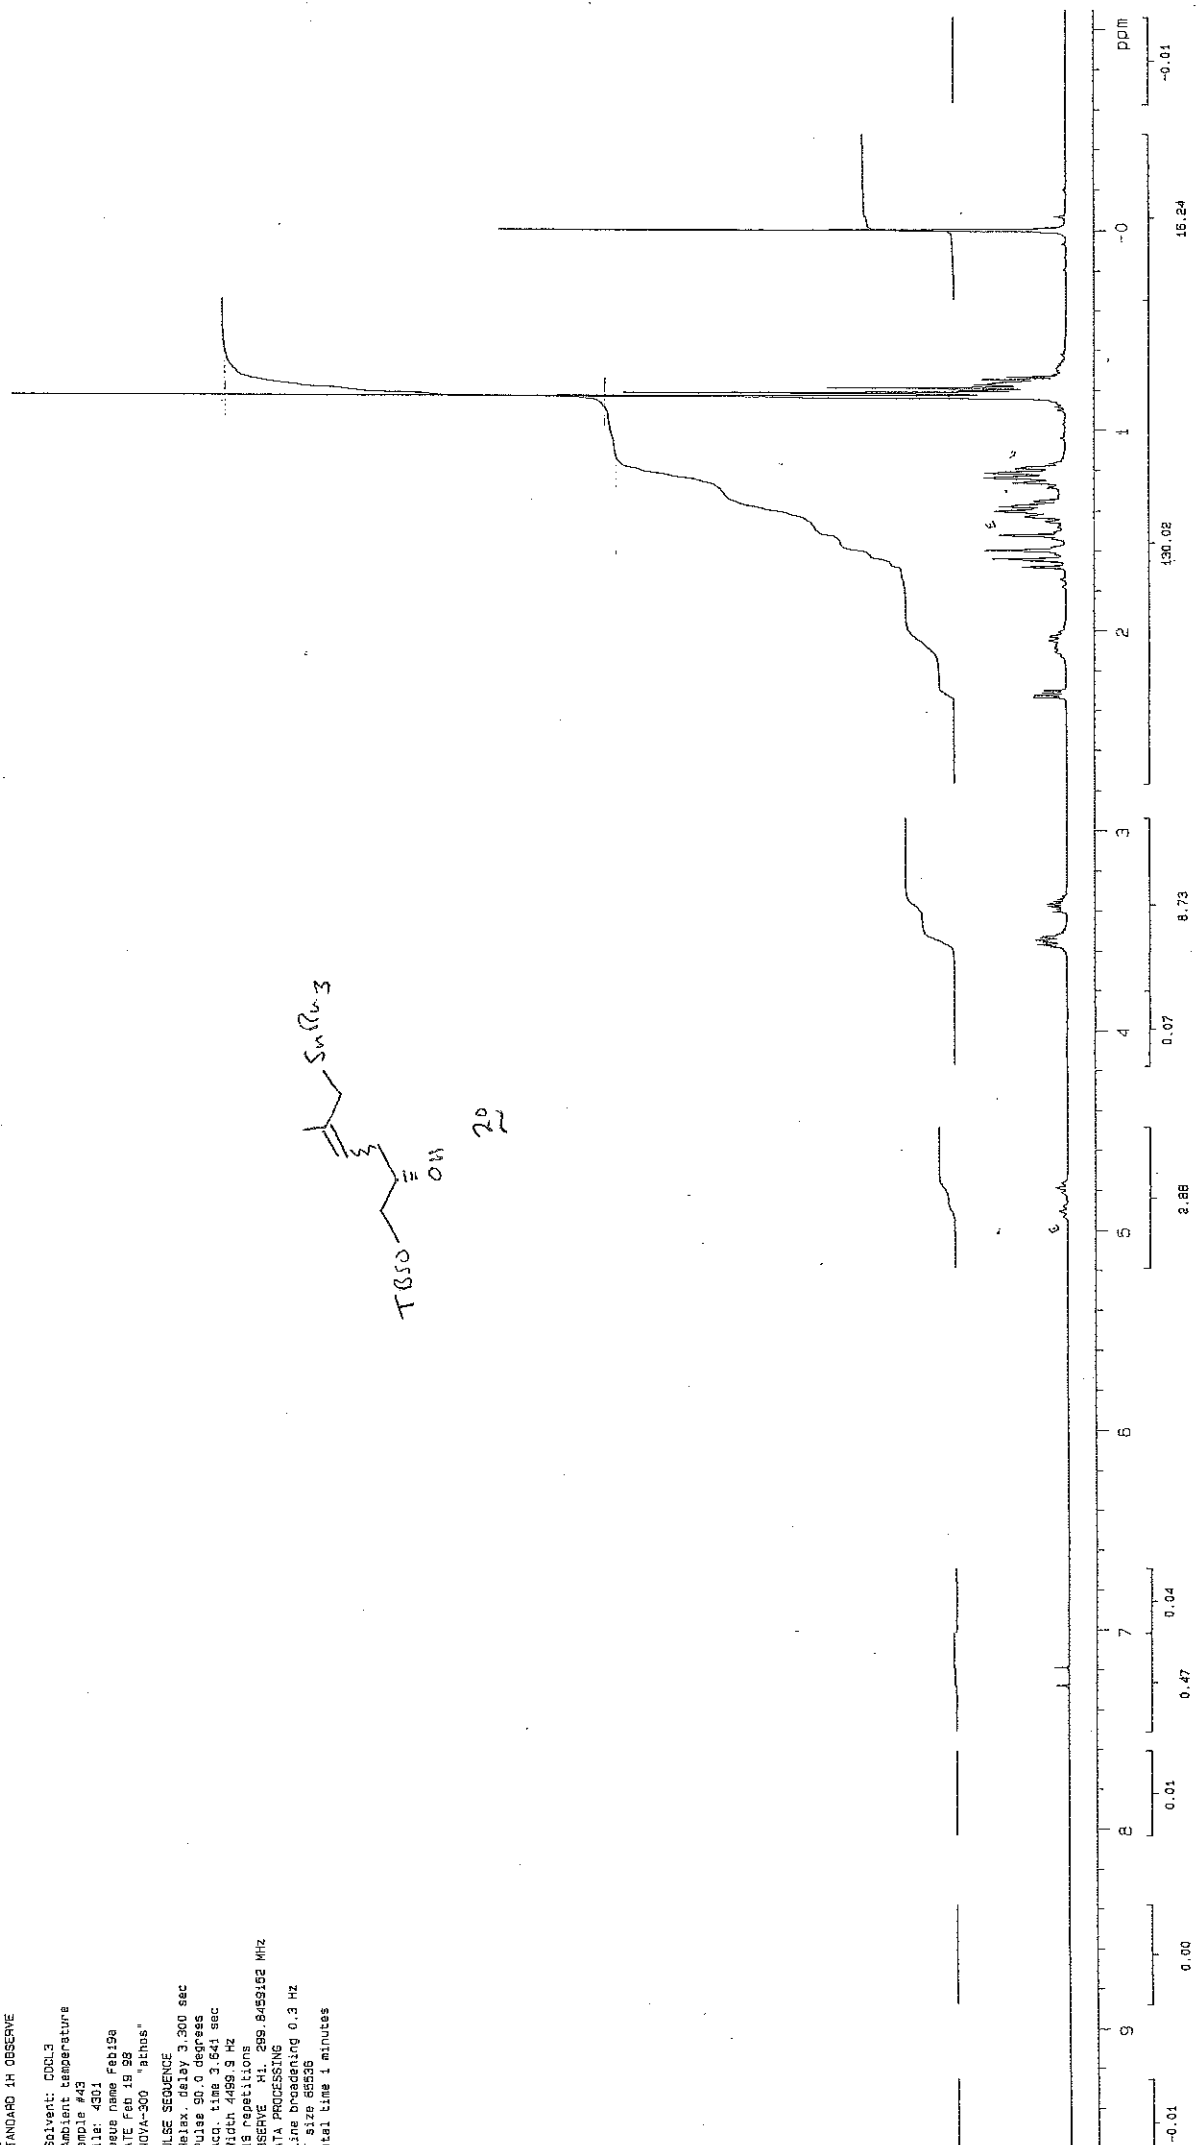

NGM014  
 STANDARD 1H OBSERVE

Solvent: CDCl<sub>3</sub>  
 Ambient temperature  
 Sample #12  
 File: 1202  
 Queue name: Feb25C  
 Date: Feb 25 '08  
 INOVA-500 "athos"

PULSE SEQUENCE  
 Pulse: 45.0 degrees  
 Acq. time: 1.539 sec  
 Width: 20000.0 Hz  
 80 repetitions  
 OBSERVE: C13, 75.3963141 MHz  
 DECOUPLE: H1, 299.8473785 MHz  
 Power: 40 dB  
 continuously on

WALTZ-16 modulated  
 DATA PROCESSING  
 Line broadening: 1.0 Hz  
 FT size: 65536  
 Total time: 2 minutes

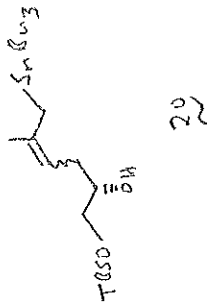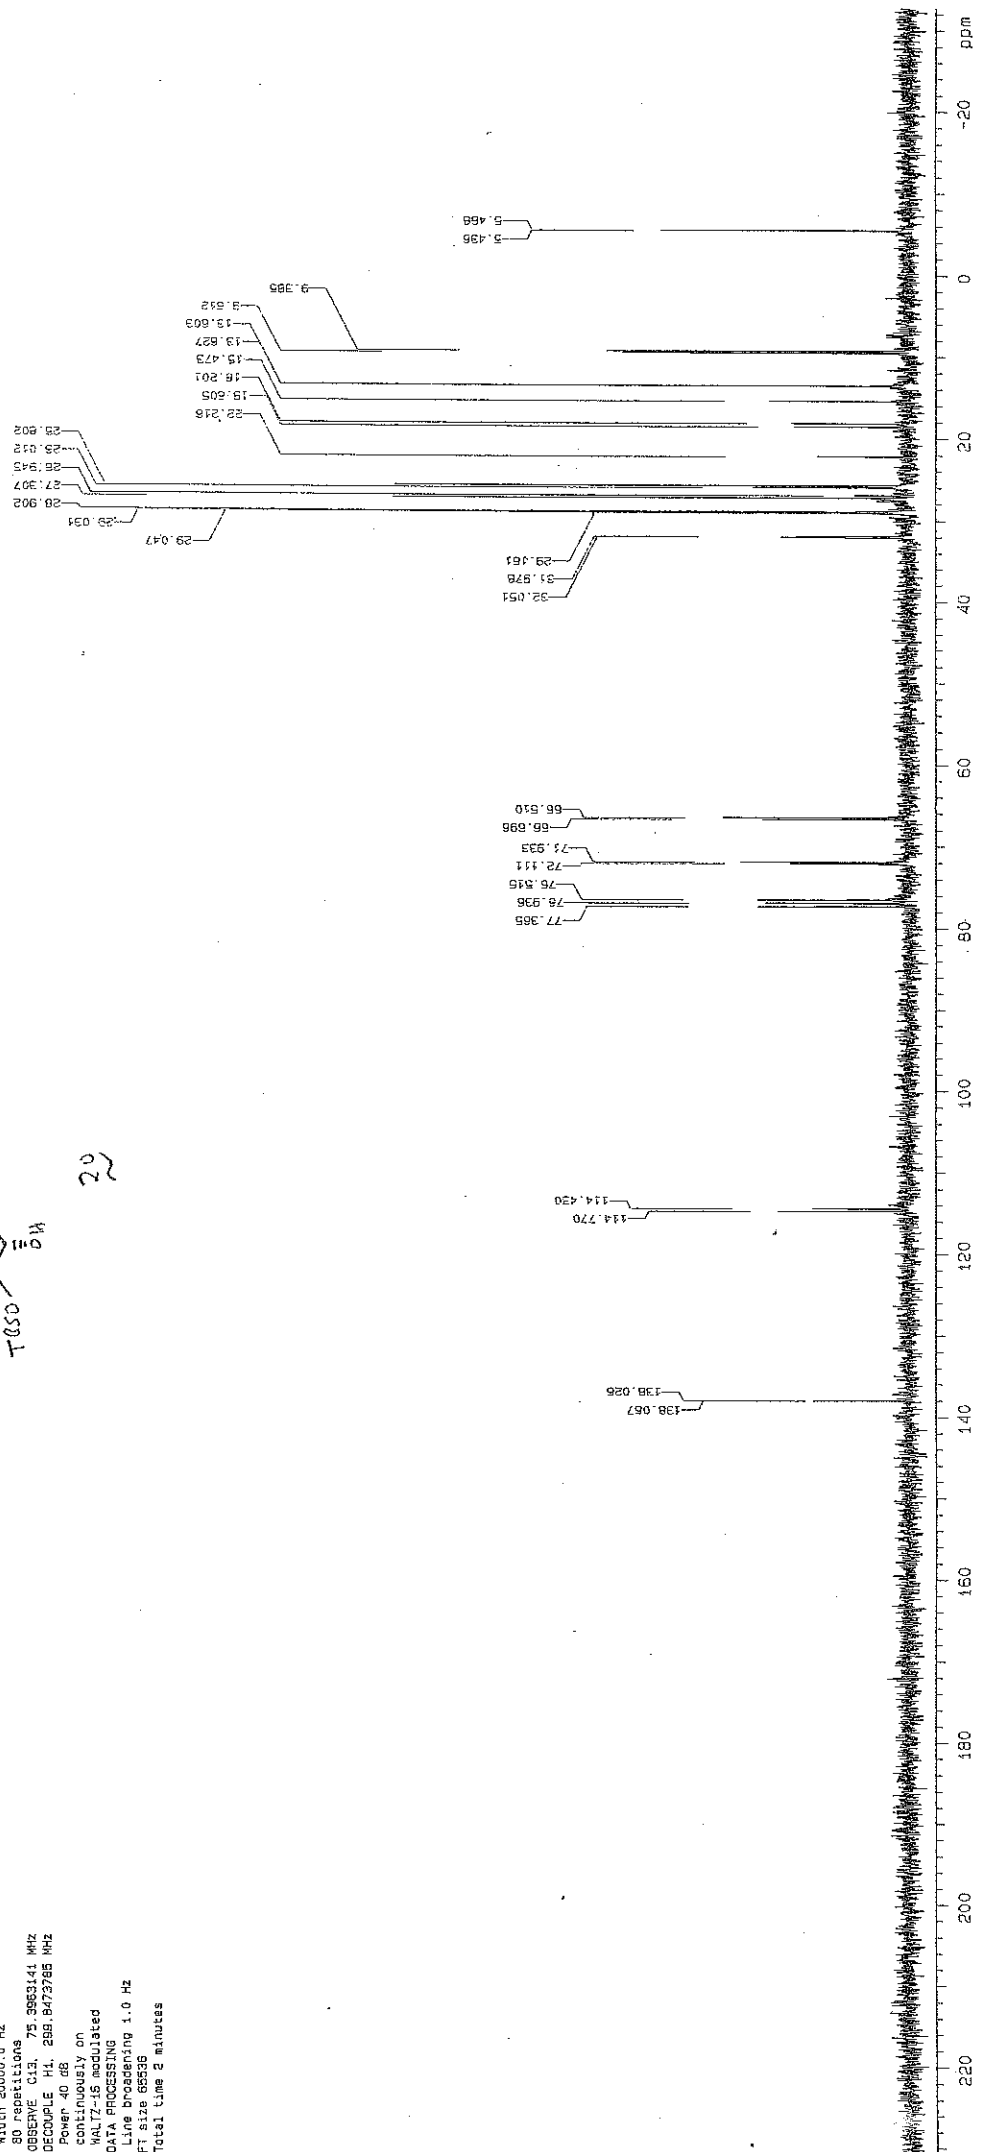

Nat Martin  
NGM 016  
CDCL3  
Run By: - IP  
proton 300MHz  
Inova 300  
parthos  
06-03-98  
175

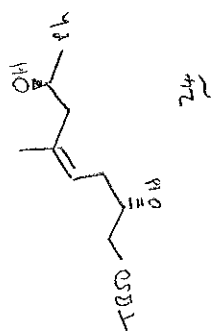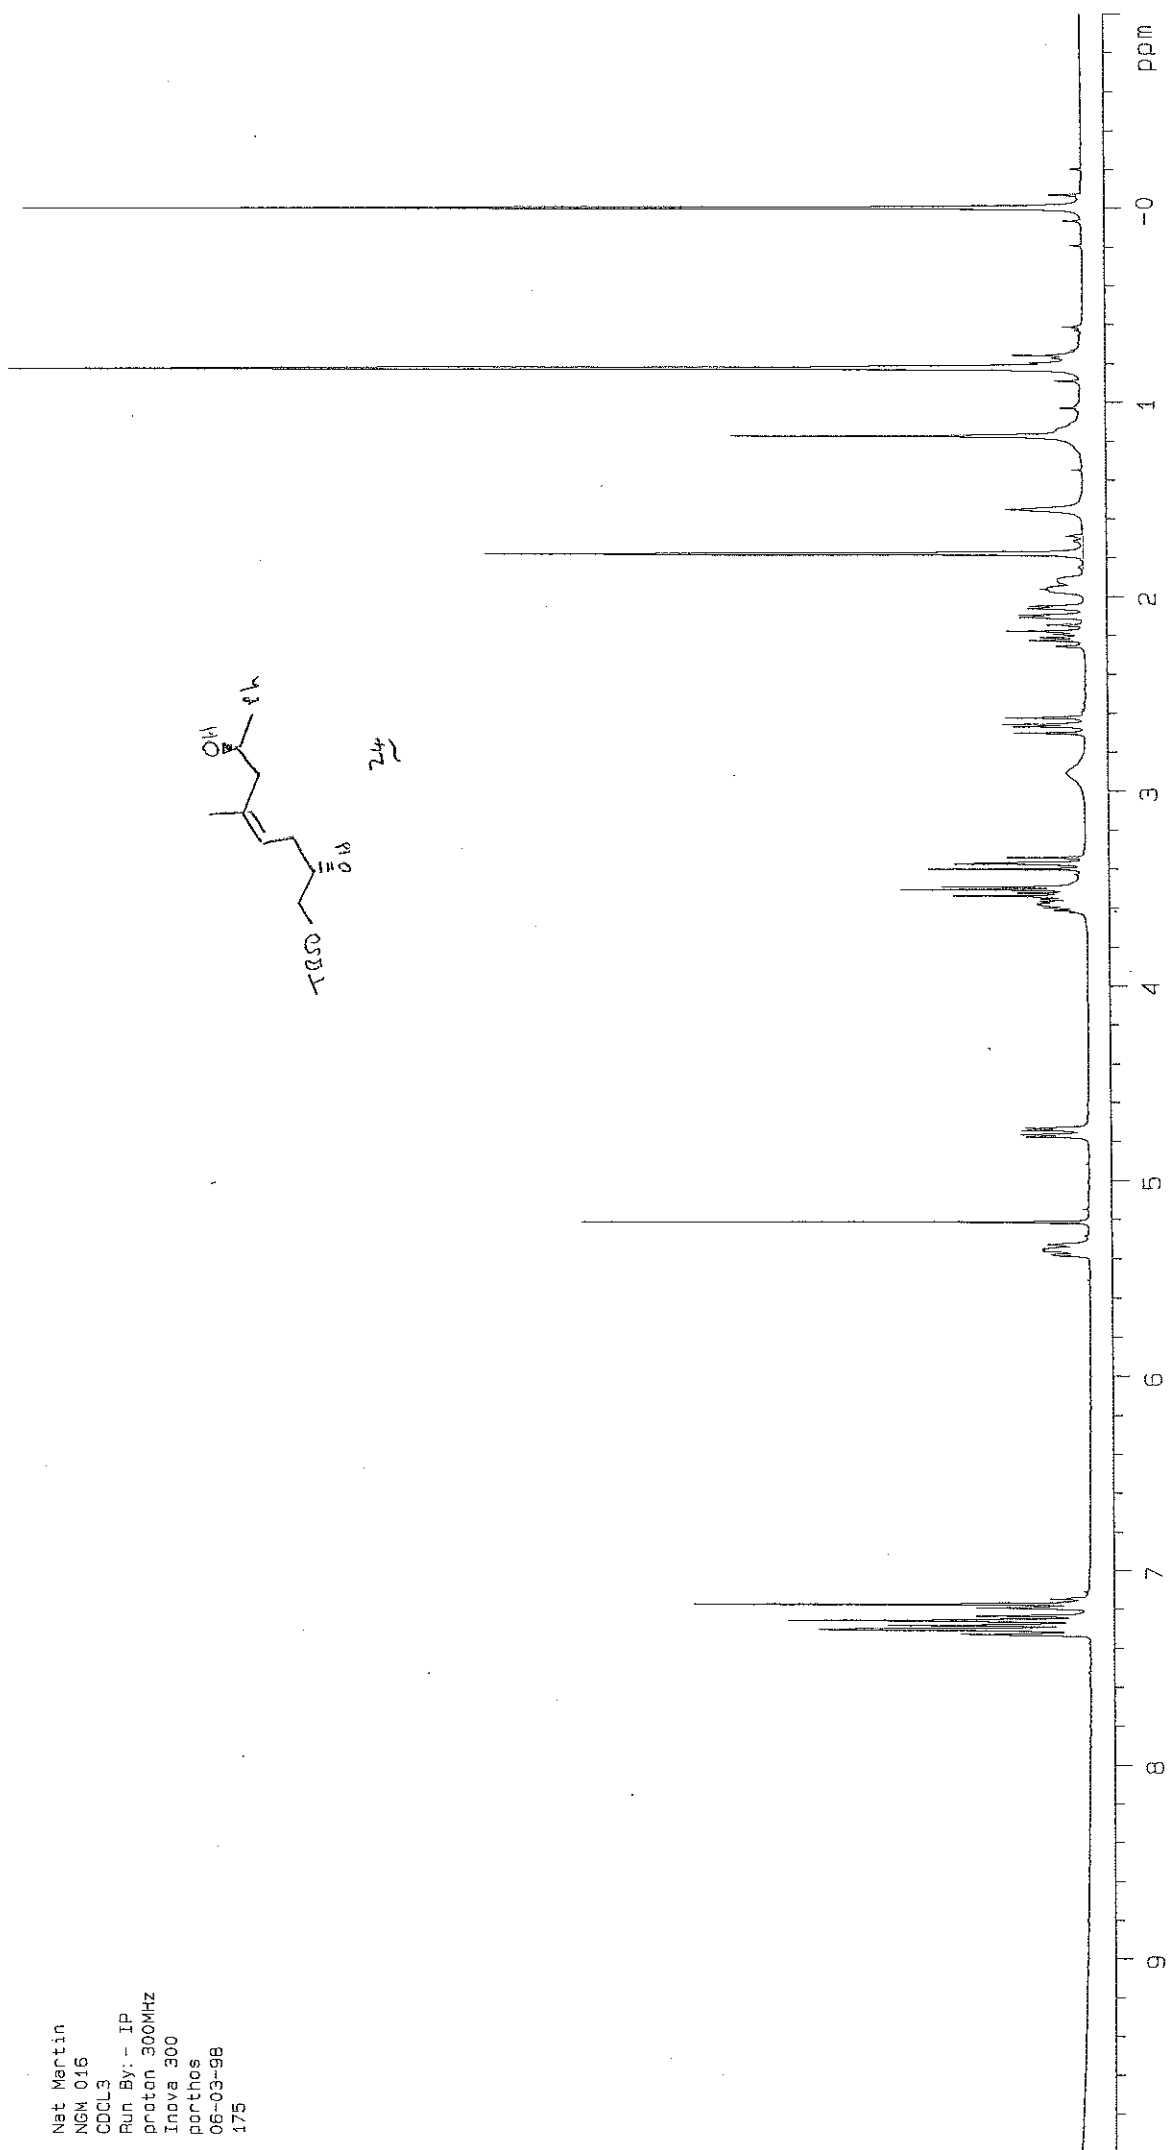

nm0016  
 STANDARD 2H OBSERVE

Solvent: CDCl3  
 Ambient temperature  
 Sample #29  
 File: 3502  
 Queue name: HRC09  
 DATE: Wed 2 Sep  
 INOVA-500 "echos"

PULSE SEQUENCE  
 PULPROG zgpg30  
 Acq. time 1.636 sec  
 Width 20000.0 Hz  
 32 repetitions

OBSERVE C13, 75.3853141 MHz  
 DECOUPLE H1, 299.6473705 MHz  
 Power 40 dB  
 continuously on  
 MALTZ-18 modulated  
 DATA PROCESSING  
 Line broadening 1.0 Hz  
 FT size 65536  
 Total time 3 minute

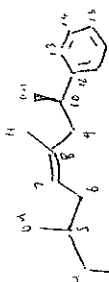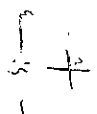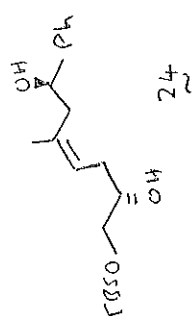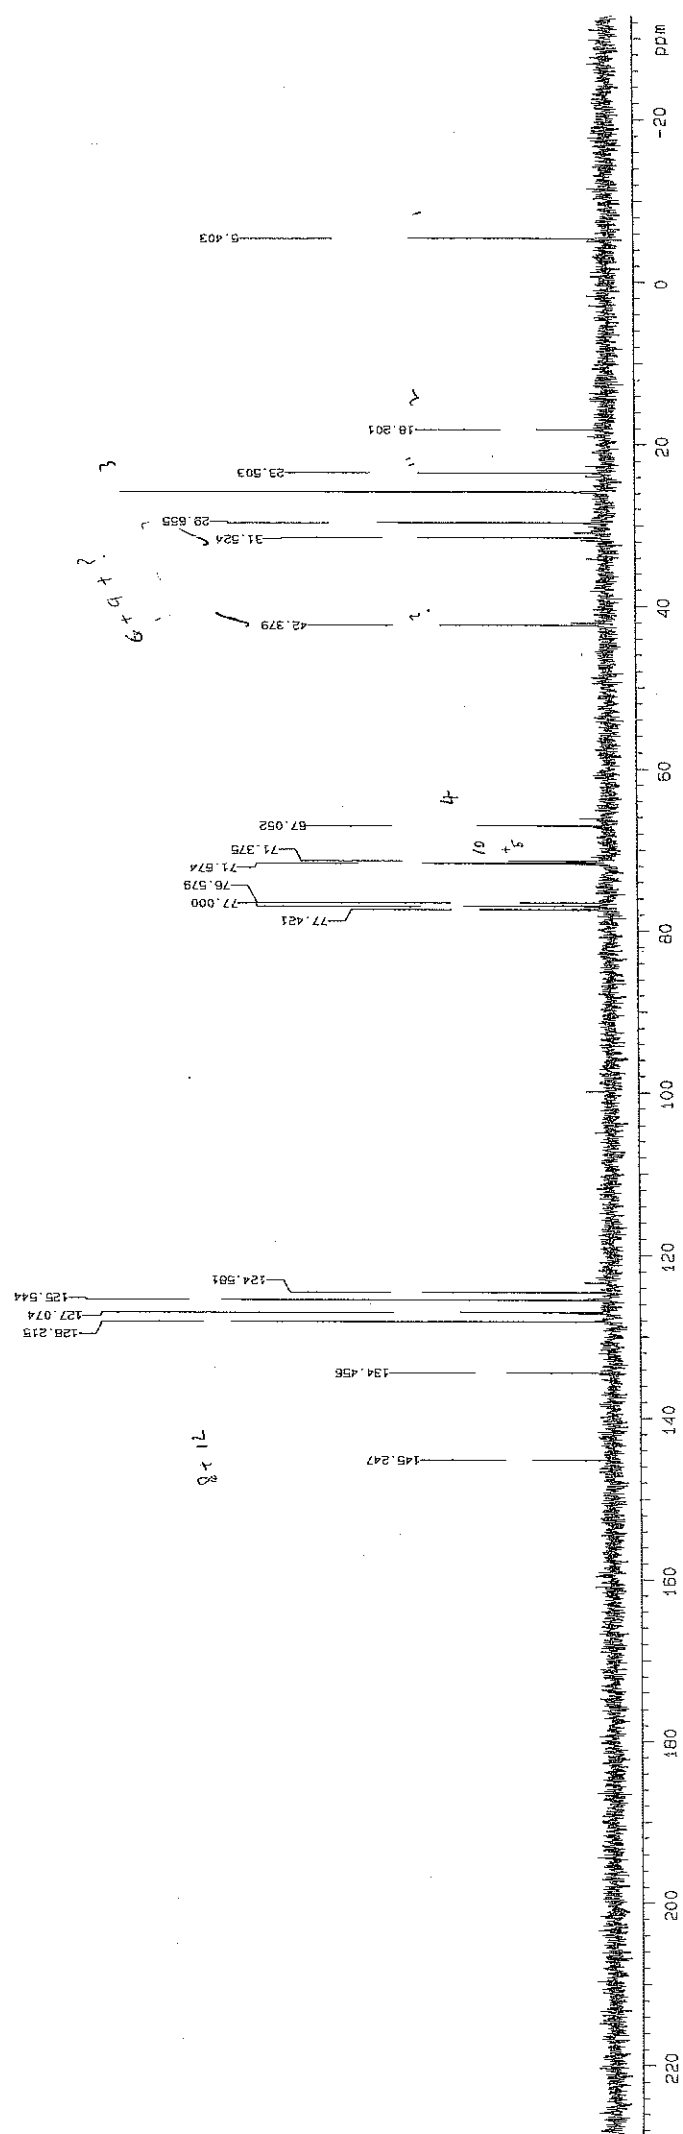

13 14 15 7

21 28

27 28

9 10 11 12

2.6

000017  
STANDARD 1H OBSERVE

Solvent: CDCl<sub>3</sub>  
Ambient Temperature  
Sample #40  
File: 4001  
Date\_ Time: 03/07/08  
Date\_ Time: 17:58  
INSTR: 300 "8chrs"

PULSE SEQUENCE  
Relax. delay 3.300 sec  
Pulse 90.0 degrees  
Acq. time 3.041 sec  
Width 4499.9 Hz  
Height 111.000  
Sensitivity 0.6455102 MHz  
Observed 67.500 MHz  
D1: 0.100 sec  
D17: PROCESSING  
Line broadening 0.3 Hz  
FT size 65536  
Total time 1 minutes

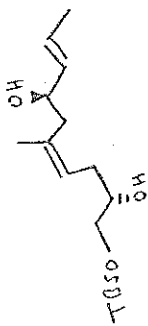

26

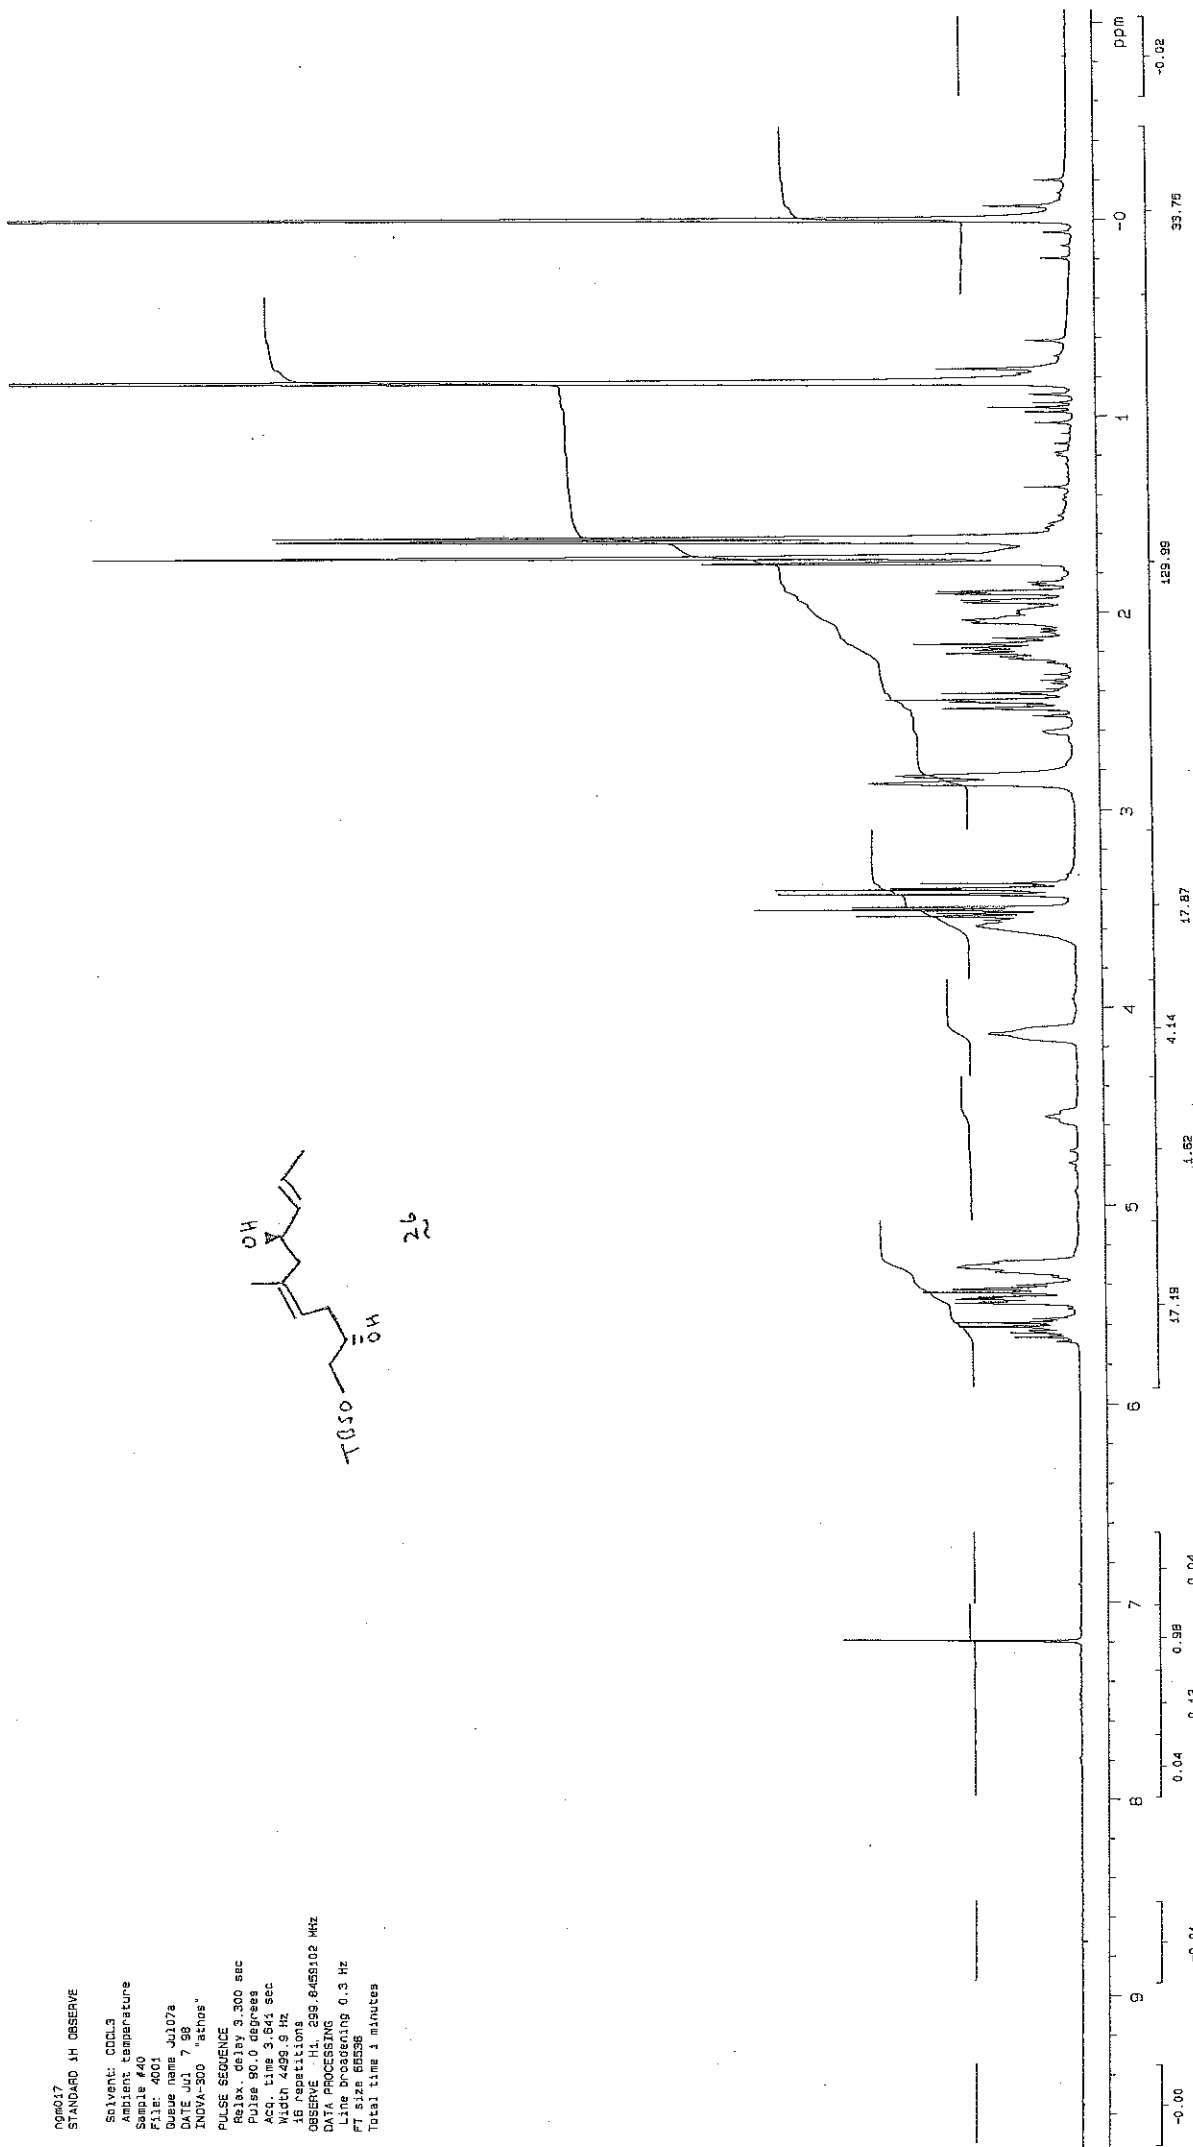

NSM 017.mr10r  
13C OBSERVE

Solvent: CDCL3  
Ambient temperature  
Sample #23  
File: 2301  
Queue Name: J01289  
DATE: JUL 26 08  
INPTX-500 \*8chos\*  
PULSEC SEQUENCE  
Pulse 45.0 degrees  
Acq. Time 1.638 sec  
Width 20000.0 Hz  
48 repetitions  
OBSERVE C13, 75.3963141 MHz  
DECOUPLE HA, 299.8473788 MHz  
Power 40 dB  
Pulsed on  
Pulsed on  
MULTI-48 multiscan  
DATA PROCESSING  
Line broadening 1.0 Hz  
FI size 68935  
Total time 1 minute

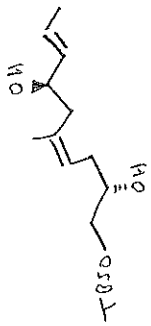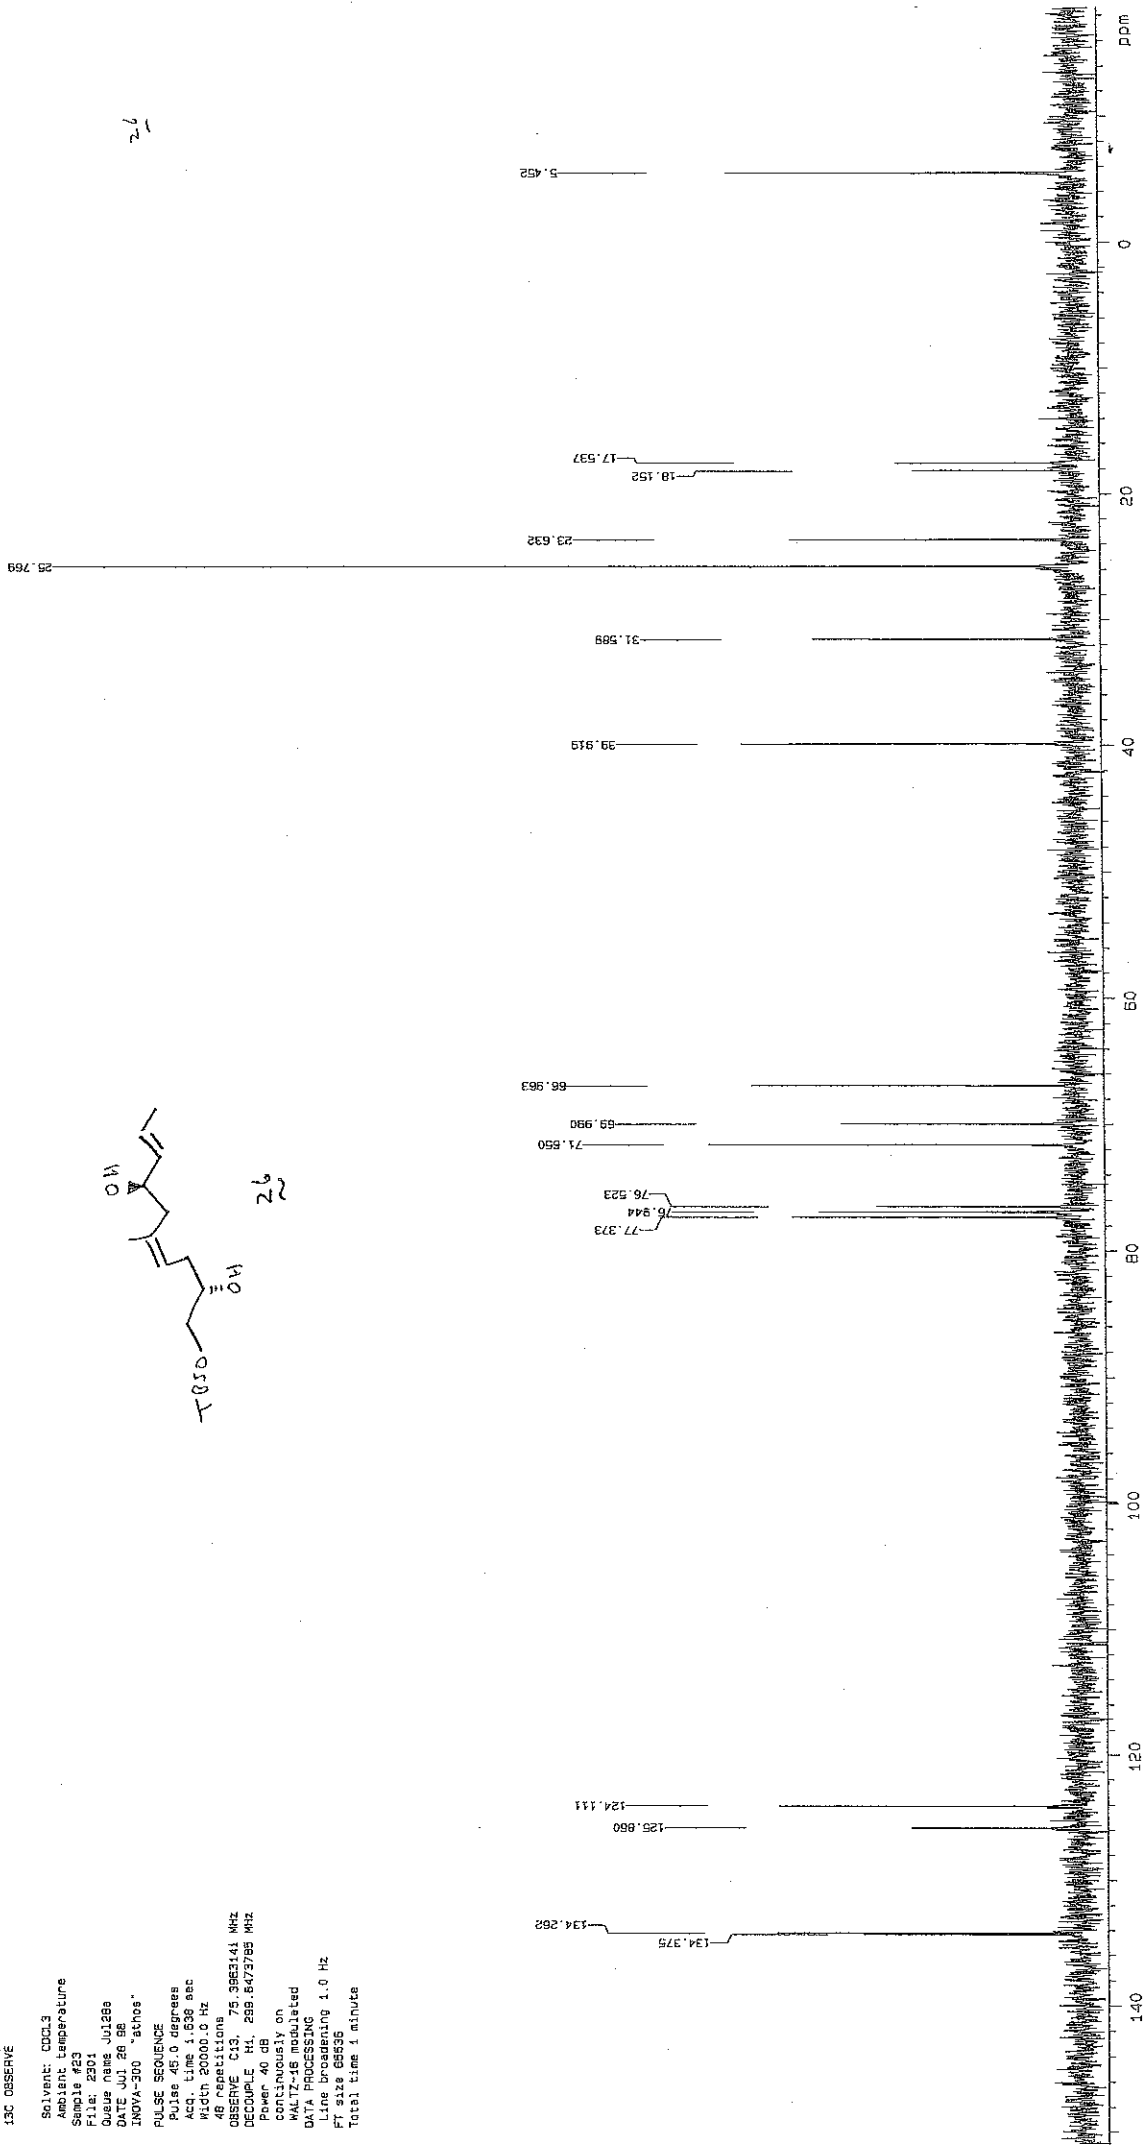

33

N. Martin  
NGM-Acetonide  
CDCl3  
proton 300MHZ  
Inova 300  
porthos  
12-01-99  
809  
Solvent: cdcl3  
Ambient temperature  
File: 809  
DATE Jan 12 99  
INOVA-300 "athos"  
PULSE SEQUENCE  
Relax. delay 5.000 sec  
Pulse 58.1 degrees  
Acq. time 3.636 sec  
Width 4306.0 Hz  
64 repetitions  
OBSERVE H1 300.1032010 MHz  
DATA PROCESSING  
Line broadening 0.3 Hz  
FT size 65536  
Total time 9 minutes

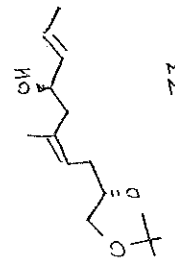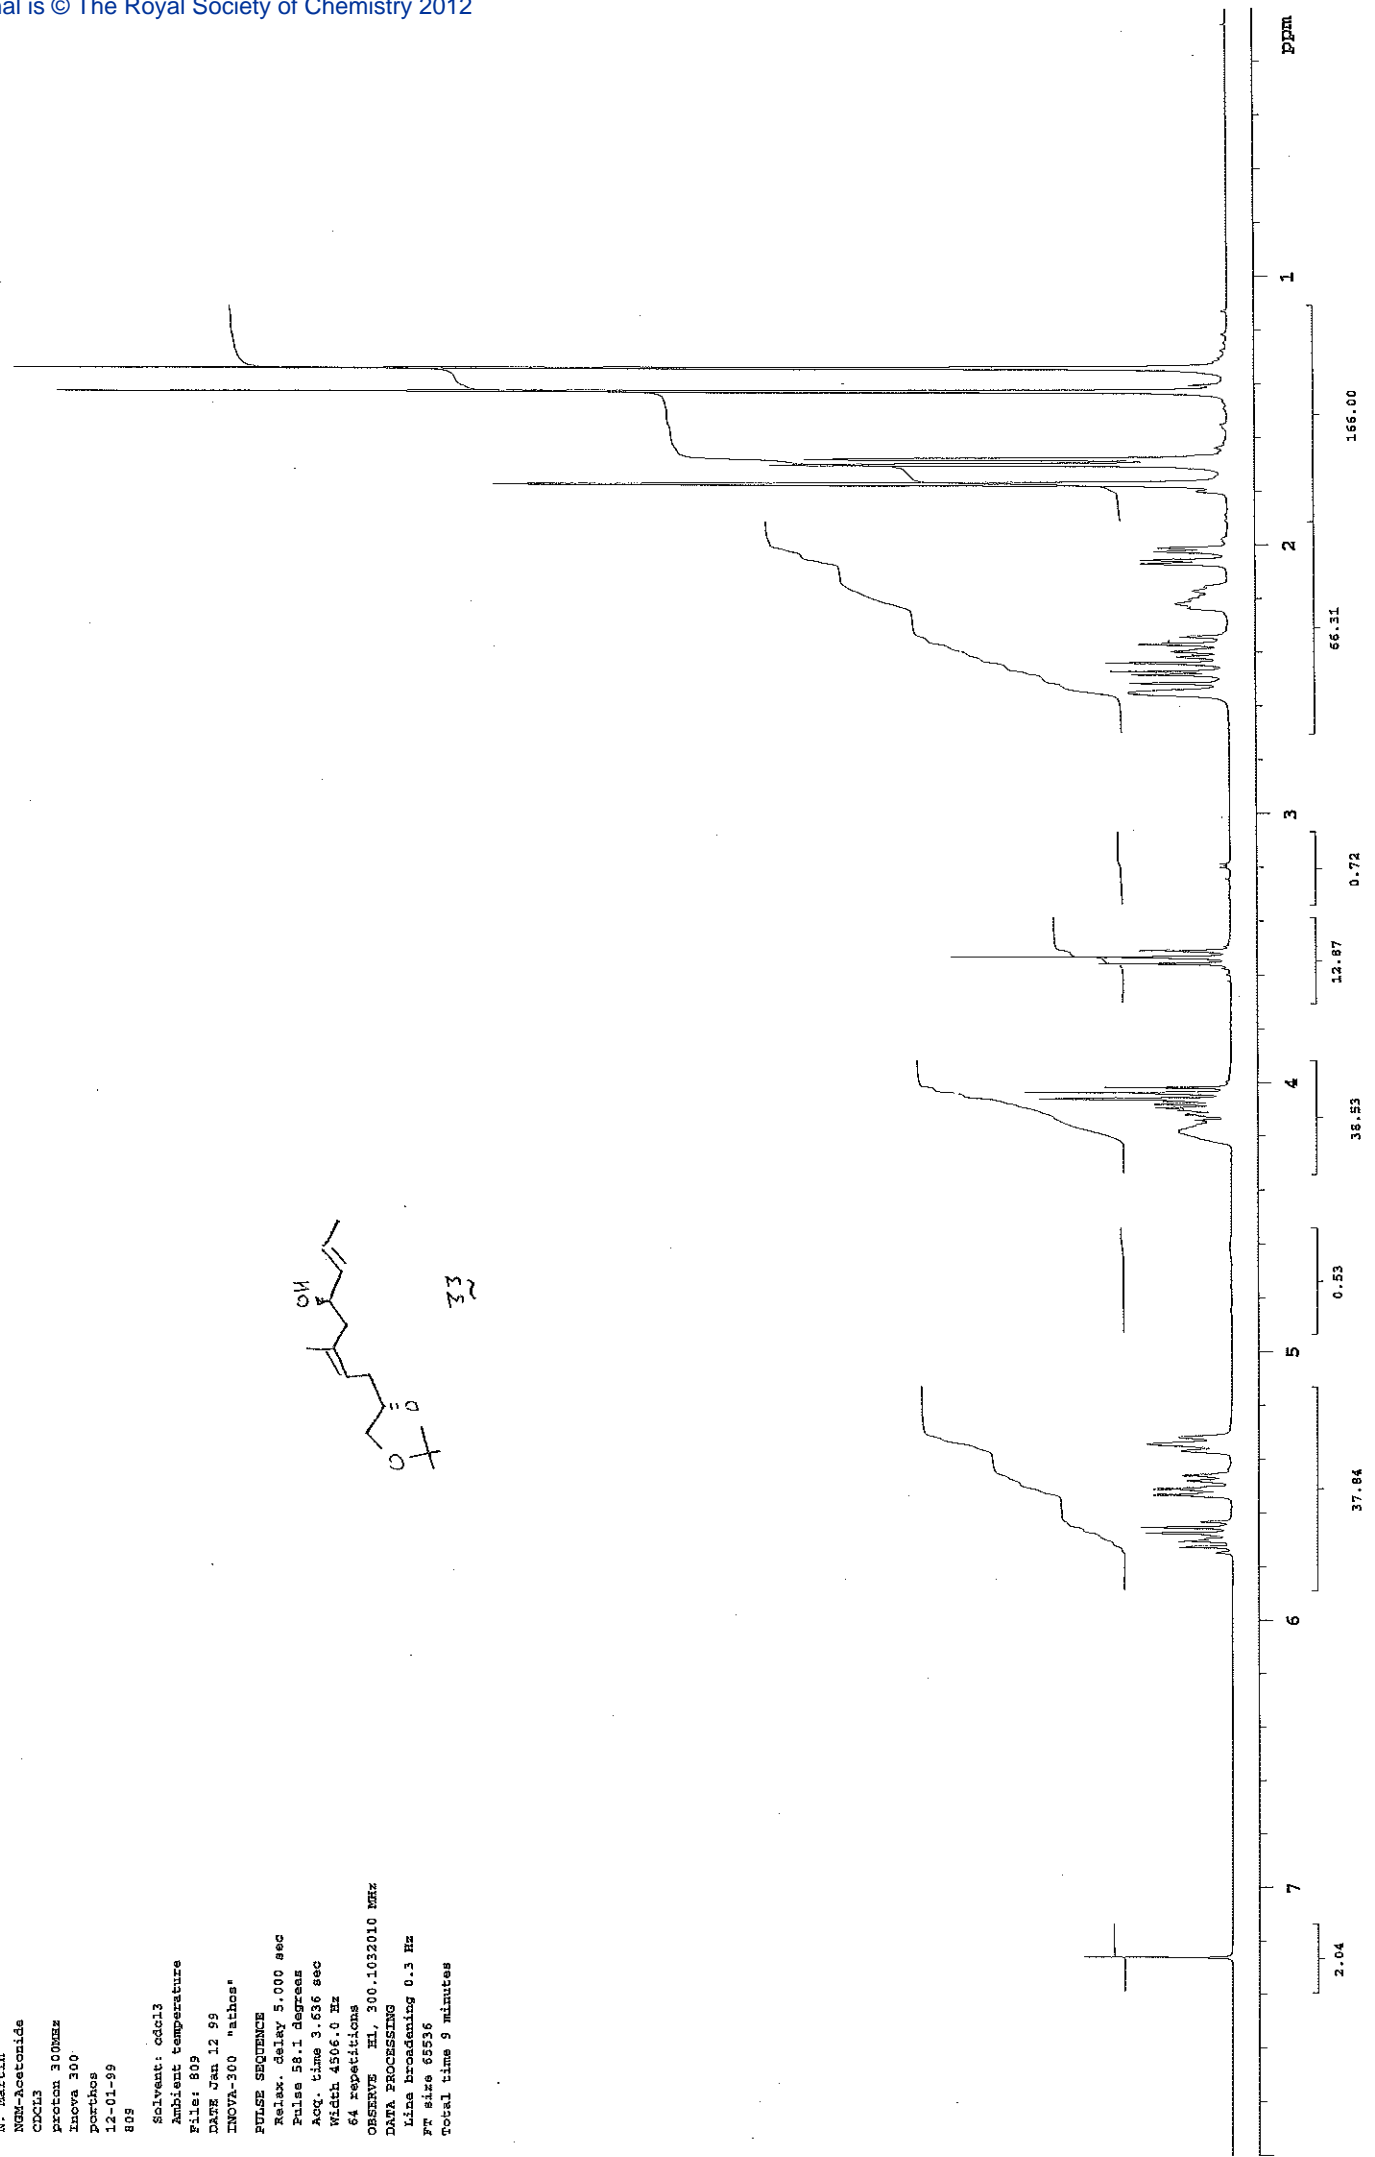

ACETONIDE  
STANDARD 1H OBSERVE

Solvent: CDCl3  
Ambient temperature  
Sample #29  
File: 2902  
Quanta name Nov05b  
DATE NOV 9 98  
INOVA-300 "athos"

PULSE SEQUENCE  
Pulse 45.0 degrees  
Acq. time 1.638 sec  
Width 20000.0 Hz  
1024 repetitions  
OBSERVE C13, 75.3963141 MHz  
DECOUPLE H1, 299.6473785 MHz  
Power 40 dB  
continuously on

WALTZ-16 modulated  
DATA PROCESSING  
Line broadening 1.0 Hz  
Ft size 65536  
Total time 27 minutes

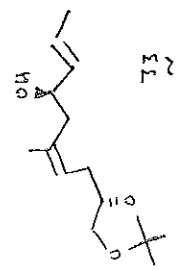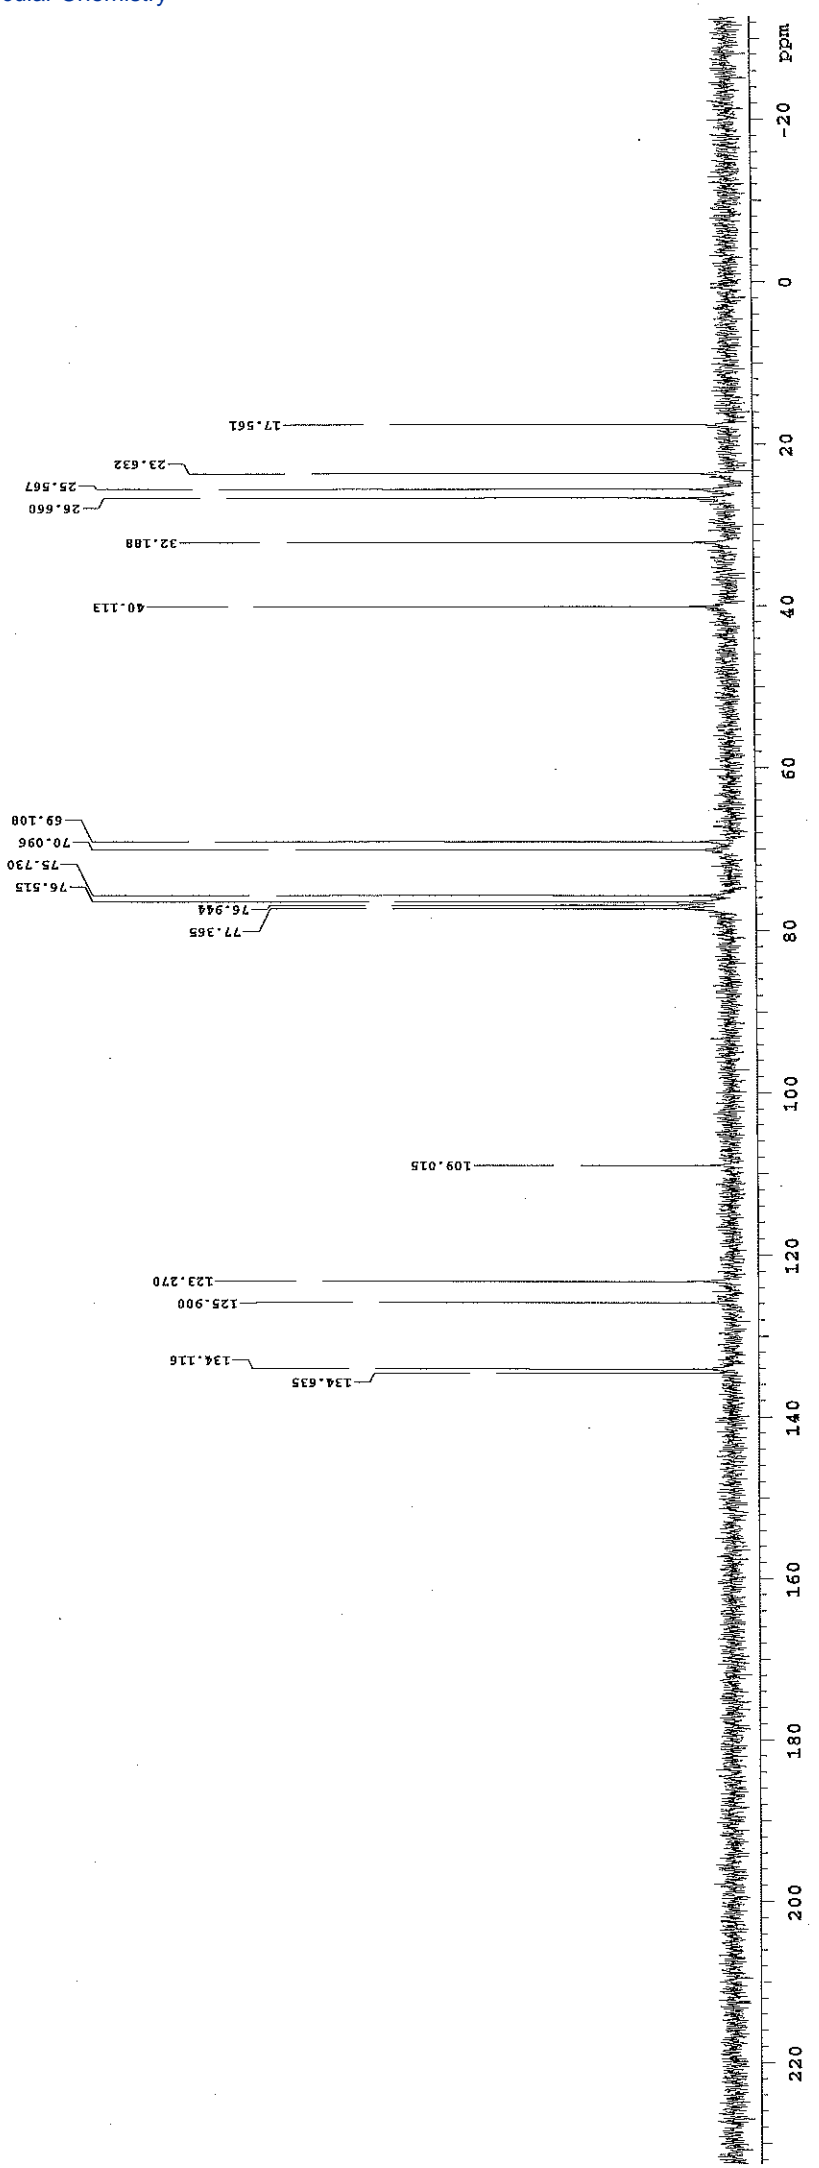



35

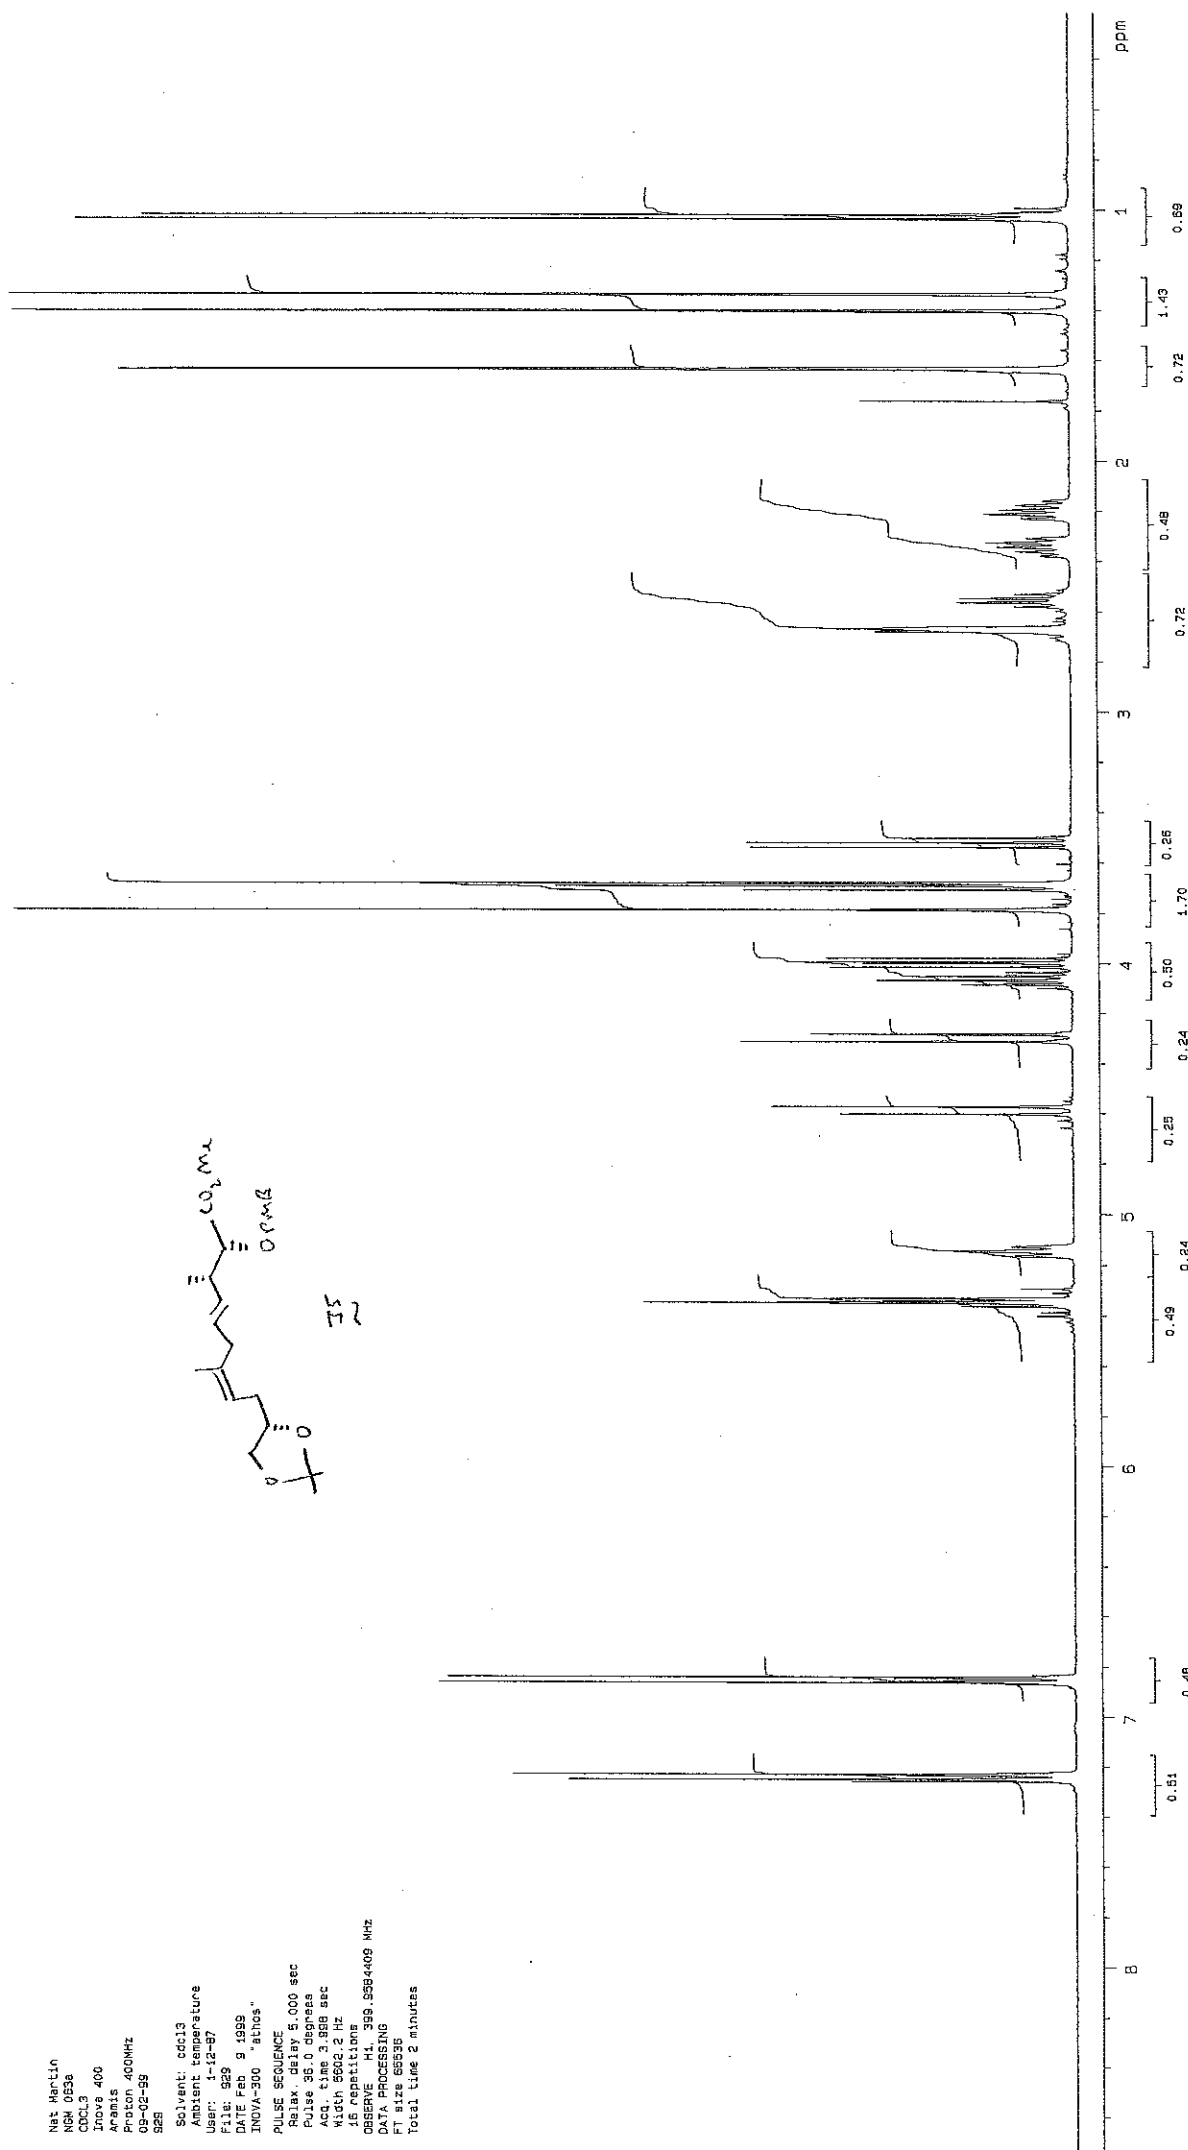

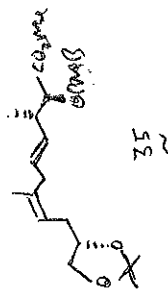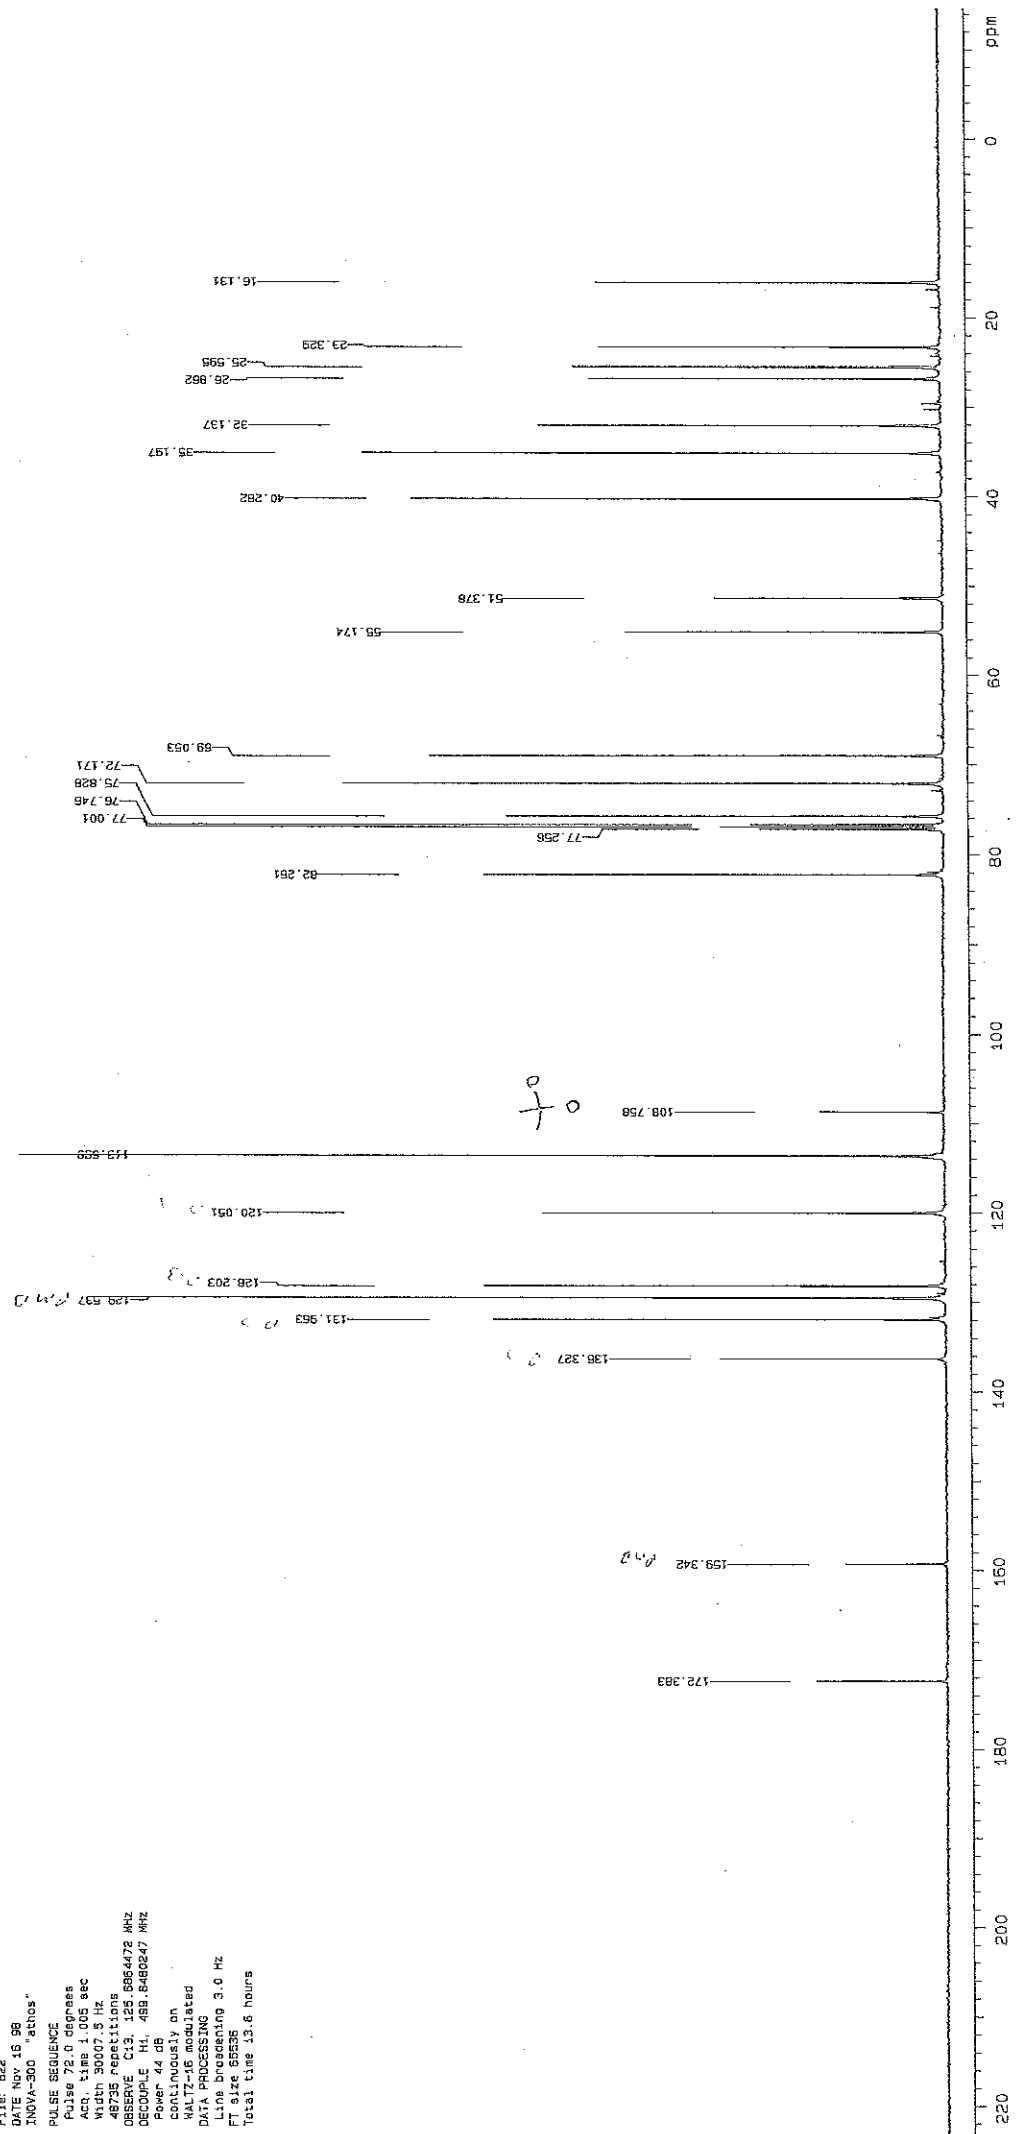

N Martin  
 NGM053  
 cdc13  
 622c  
 5mm PFS probe  
 Unity 500 (P-K)  
 16-11-98  
 Solvent: cdc13  
 Ambient temperature  
 User: j-15-87  
 File: 622  
 DATE Nov 15 98  
 INOVA-300 "achos"  
 PULSE SEQUENCE  
 Pulse 72.0 degrees  
 Acq. time 1.005 sec  
 Width 30007.5 Hz  
 48735 repetitions  
 OBSERVE C13, 125.8864472 MHz  
 DECOUPLE H1, 489.8480647 MHz  
 Power 44 dB  
 continuously on  
 WALTZ-16 modulated  
 DATA PROCESSING  
 Line broadening 3.0 Hz  
 FT size 65536  
 Total time 13.6 hours

ic 1,8 stuff  
STANDARD 1X OBSERVE

Solvent: CDCl3  
Ambient temperature  
Sample #6  
File: 601  
Queue name Mar30a  
DATE Mar 30 99  
INNOVA-300 "athos"  
PULSE SEQUENCE  
Relax. delay 3.300 sec  
Pulse 90.0 degrees  
Acq. time 3.641 sec  
Width 499.9 Hz  
16 repetitions  
OBSERVE F1, 299.8458783 MHz  
DATA PROCESSING  
Line broadening 0.3 Hz  
FT size 65536  
Total time 1 minutes

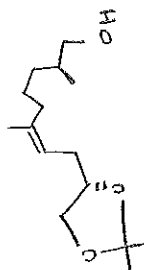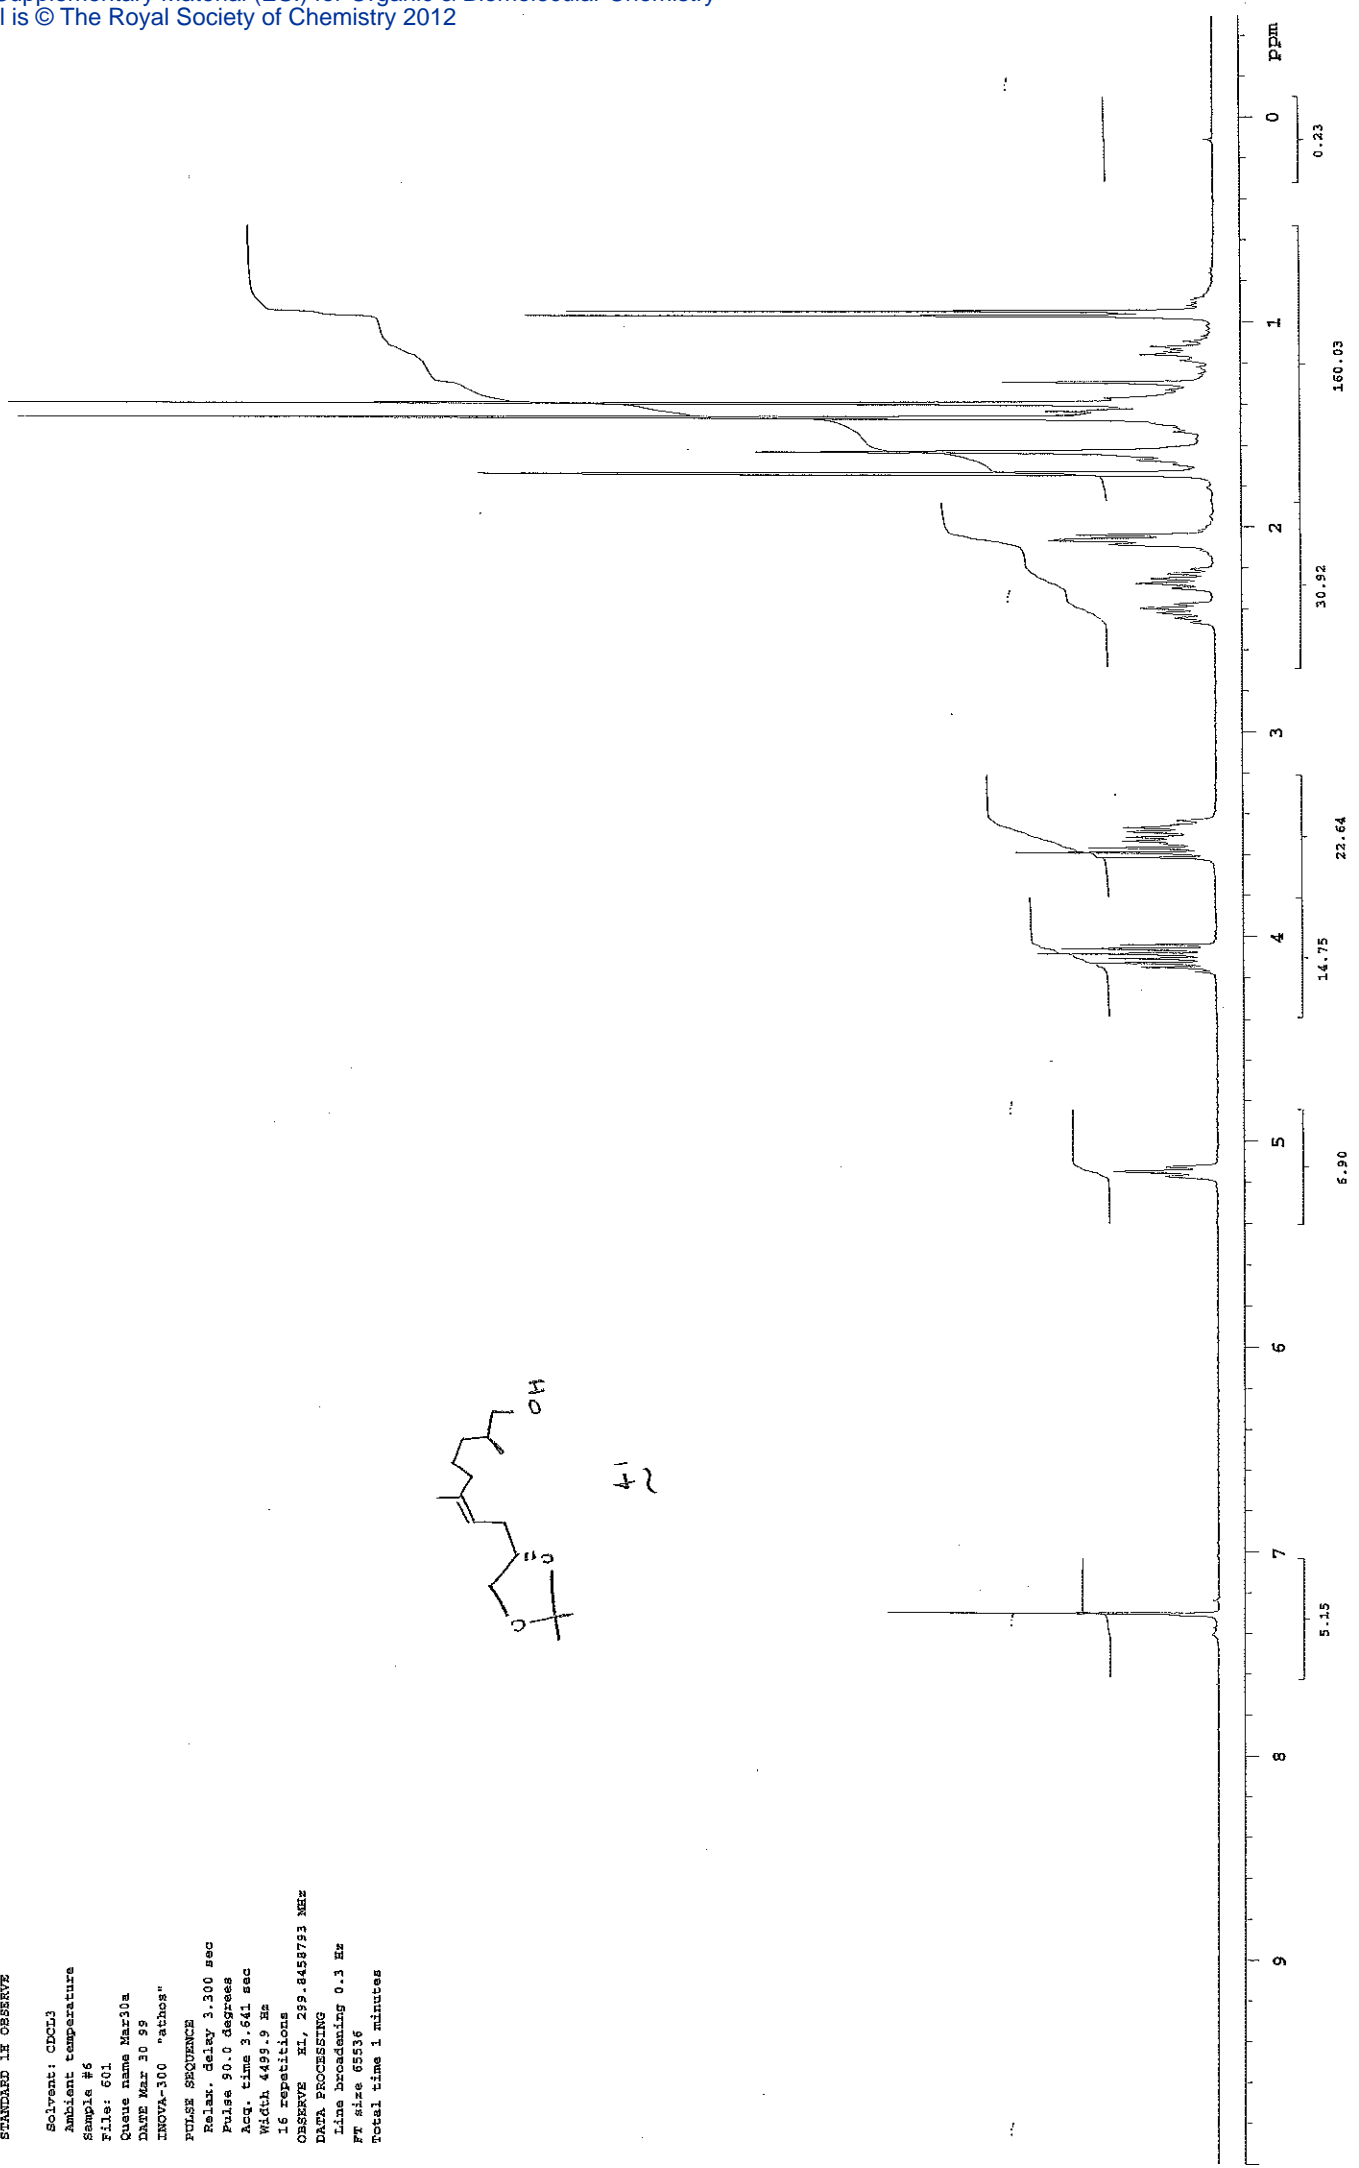

nmr ic 1.8  
13C OBSERVE

Solvent: CDCl3  
Ambient temperature  
Sample #32  
File: 3201  
Queue name Mar30a  
DATE Mar 30 99  
INOVA-300 "athos"

PULSE SEQUENCE  
Pulse 45.0 degrees  
Acq. time 1.638 sec  
Width 20000.0 Hz  
1024 repetitions  
OBSERVE C13, 75.3963141 MHz  
DECOUPLE H1, 299.8473785 MHz  
Power 40 dB  
continuously on  
WALTZ-16 modulated  
DATA PROCESSING  
Line broadening 1.0 Hz  
Ft size 65536  
Total time 27 minutes

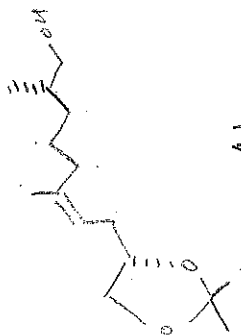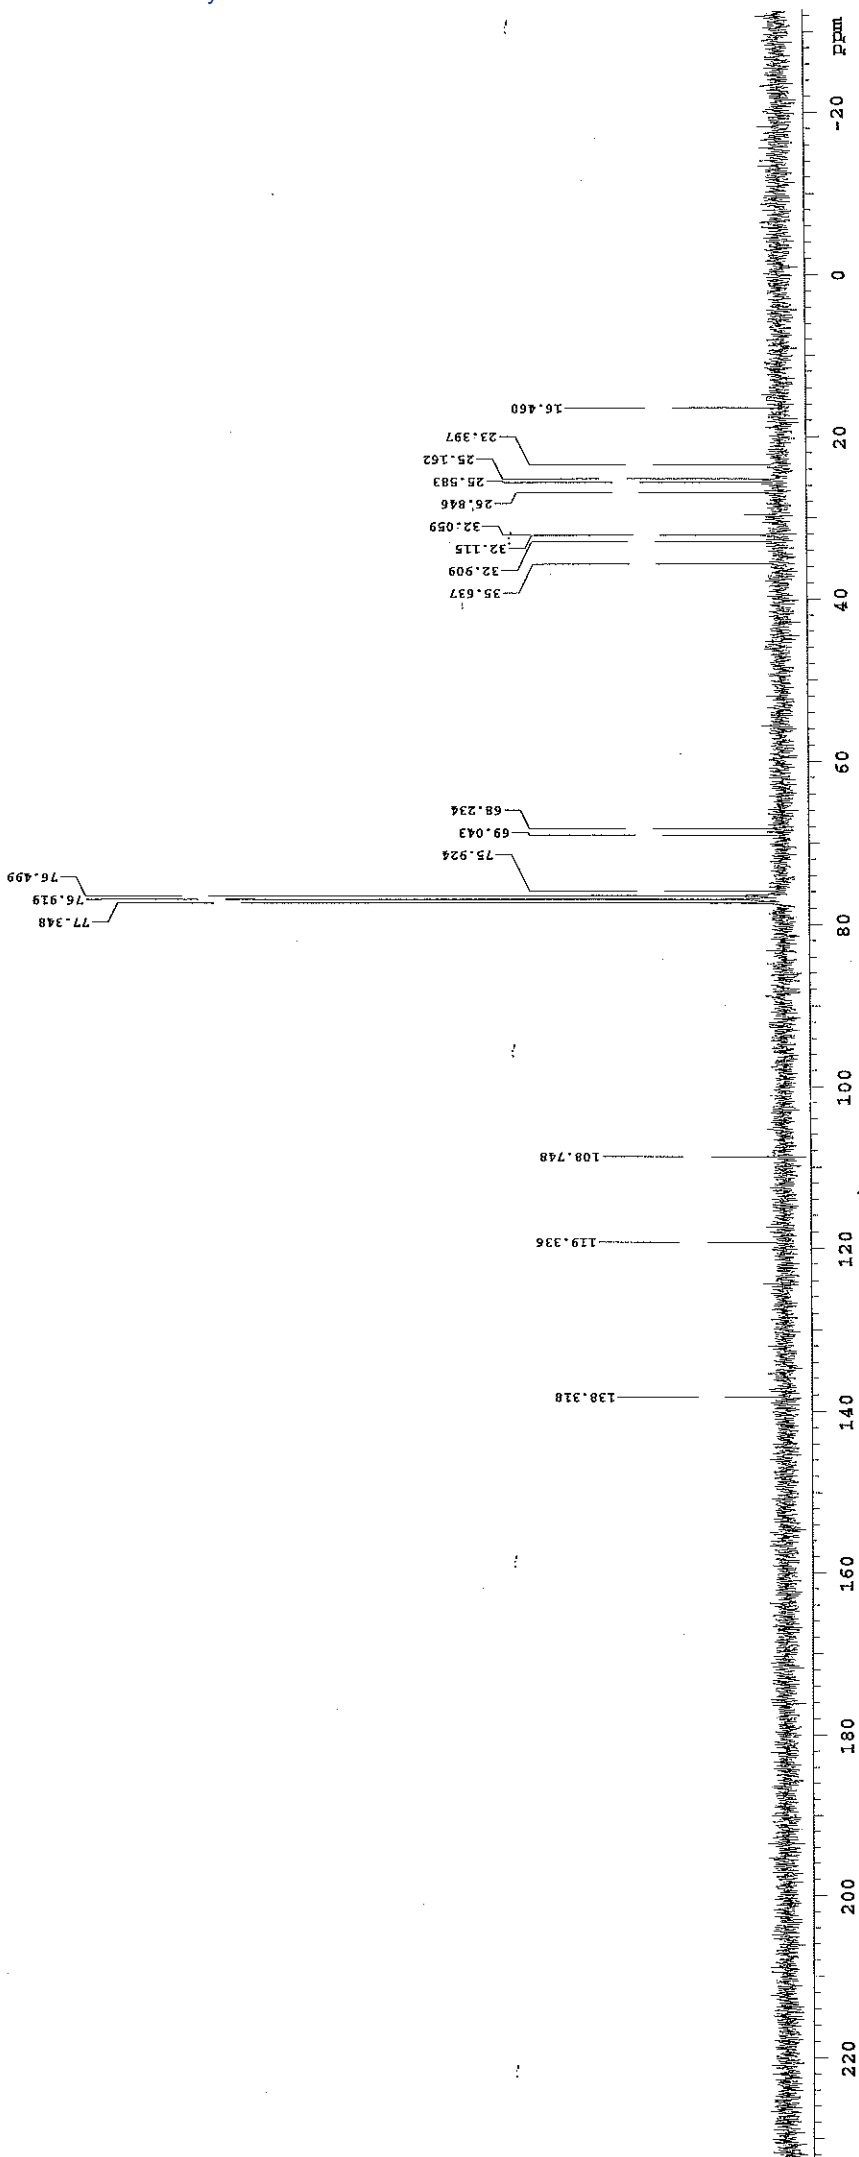

44

ald  
STANDARD 1H OBSERVE  
Solvent: CDCL3  
Ambient temperature  
Sample #6  
File: 601  
Queue name Feb04a  
DATE Feb 4 00  
INOVA-300 "athos"  
PULSE SEQUENCE  
Relax. delay 3.300 sec  
Pulse 90.0 degrees  
Acq. time 3.641 sec  
Width 4499.9 Hz  
16 repetitions  
OBSERVE HL, 299.8458793 MHz  
DATA PROCESSING  
Line broadening 0.3 Hz  
Ft size 65536  
Total time 1 minutes

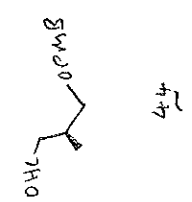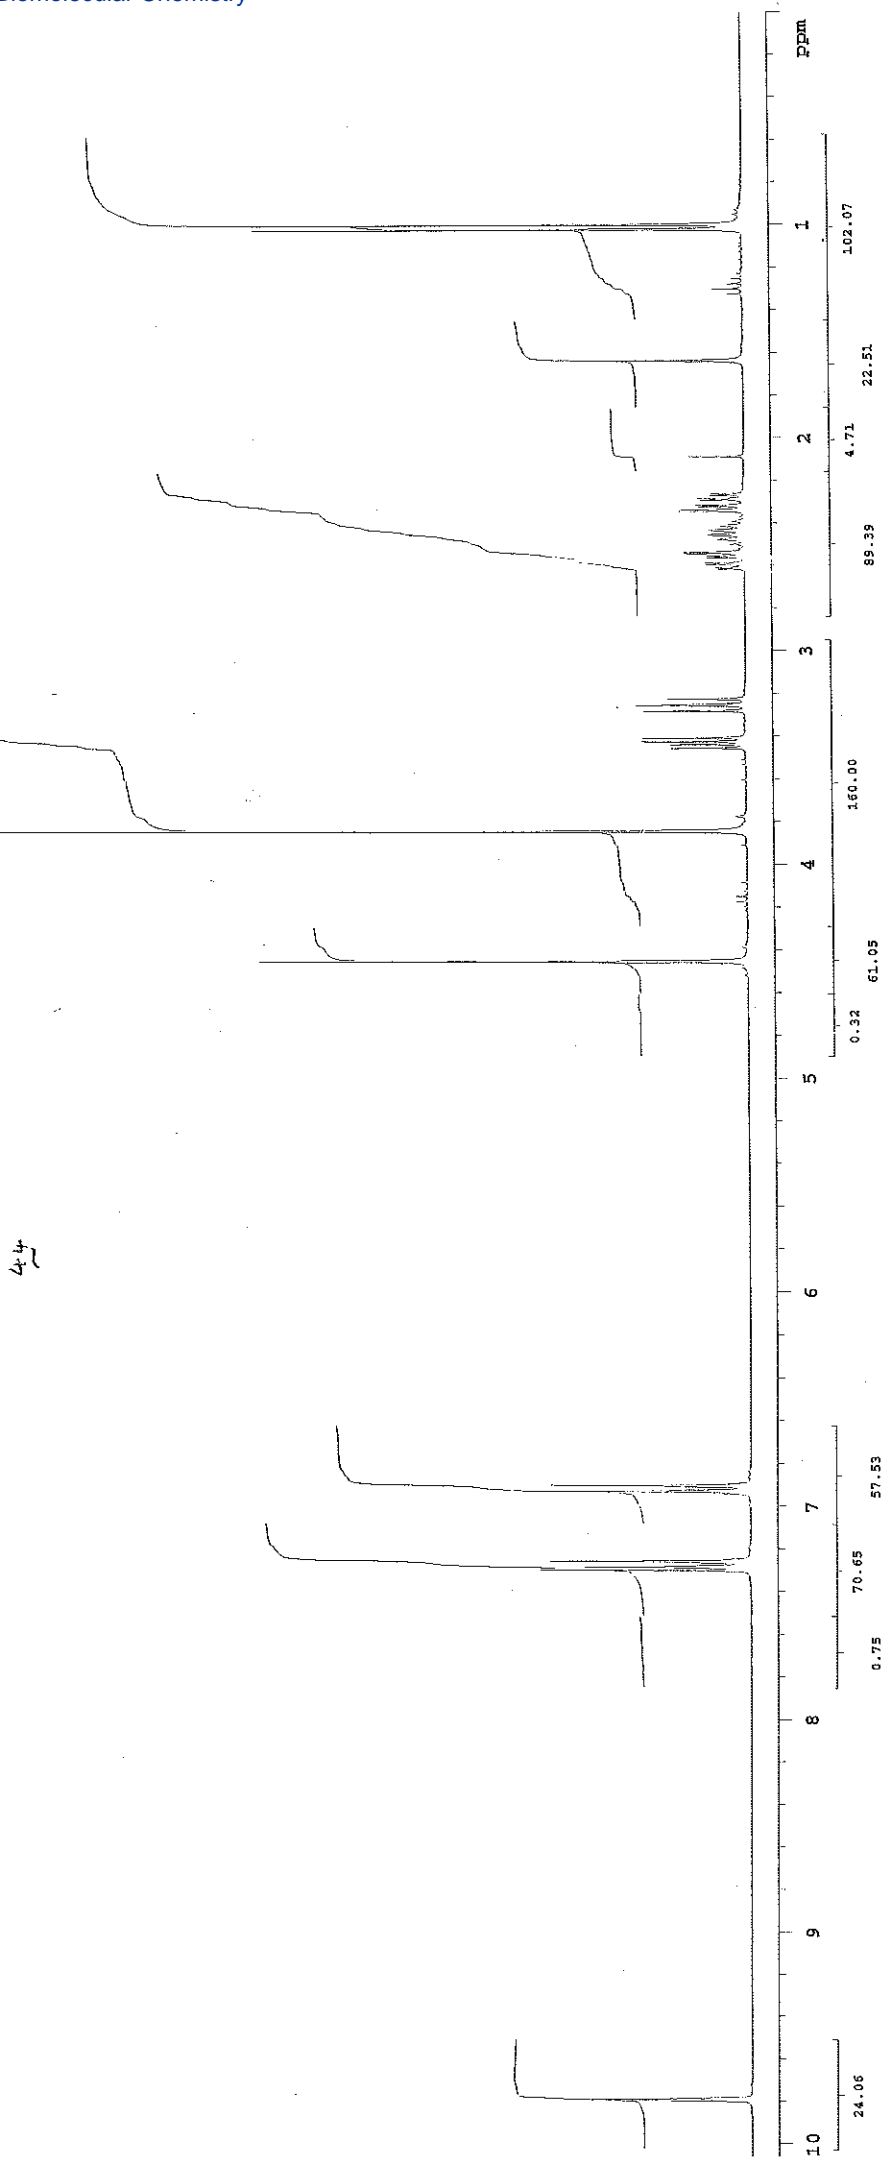

44

hem052  
STANDARD 1H OBSERVE

Solvent: CDCl3  
Ambient temperature  
Sample #34  
File: 3402  
Queue name Sep10b  
DATE Sep 10 98  
INOVA-300 "athos"  
PULSE SEQUENCE  
Pulse 45.0 degrees  
Acq. time 1.628 sec  
Width 20000.0 Hz  
64 repetitions  
OBSERVE CH, 75.3963141 MHz  
DECOUPLE RL, 299.8475785 MHz  
Power 40 dB  
continuously on

WALTZ-16 modulated  
DATA PROCESSING  
Xline broadening 1.0 Hz  
Ft size 65536  
Total time 1 minutes

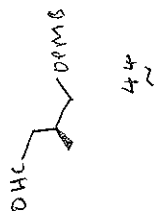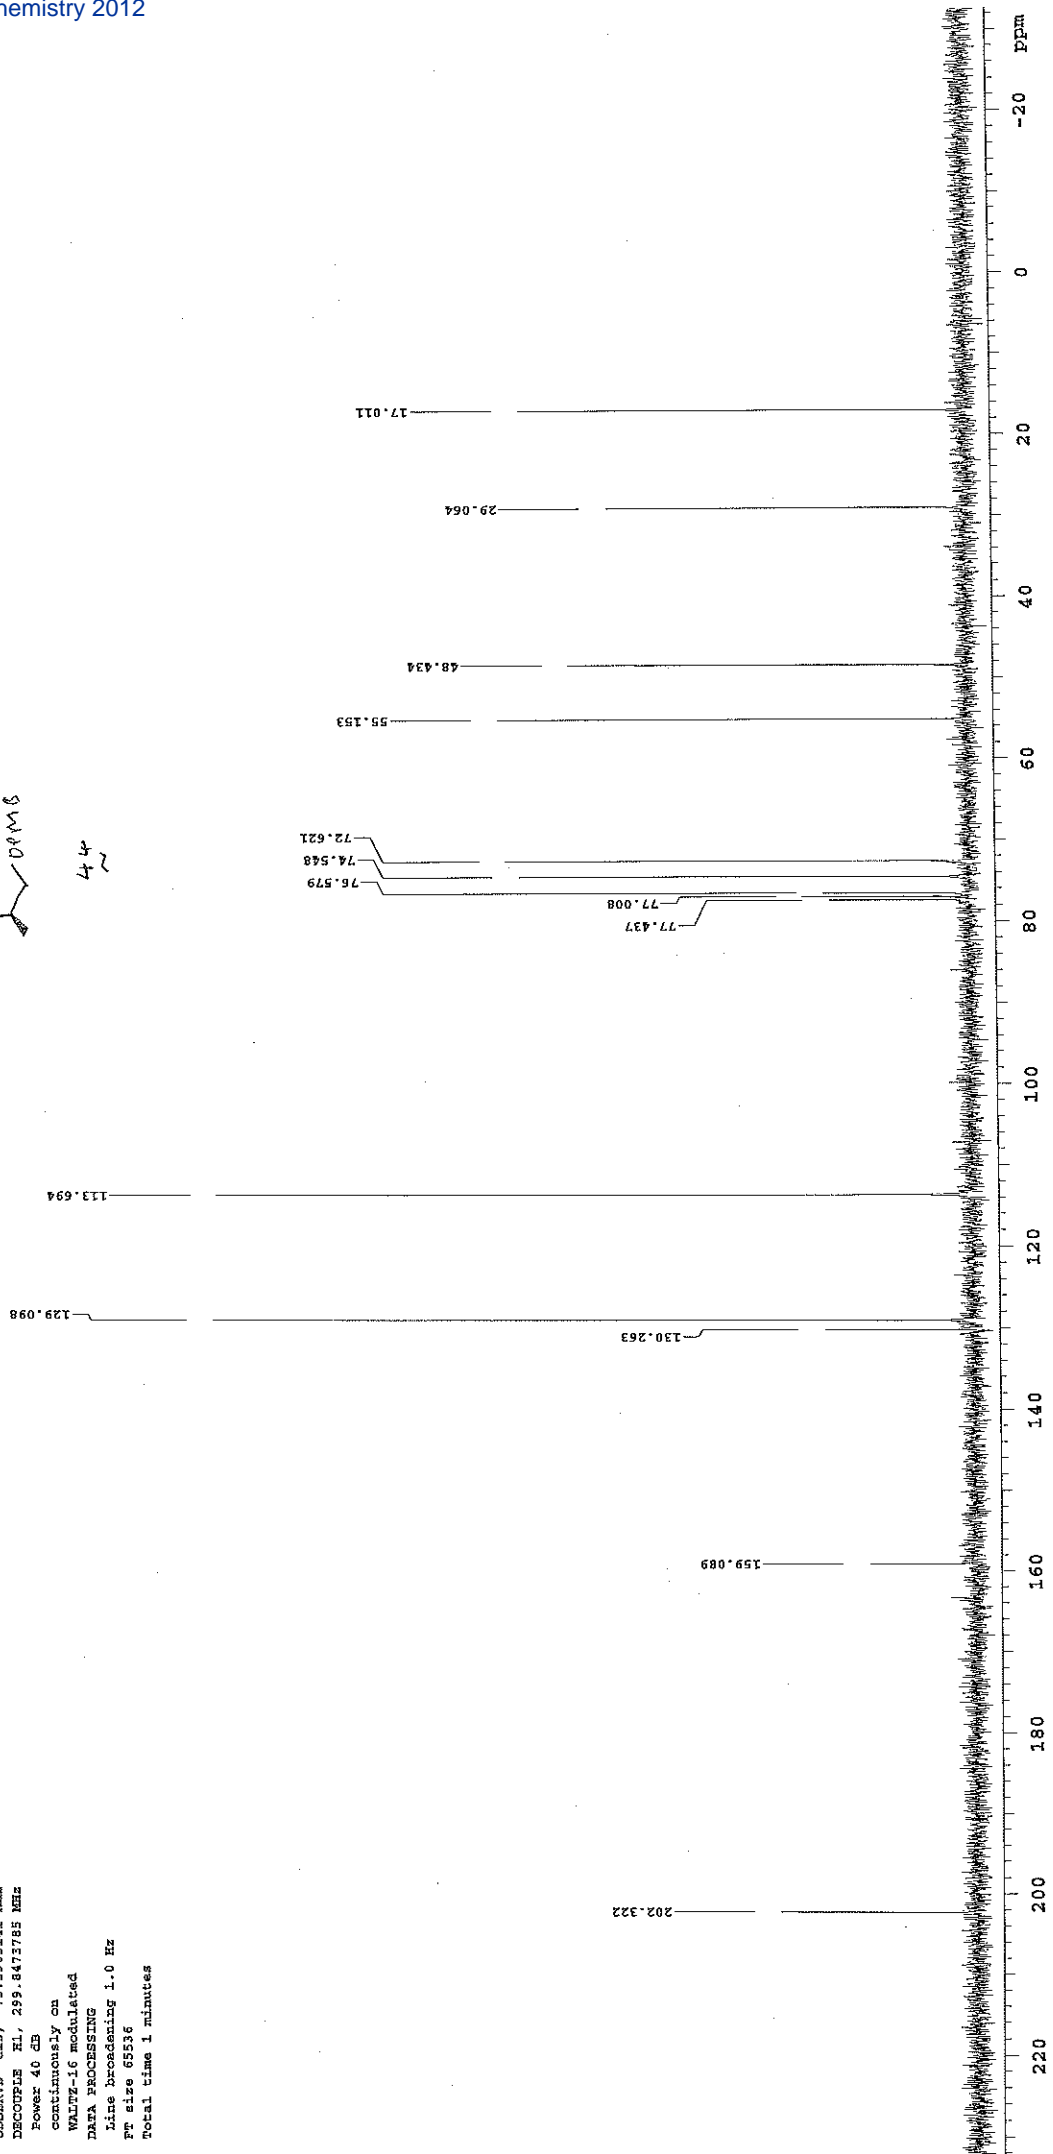

45

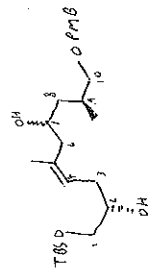

45

hnm054  
 STANDARD 1H OBSERVE  
 Solvent: CDCl3  
 Acquire temperature  
 Sample #7  
 File: 701  
 Queue name: hnm054  
 DATE\_89D\_15\_09  
 INOVA-300 "achos"  
 PULSE SEQUENCE  
 Relax delay 3.300 sec  
 Pulse program gpgpgp  
 Acquire time 00:04:56  
 Width 4489.9 Hz  
 IS repetitions  
 OBSERVE H1 299.6426106 MHz  
 DATA PROCESSING  
 Line broadening 0.3 Hz  
 FT size 65536  
 Total time 1 minutes

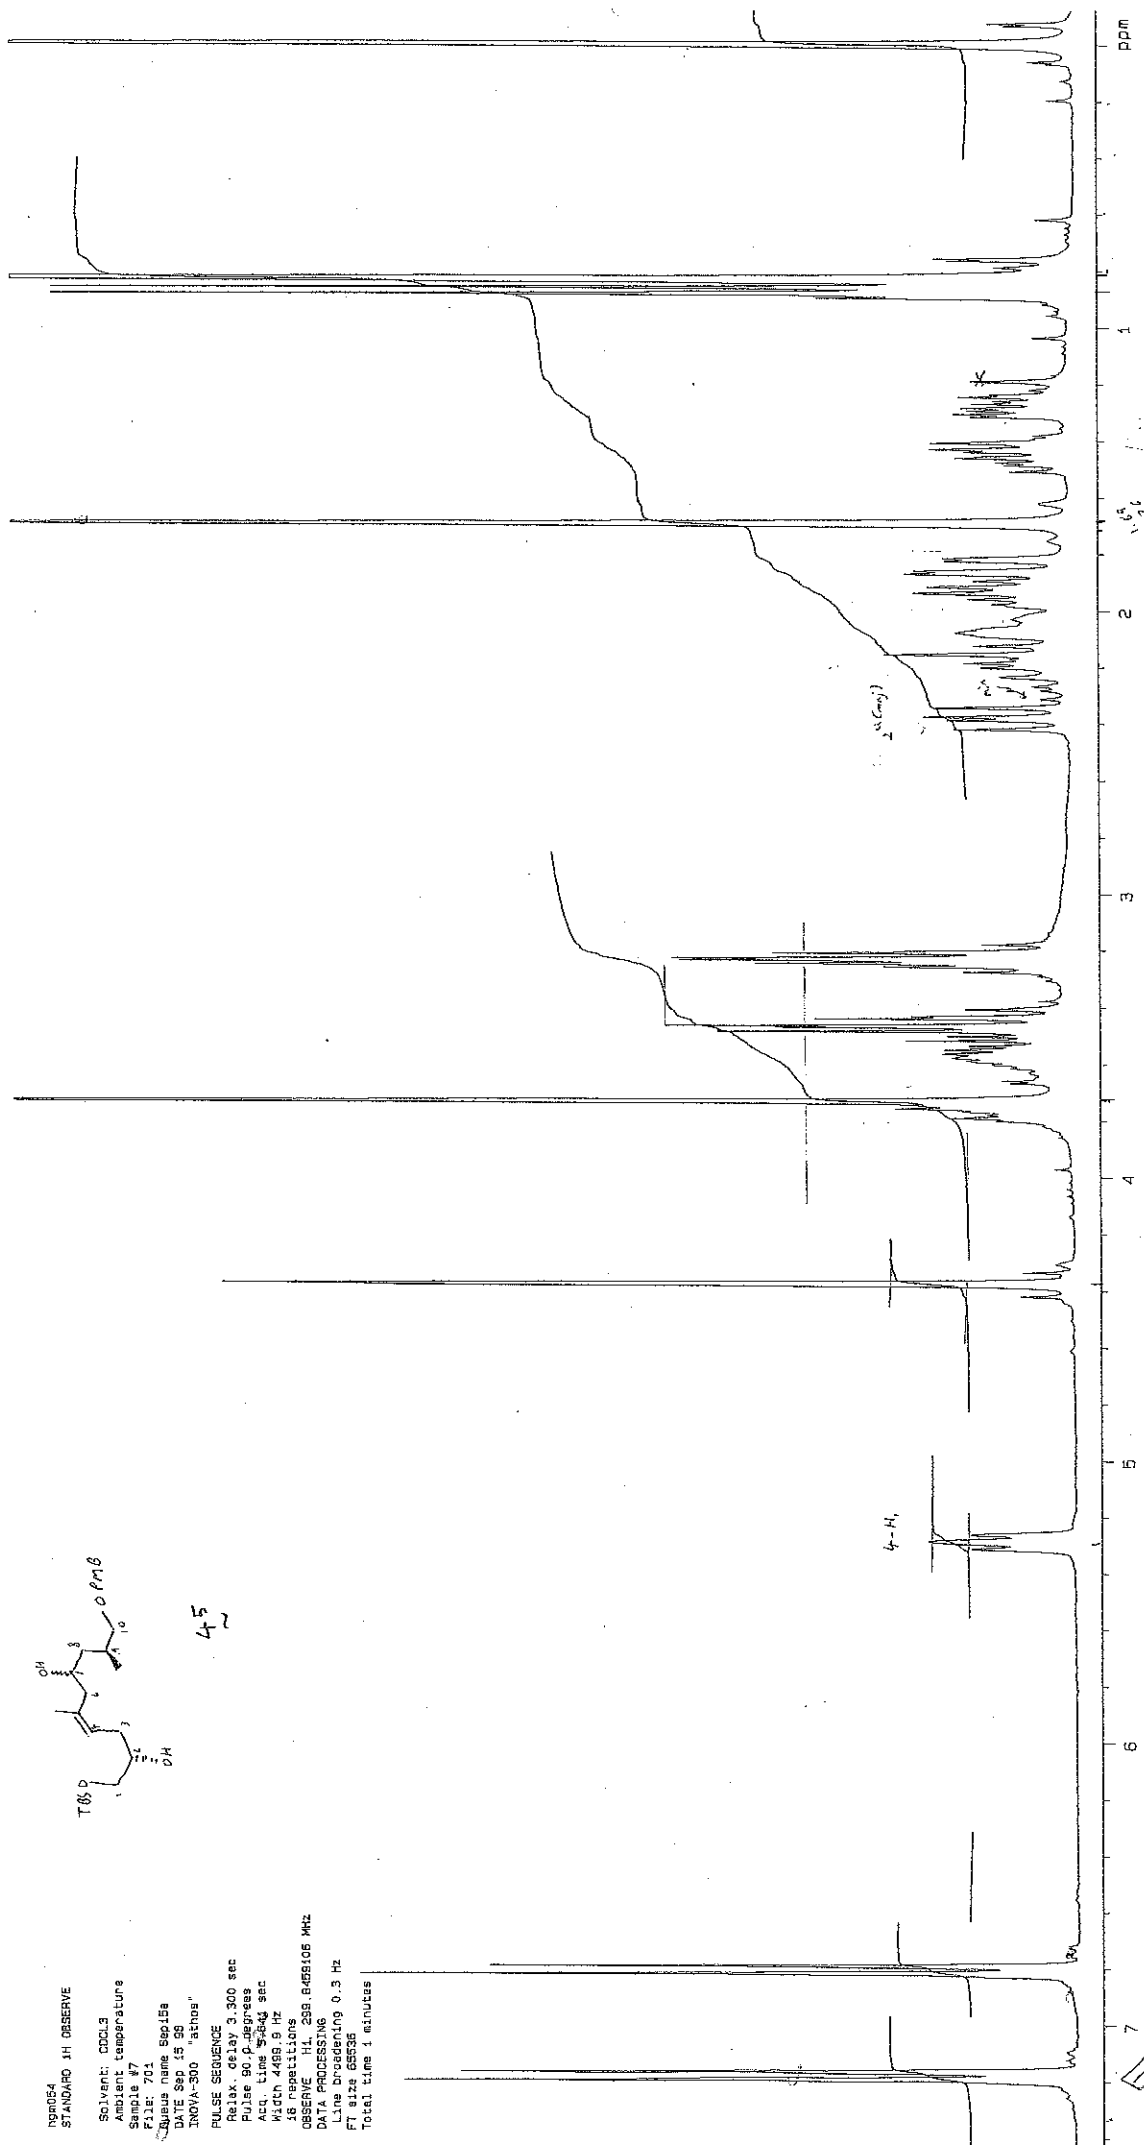

3.22  
3.74

5.30

0.07  
0.84

45

nm054  
 STANDARD 1K OBSERVE

Solvent: CDCl3  
 Ambient temperature  
 Sample #34  
 File: 1402  
 Queue name Sep14a  
 DATE Sep 14 98  
 INOVA-300 "athos"  
 PULSE SEQUENCE  
 Pulse 45.0 degrees  
 Acq. time 1.638 sec  
 Width 20000.0 Hz  
 304 repetitions  
 OBSERVE C13, 75.3963141 MHz  
 DECOUPLE H1, 299.8473785 MHz  
 Power 40 dB  
 continuously on  
 WALTZ-16 modulated  
 DATA PROCESSING  
 Line broadening 1.0 Hz  
 Fw size 65536  
 Total time 8 minutes

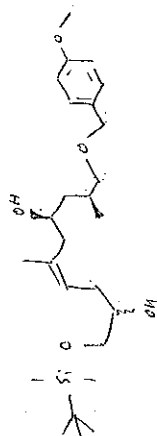

45

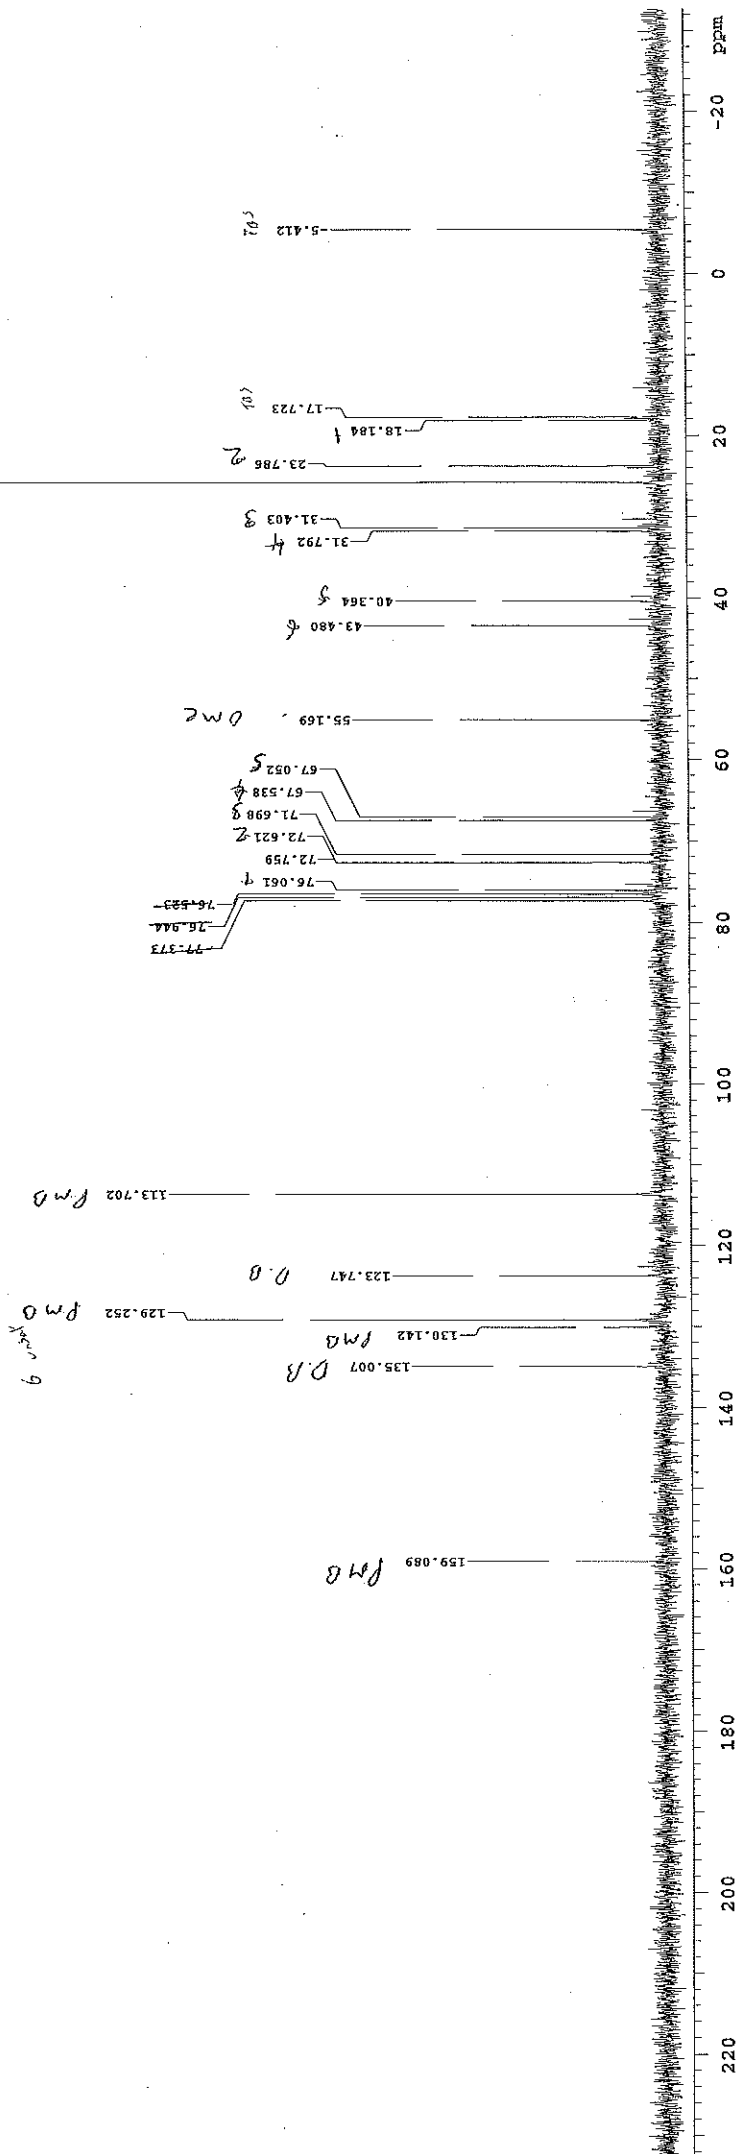



nmr 111  
 STANDARD 1H OBSERVE

Solvent: CDCl3  
 Ambient temperature  
 Sample #49  
 File: 4901  
 Queue name Sep08a  
 DATE Sep 8 00  
 INOVA-300 "atmos"

PULSE SEQUENCE  
 Relax. delay 3.300 sec  
 Pulse 90.0 degrees  
 Acq. time 3.641 sec  
 Width 4499.9 Hz  
 16 repetitions

OBSERVE XL, 299.8458942 MHz  
 Data broadening 0.3 Hz  
 FT size 65536  
 Total time 1 minutes

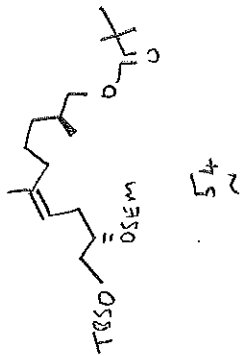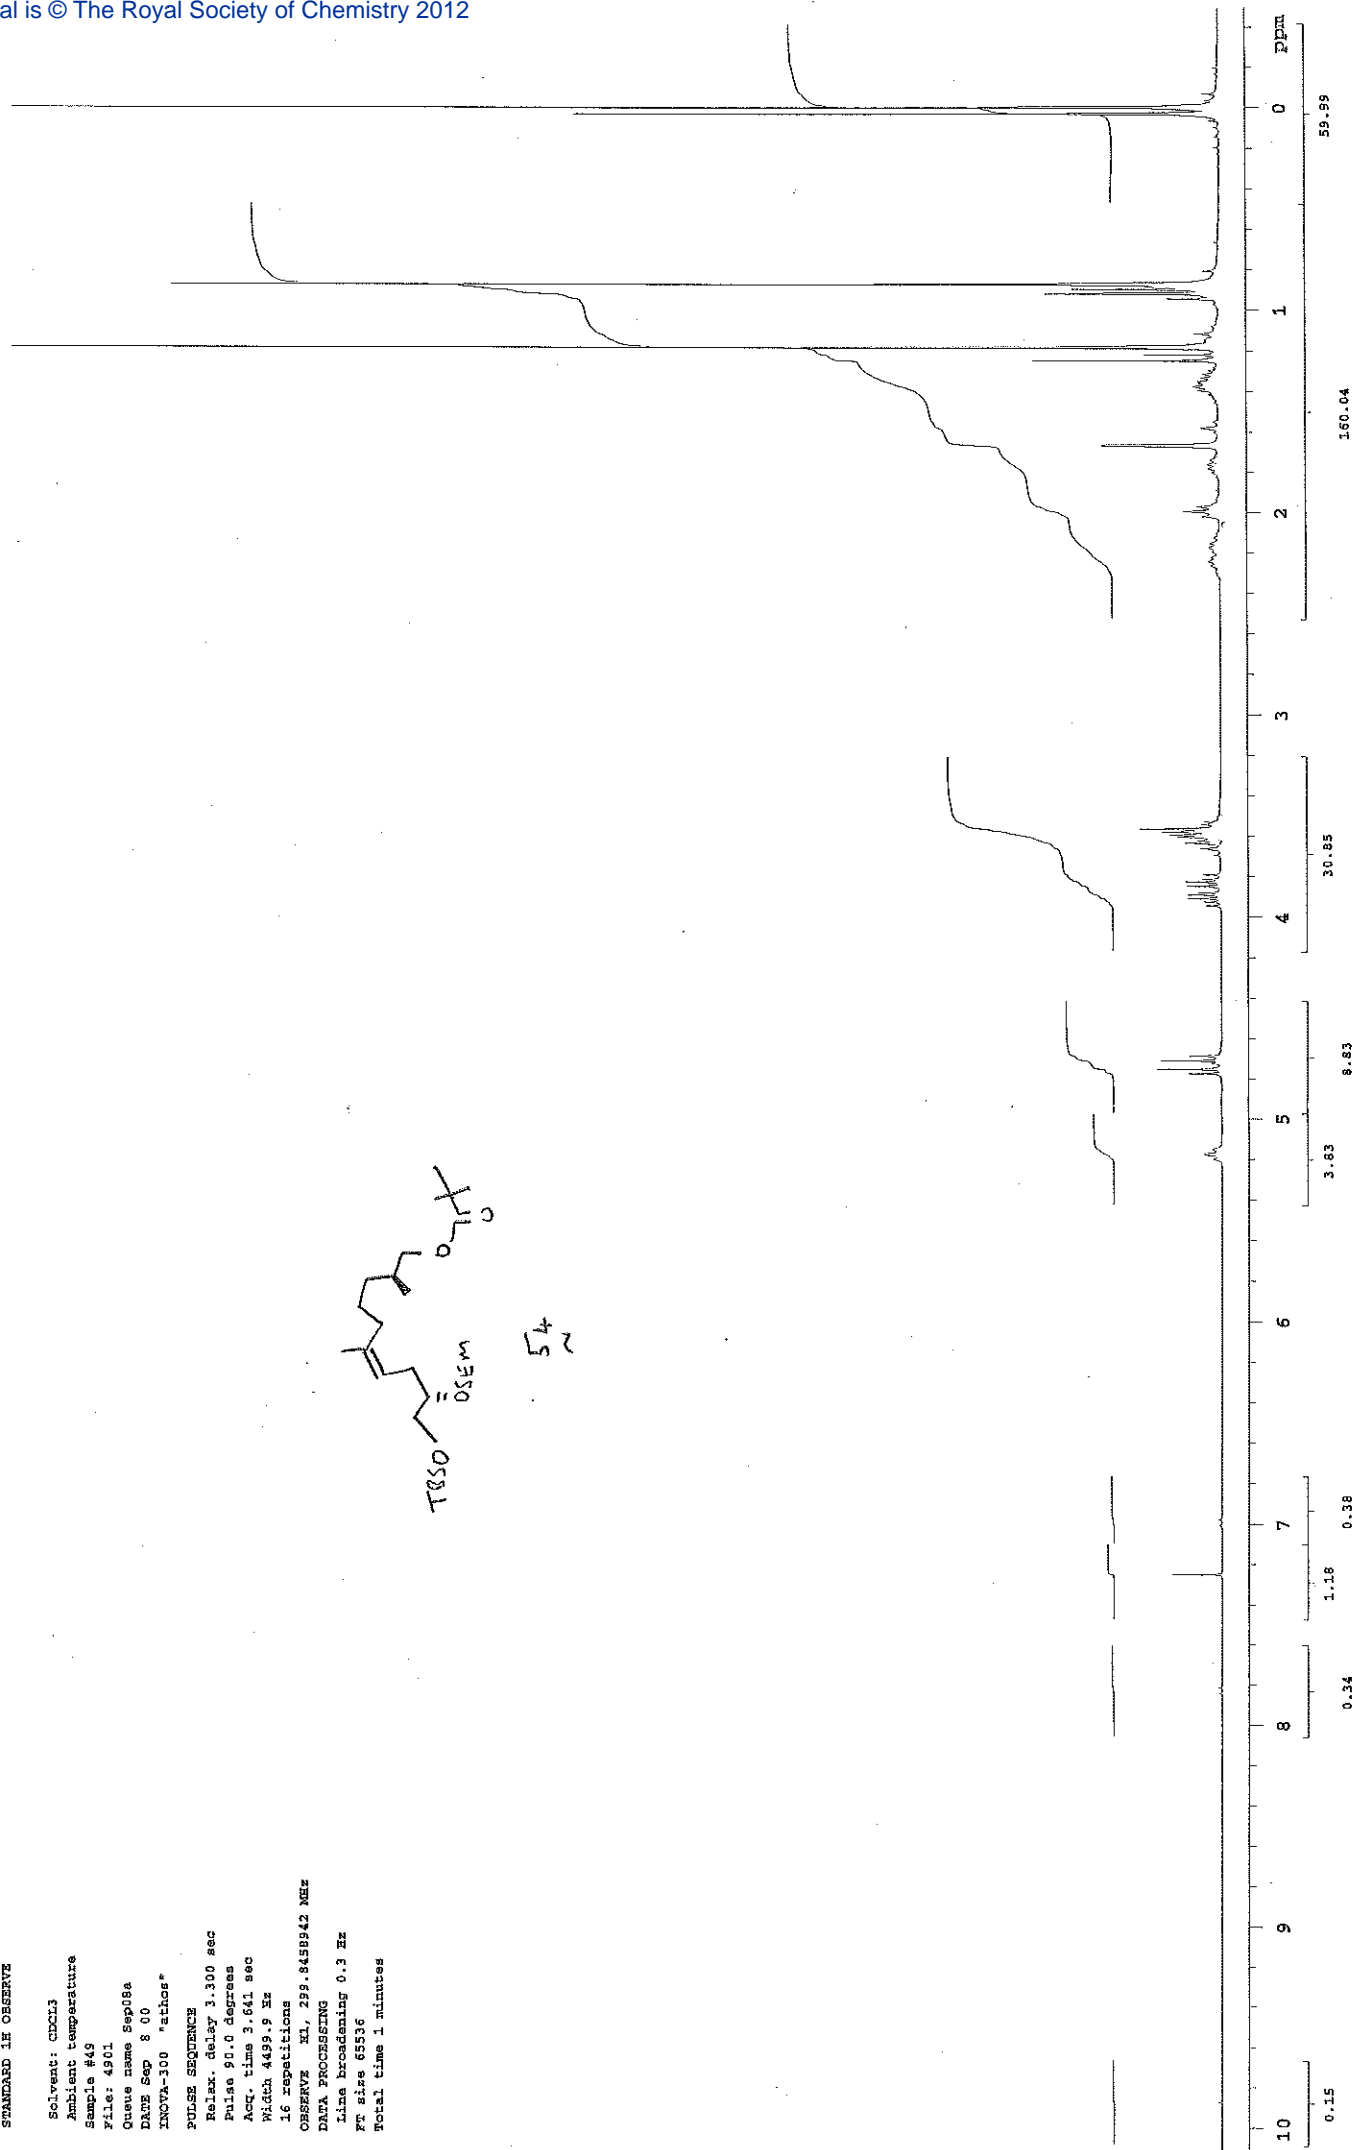

piv on deoxy  
 13C OBSERVE

Solvent: CDCL3  
 Ambient temperature  
 Sample #4  
 File: 401  
 Queue name Aug26a  
 DATE\_08\_26\_00  
 INOVA-300 "athos"  
 PULSE SEQUENCE  
 Pulse 45.0 degrees  
 Acq. time 1.638 sec  
 Width 20000.0 Hz  
 432 repetitions  
 OBSERVE C13, 75.3963141 MHz  
 DECOUPLE H1, 299.8473785 MHz  
 Power 40 dB  
 continuously on  
 WALTZ-16 modulated  
 DATA PROCESSING  
 Line broadening 1.0 Hz  
 FT size 65536  
 Total time 11 minutes

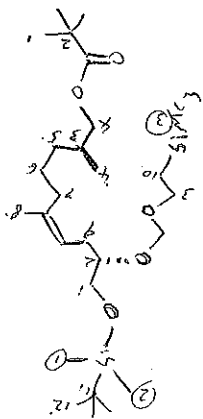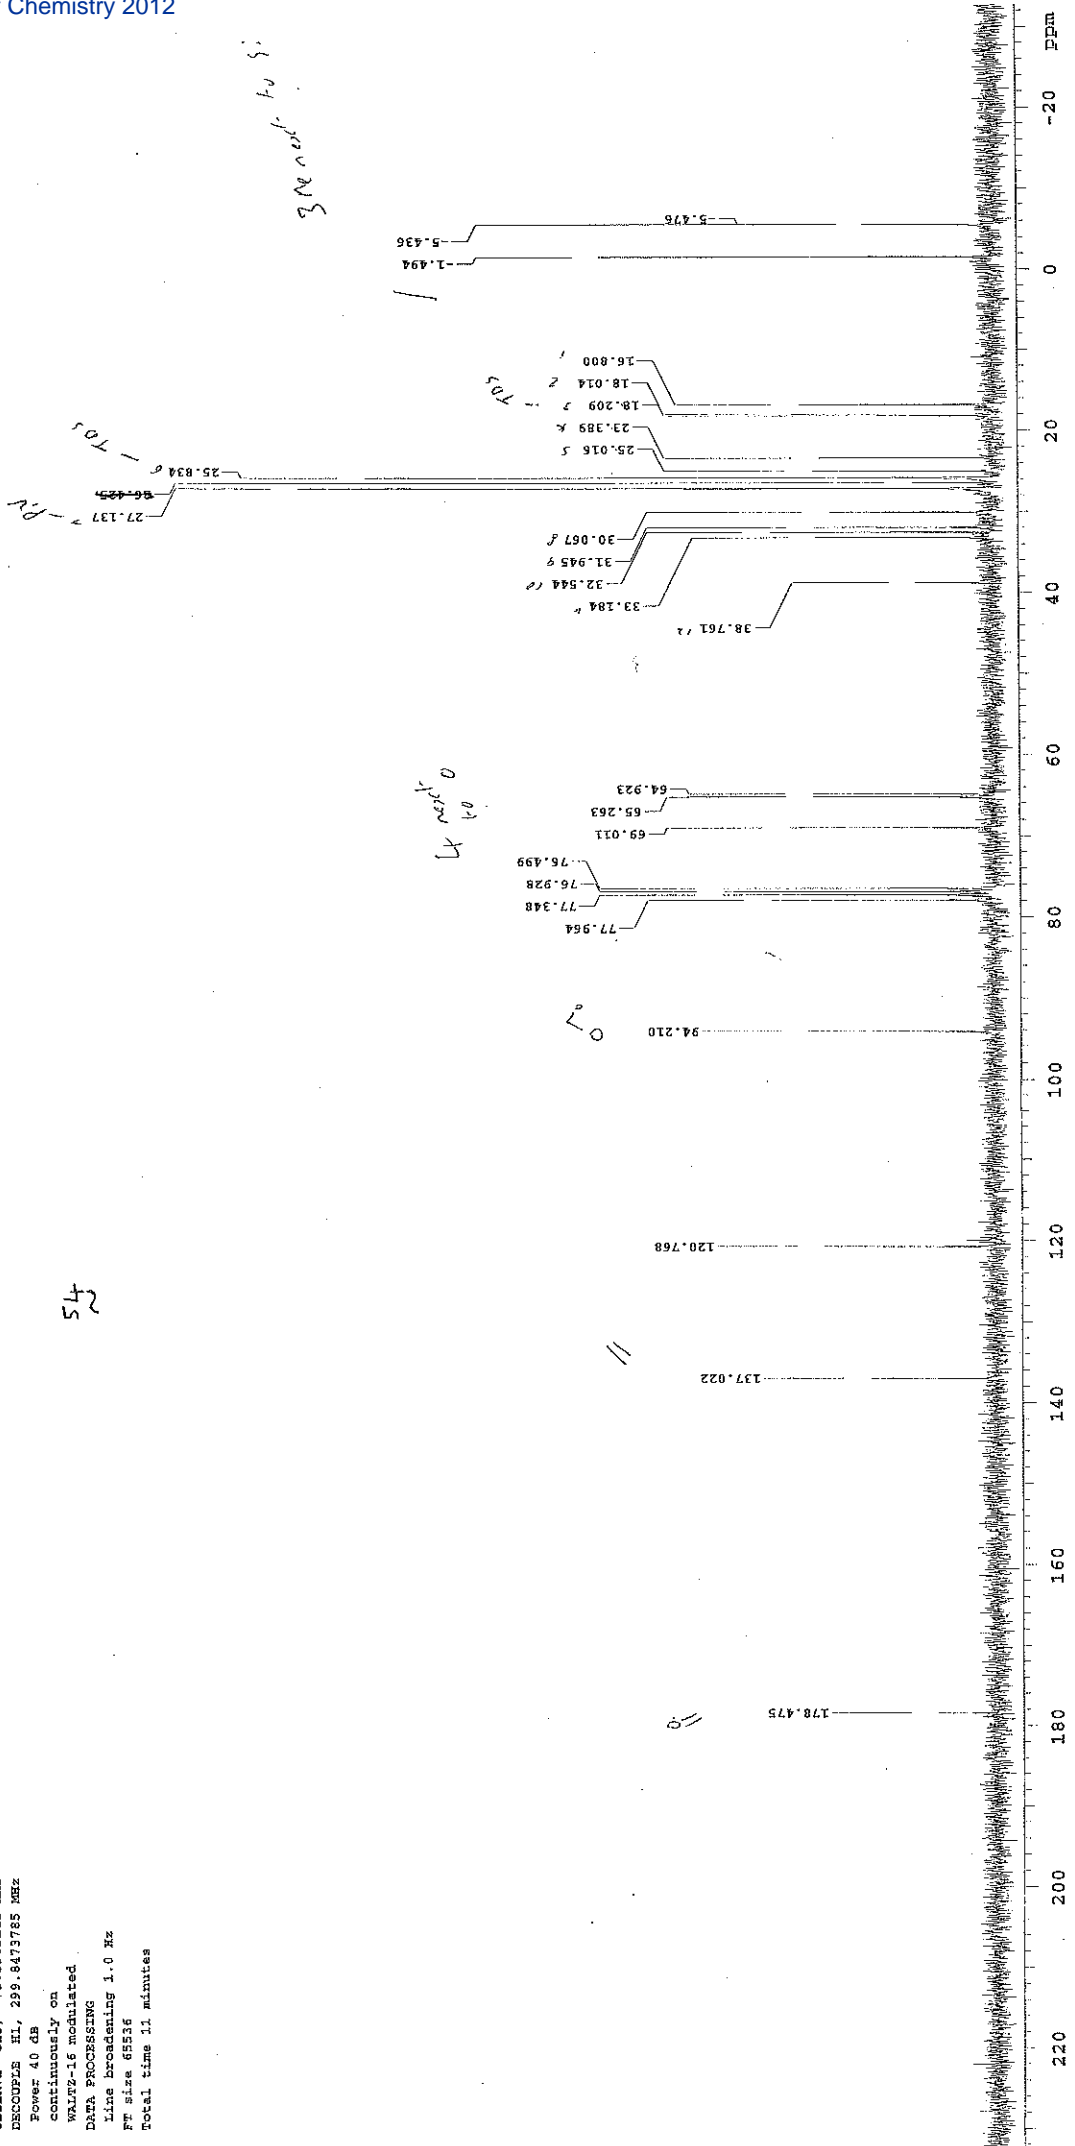

300 MHz  
 100

175  
 170

180

nm 115 and pink spot  
STANDARD IR OBSERVE

Solvent: CDCl3  
Ambient temperature  
Sample #26  
File: 2601  
Queue name Sep08a  
DATE Sep 8 00  
INOVA-300 "athos"

PULSE SEQUENCE  
Relax. delay 3.300 sec  
Pulse 90.0 degrees  
Acq. time 3.641 sec  
Width 499.9 Hz  
16 repetitions  
OBSERVE F1, 299.8458949 MHz  
DATA PROCESSING  
Line broadening 0.3 Hz  
PT size 65536  
Total time 1 minutes

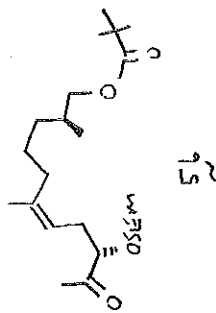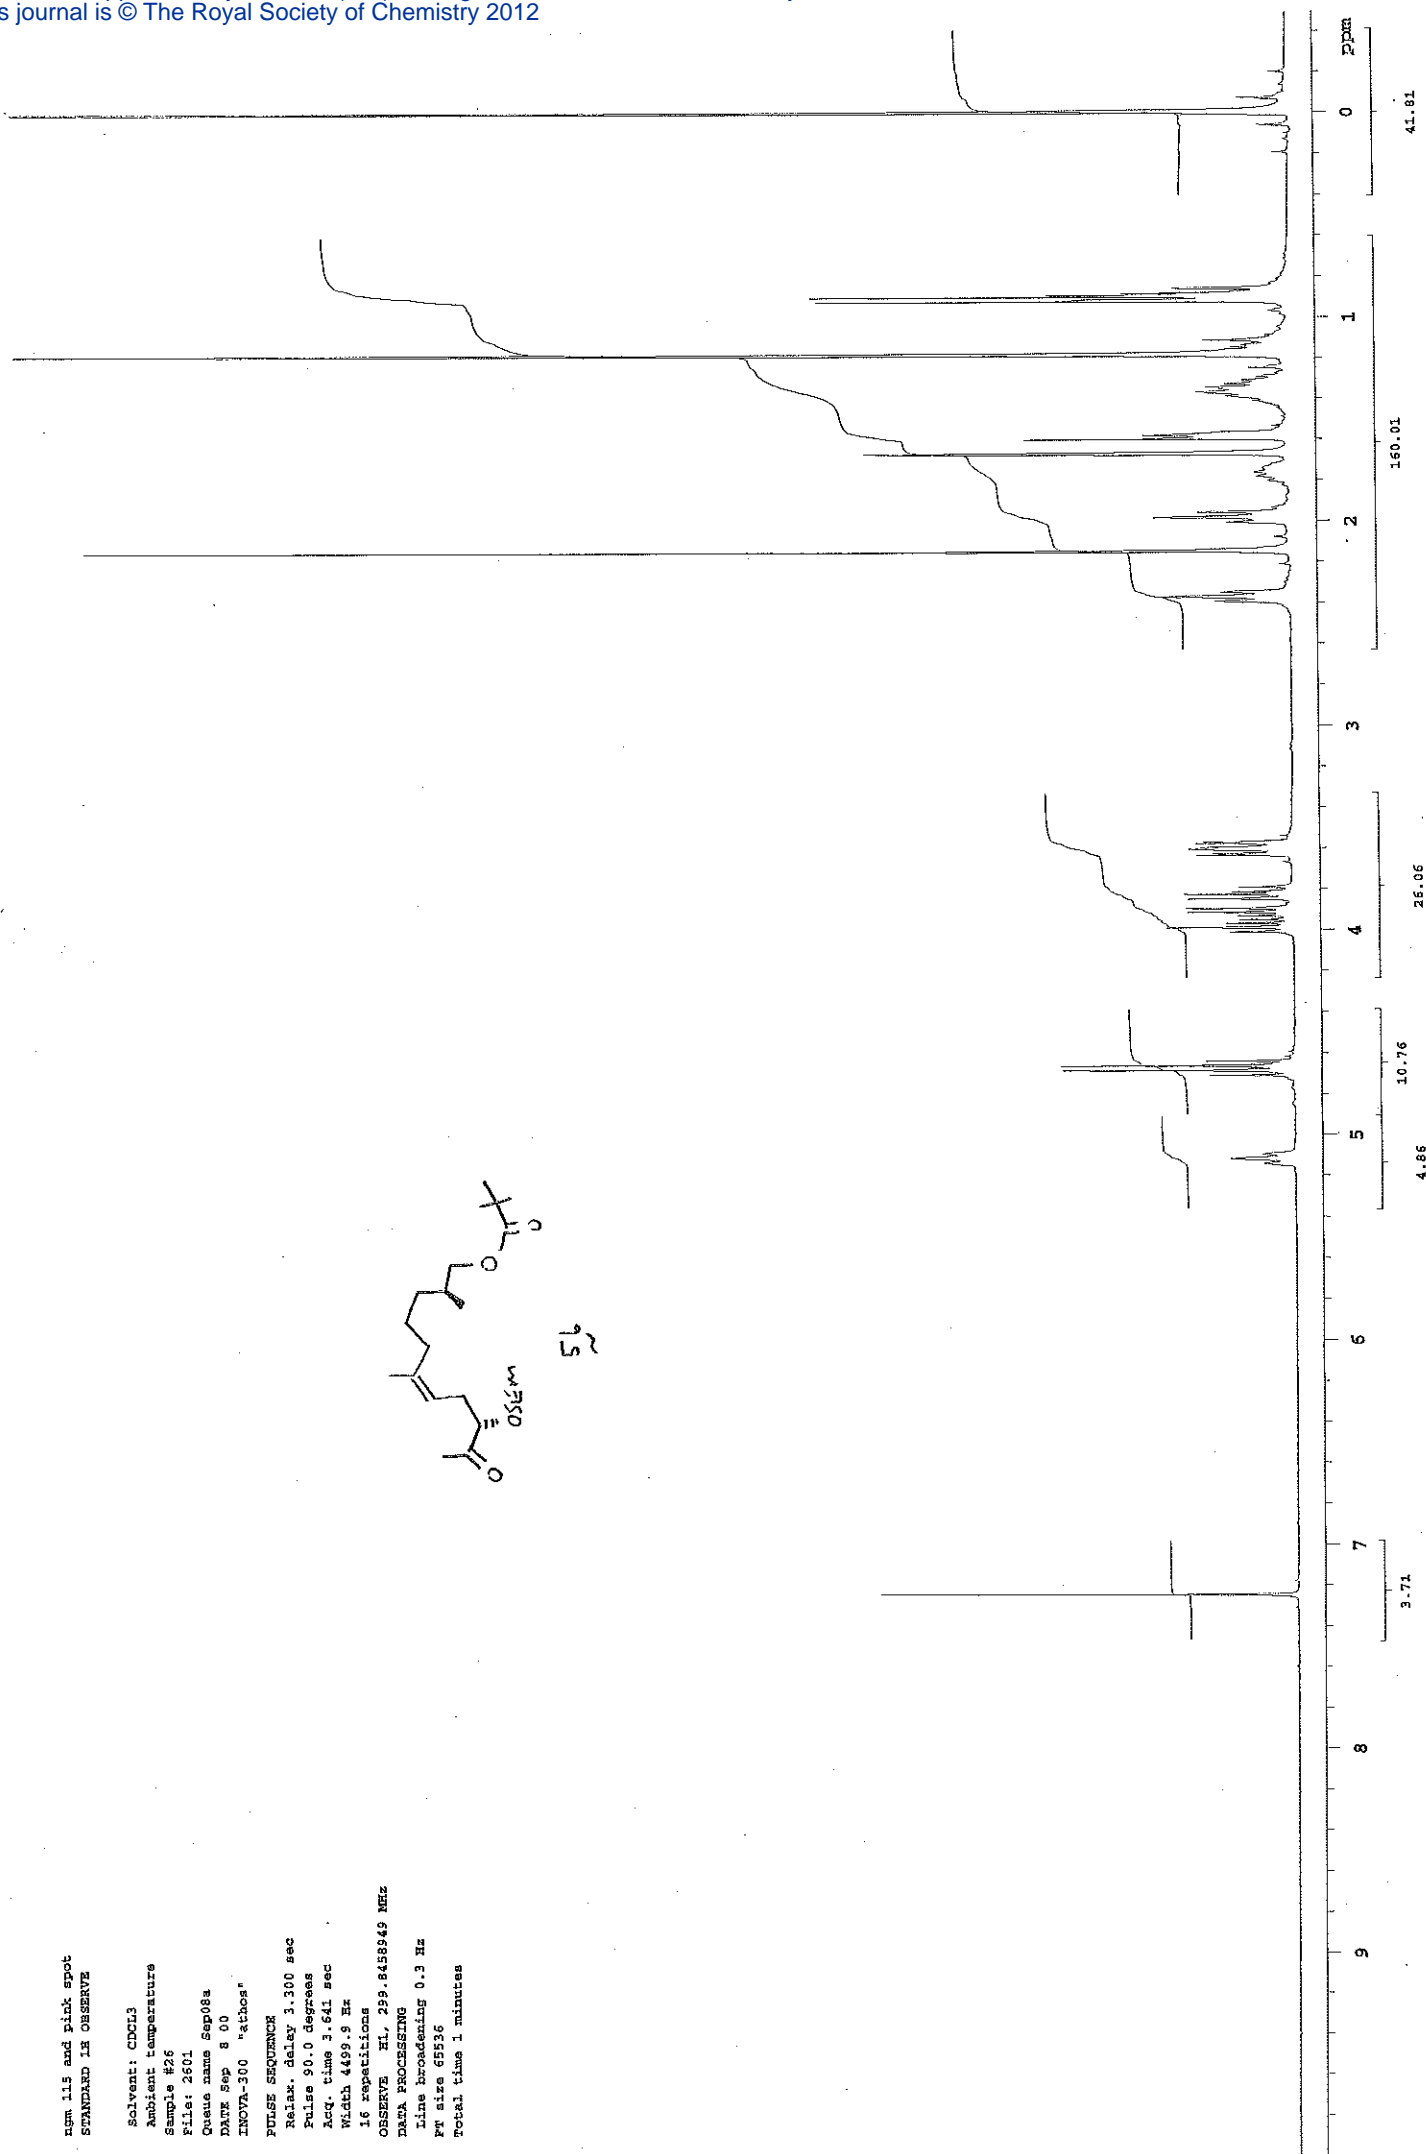

zgpg115  
13C OBSERVE

Solvent: CDCl3  
Ambient temperature  
Sample #2  
File: 201  
Queue name Sep08a  
DATE Sep 8 00  
INOVA-300 "athos"

PULSE SEQUENCE

Pulse 45.0 degrees  
Acq. time 1.638 sec  
Width 20000.0 Hz  
4096 repetitions  
OBSERVE CH3, 75.3963141 MHz  
DECUPLE H1, 289.8473785 MHz  
Power 40 dB  
continually on  
WALTZ-16 modulated  
DATA PROCESSING  
Line broadening 1.0 Hz  
Ft size 65536  
Total time 111 minutes

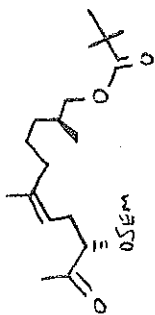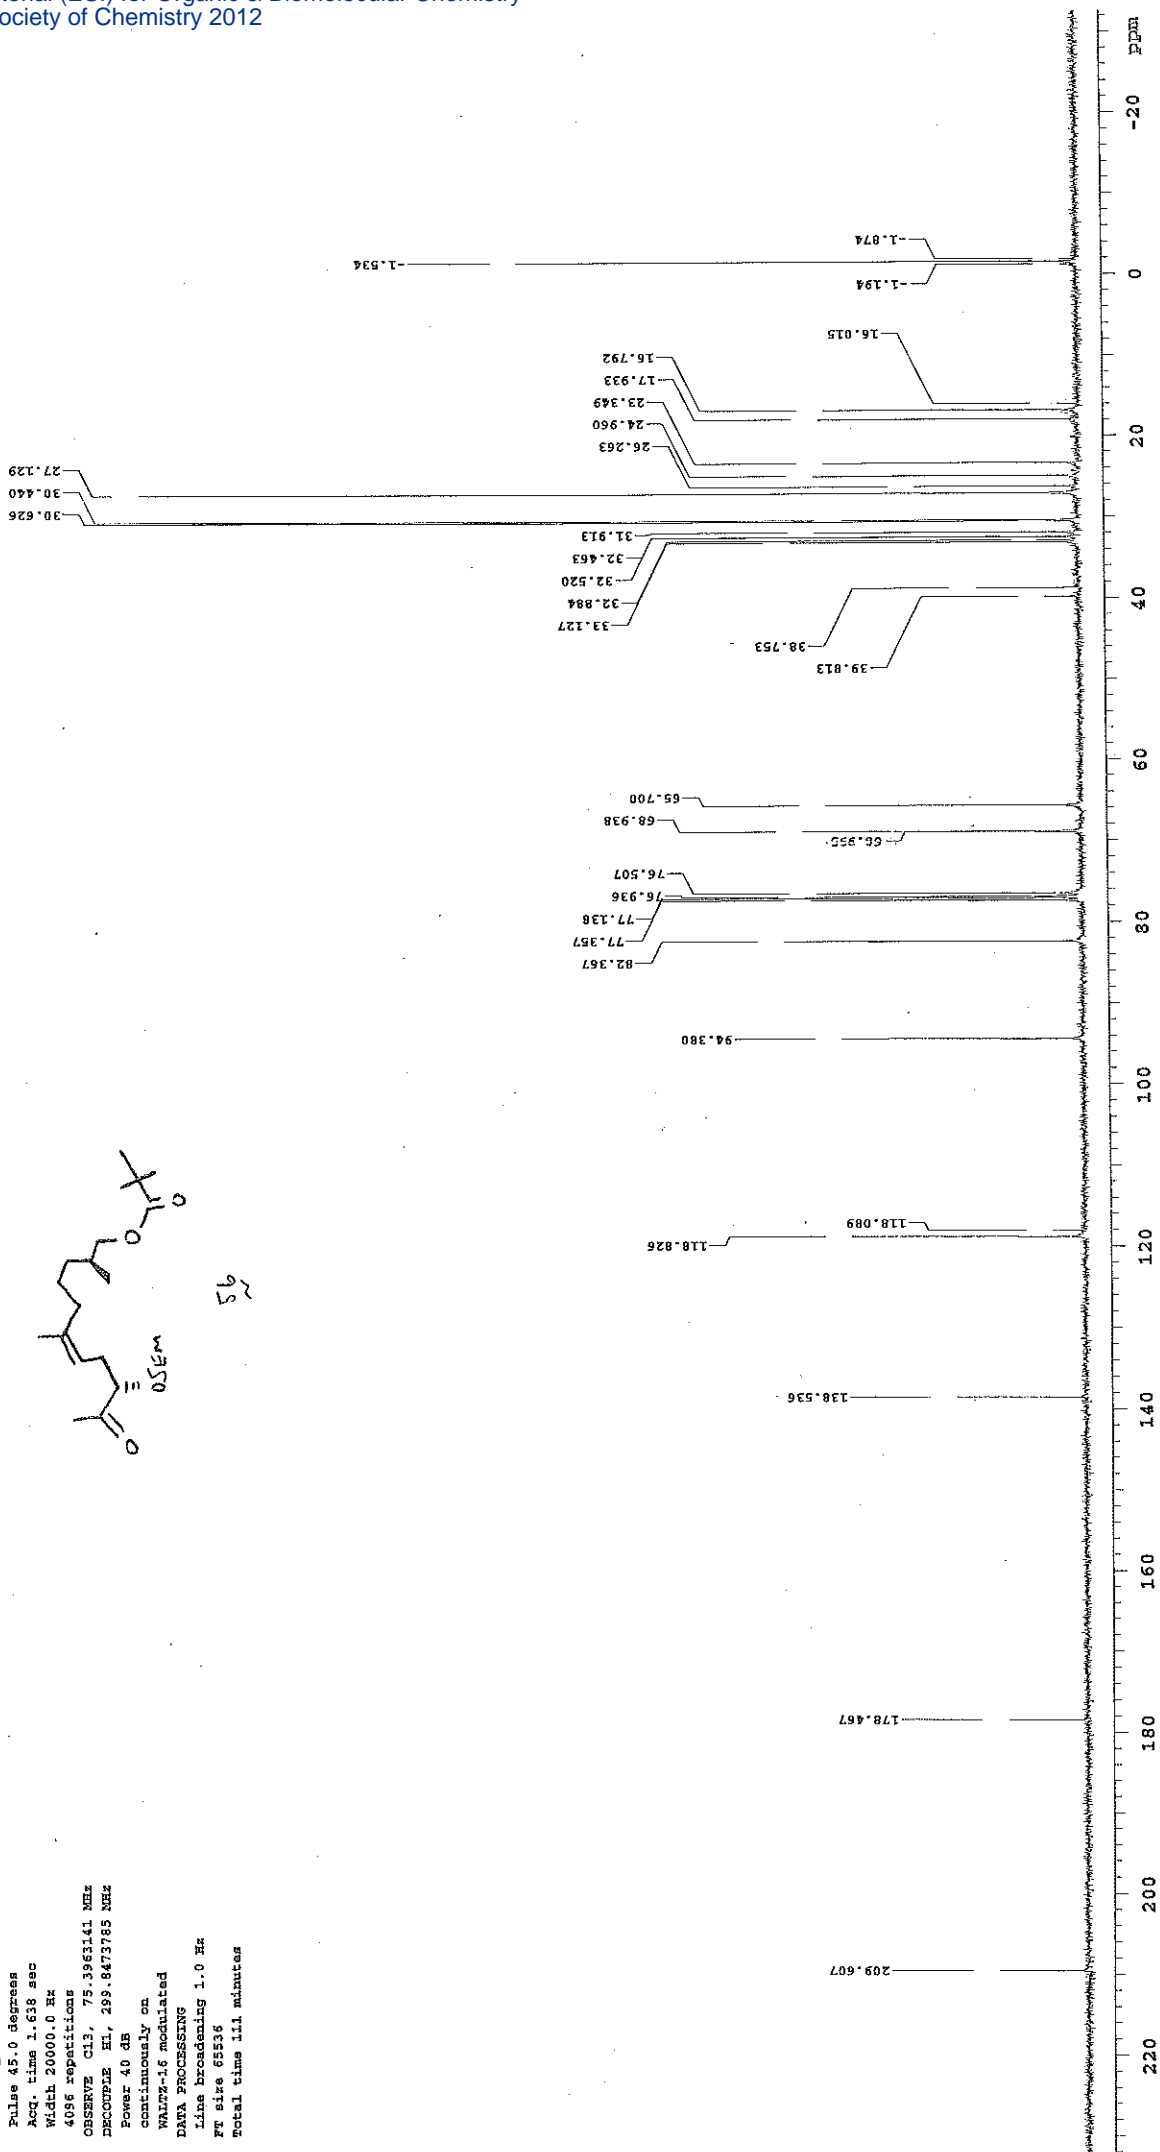

thiaz oh  
STANDARD 1K OBSERVE

Solvent: CDCl3  
Ambient temperature  
Sample #9  
File: 901  
Chemu nama Nov07a  
DATE Nov 7 00  
INOVA-300 "athos"

PULSE SEQUENCE  
Relax. delay 3.300 sec  
Pulse 90.0 degrees  
Acq. time 3.641 sec  
Width 4499.9 Hz  
16 repetitions

OBSERVE F1, 299.8458883 MHz  
DATA PROCESSING  
Line broadening 0.3 Hz  
FT size 65536  
Total time 1 minutes

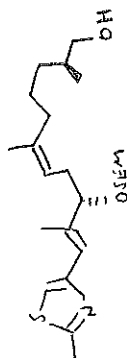

58

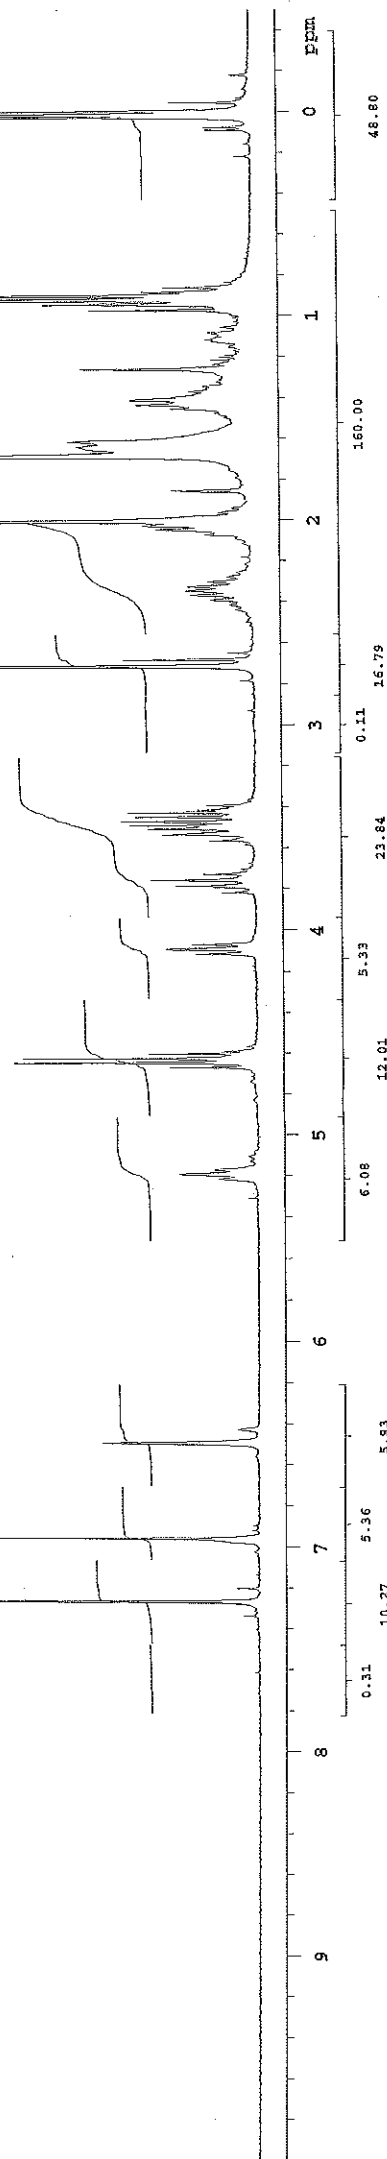

mat martin piy oh  
13C OBSERVE

Solvent: CDCl3  
Ambient temperature  
Sample #15  
File: 1601  
Queue name Sep17a  
Date Sep 17 00  
INOVA-300 \*athos\*

PULSE SEQUENCE  
Pulse 45.0 degrees  
Acq. time 1.638 sec  
Width 20000.0 Hz  
4096 repetitions  
OBSERVE CH3, 75.3963141 MHz  
DECOUPLE H1, 299.8473785 MHz  
continuously on  
Power 40 dB  
WALTZ-16 modulated  
DATA PROCESSING  
Line broadening 1.0 Hz  
FT size 65536  
Total time 111 minutes

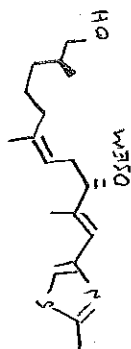

25

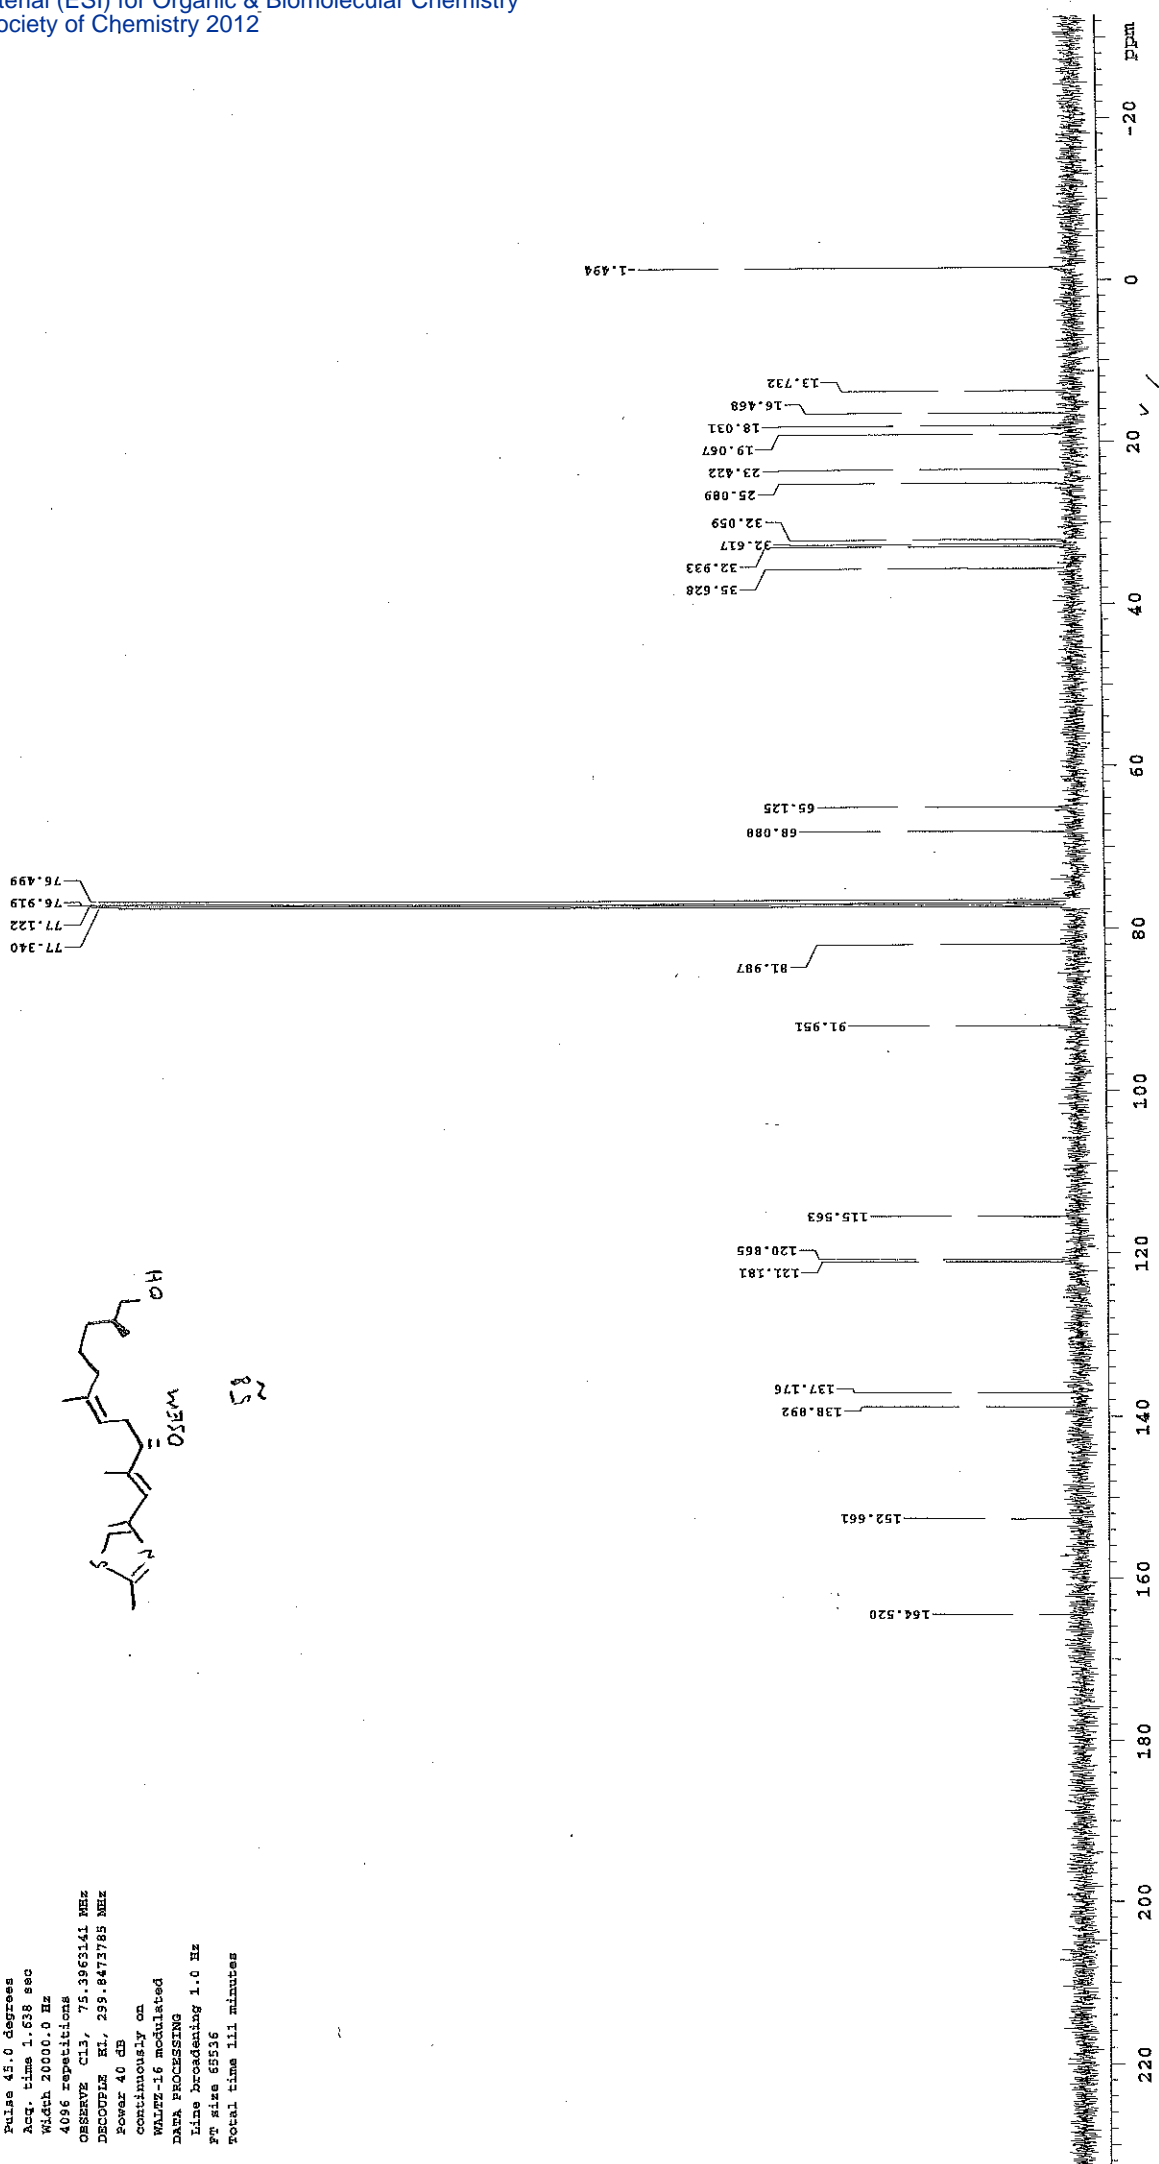

N Martin  
DMT KETONE  
c6d6  
Inova 400 (RS)  
Aramis  
Proton 400MHz  
09.11.00  
477

Pulse Sequence: s2pul

Solvent: c6d6  
Ambient temperature  
User: 1-12-87  
File: 477-09-11-NK-RS  
INOVA-400 "aramis"

PULSE SEQUENCE  
Relax. delay 5.000 sec  
Pulse 36.0 degrees  
Acq. time 3.998 sec  
Width 5602.2 Hz

16 repetitions  
OBSERVE H1, 199.9584843 MHz  
DATA PROCESSING  
FT size 65536  
Total time 2 min, 24 sec

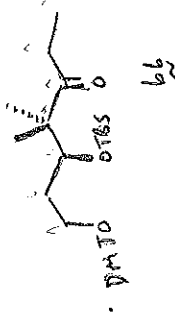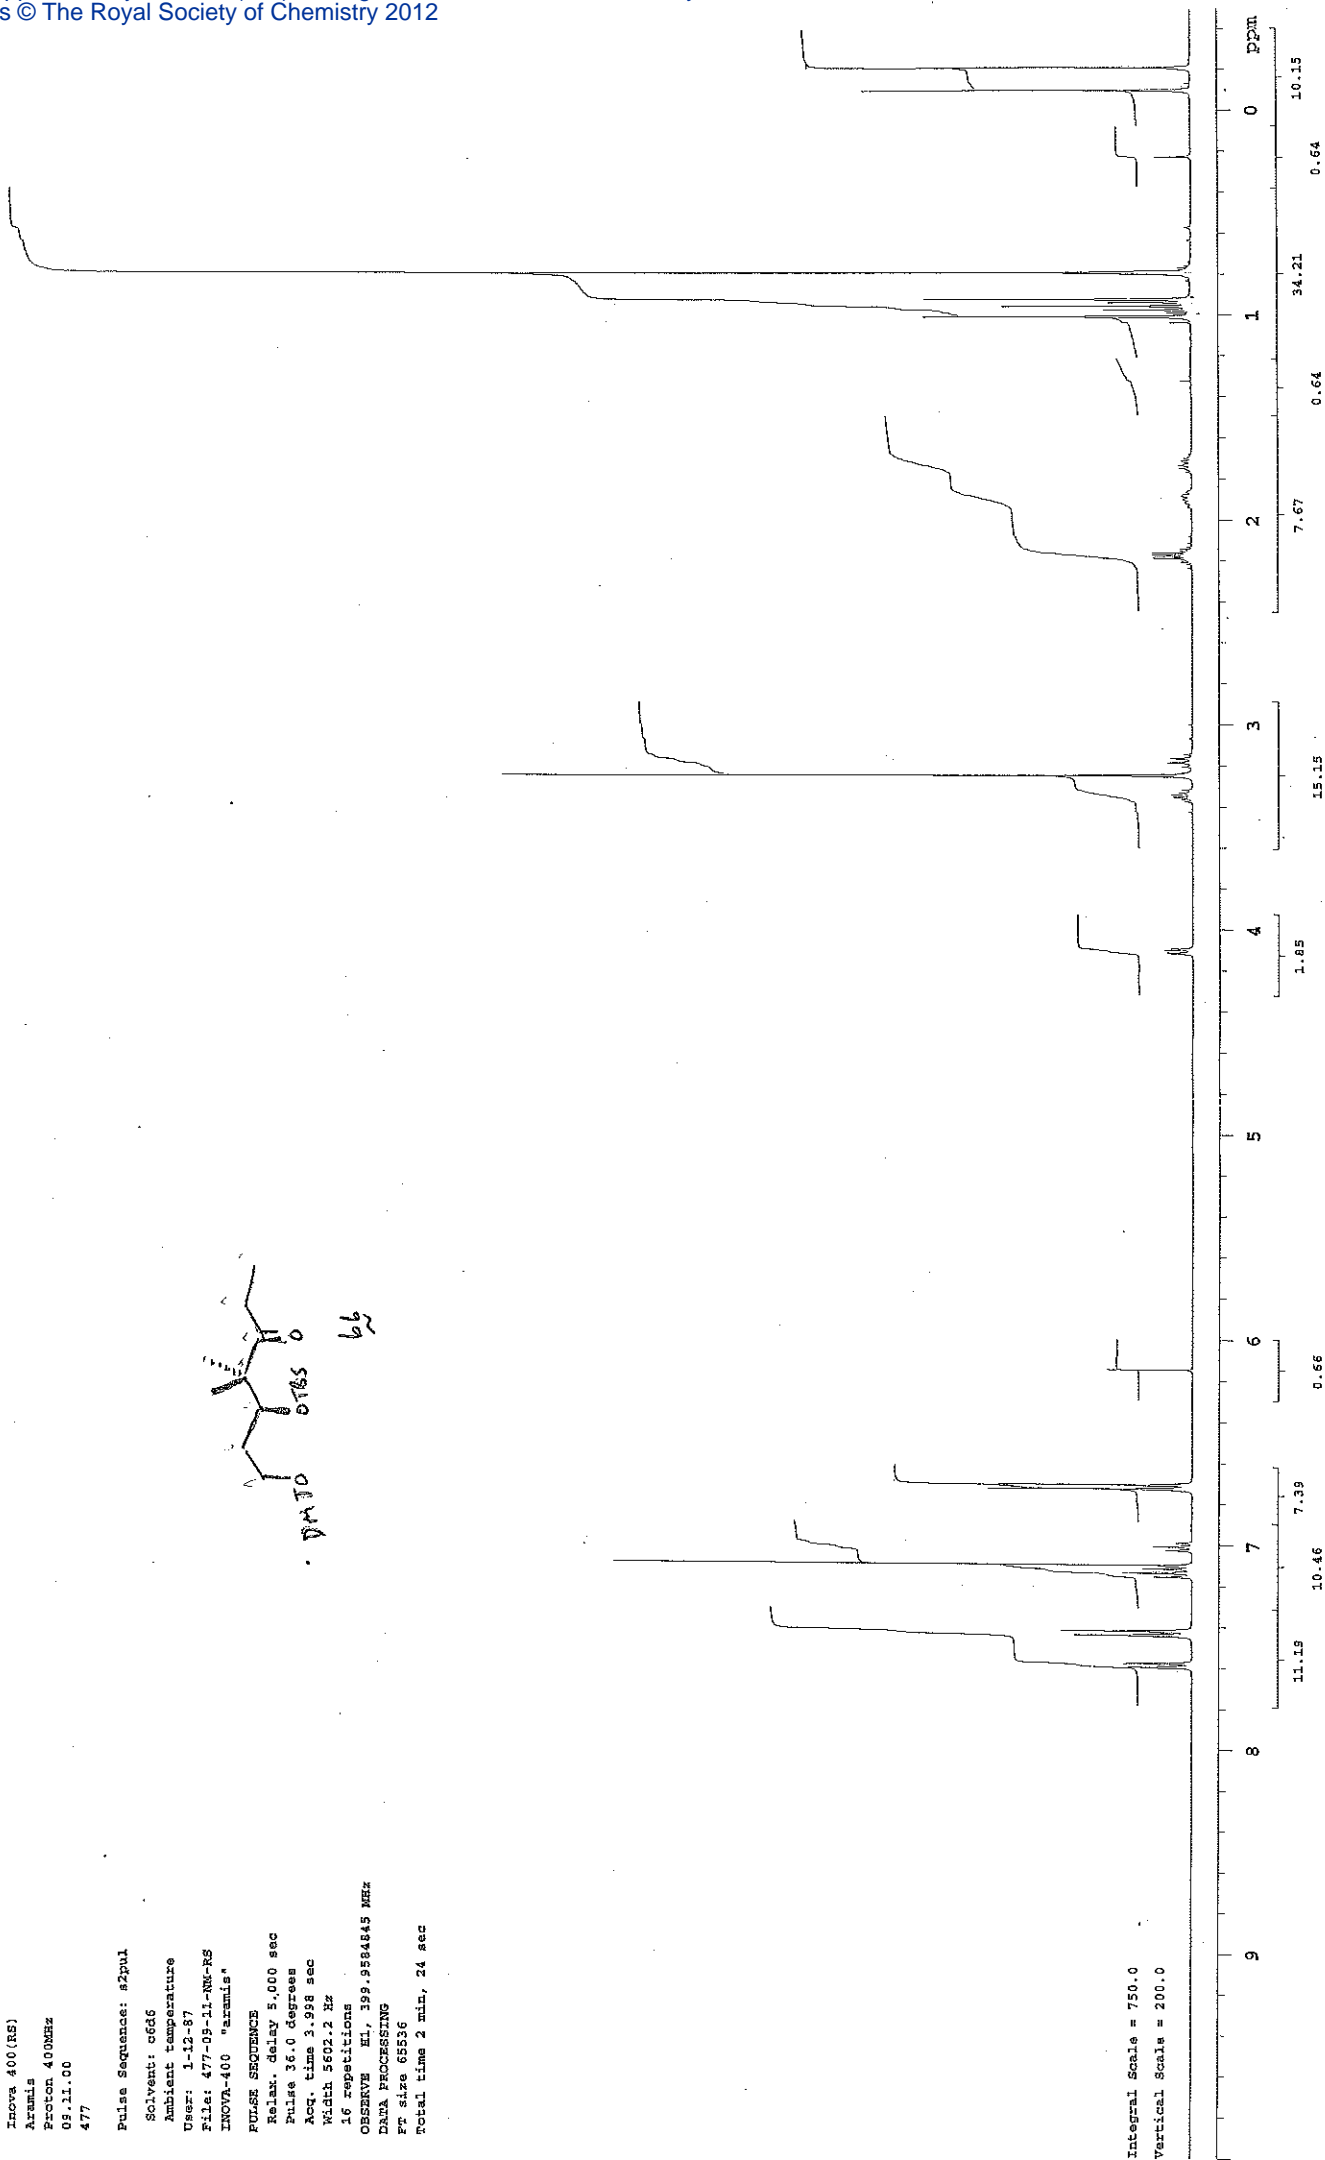

dmt ket  
 13C OBSERVE  
 Solvent: CDCl<sub>3</sub>  
 Ambient temperature  
 Sample #18  
 File: 1801  
 Coeus name Jan03a  
 DATE Jan 3 01  
 INOVA-300 "athos"  
 PULSE SEQUENCE  
 Pulse 45.0 degrees  
 Acq. time 1.638 sec  
 Width 20000.0 Hz  
 176 repetitions  
 OBSERVE C13, 75.3963209 MHz  
 DECOUPLE H1, 299.8474054 MHz  
 Power 40 dB  
 continuously on  
 WALTZ-16 modulated  
 DATA PROCESSING  
 Line broadening 1.0 Hz  
 FT size 65536  
 Total time 4 minutes

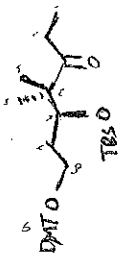

66

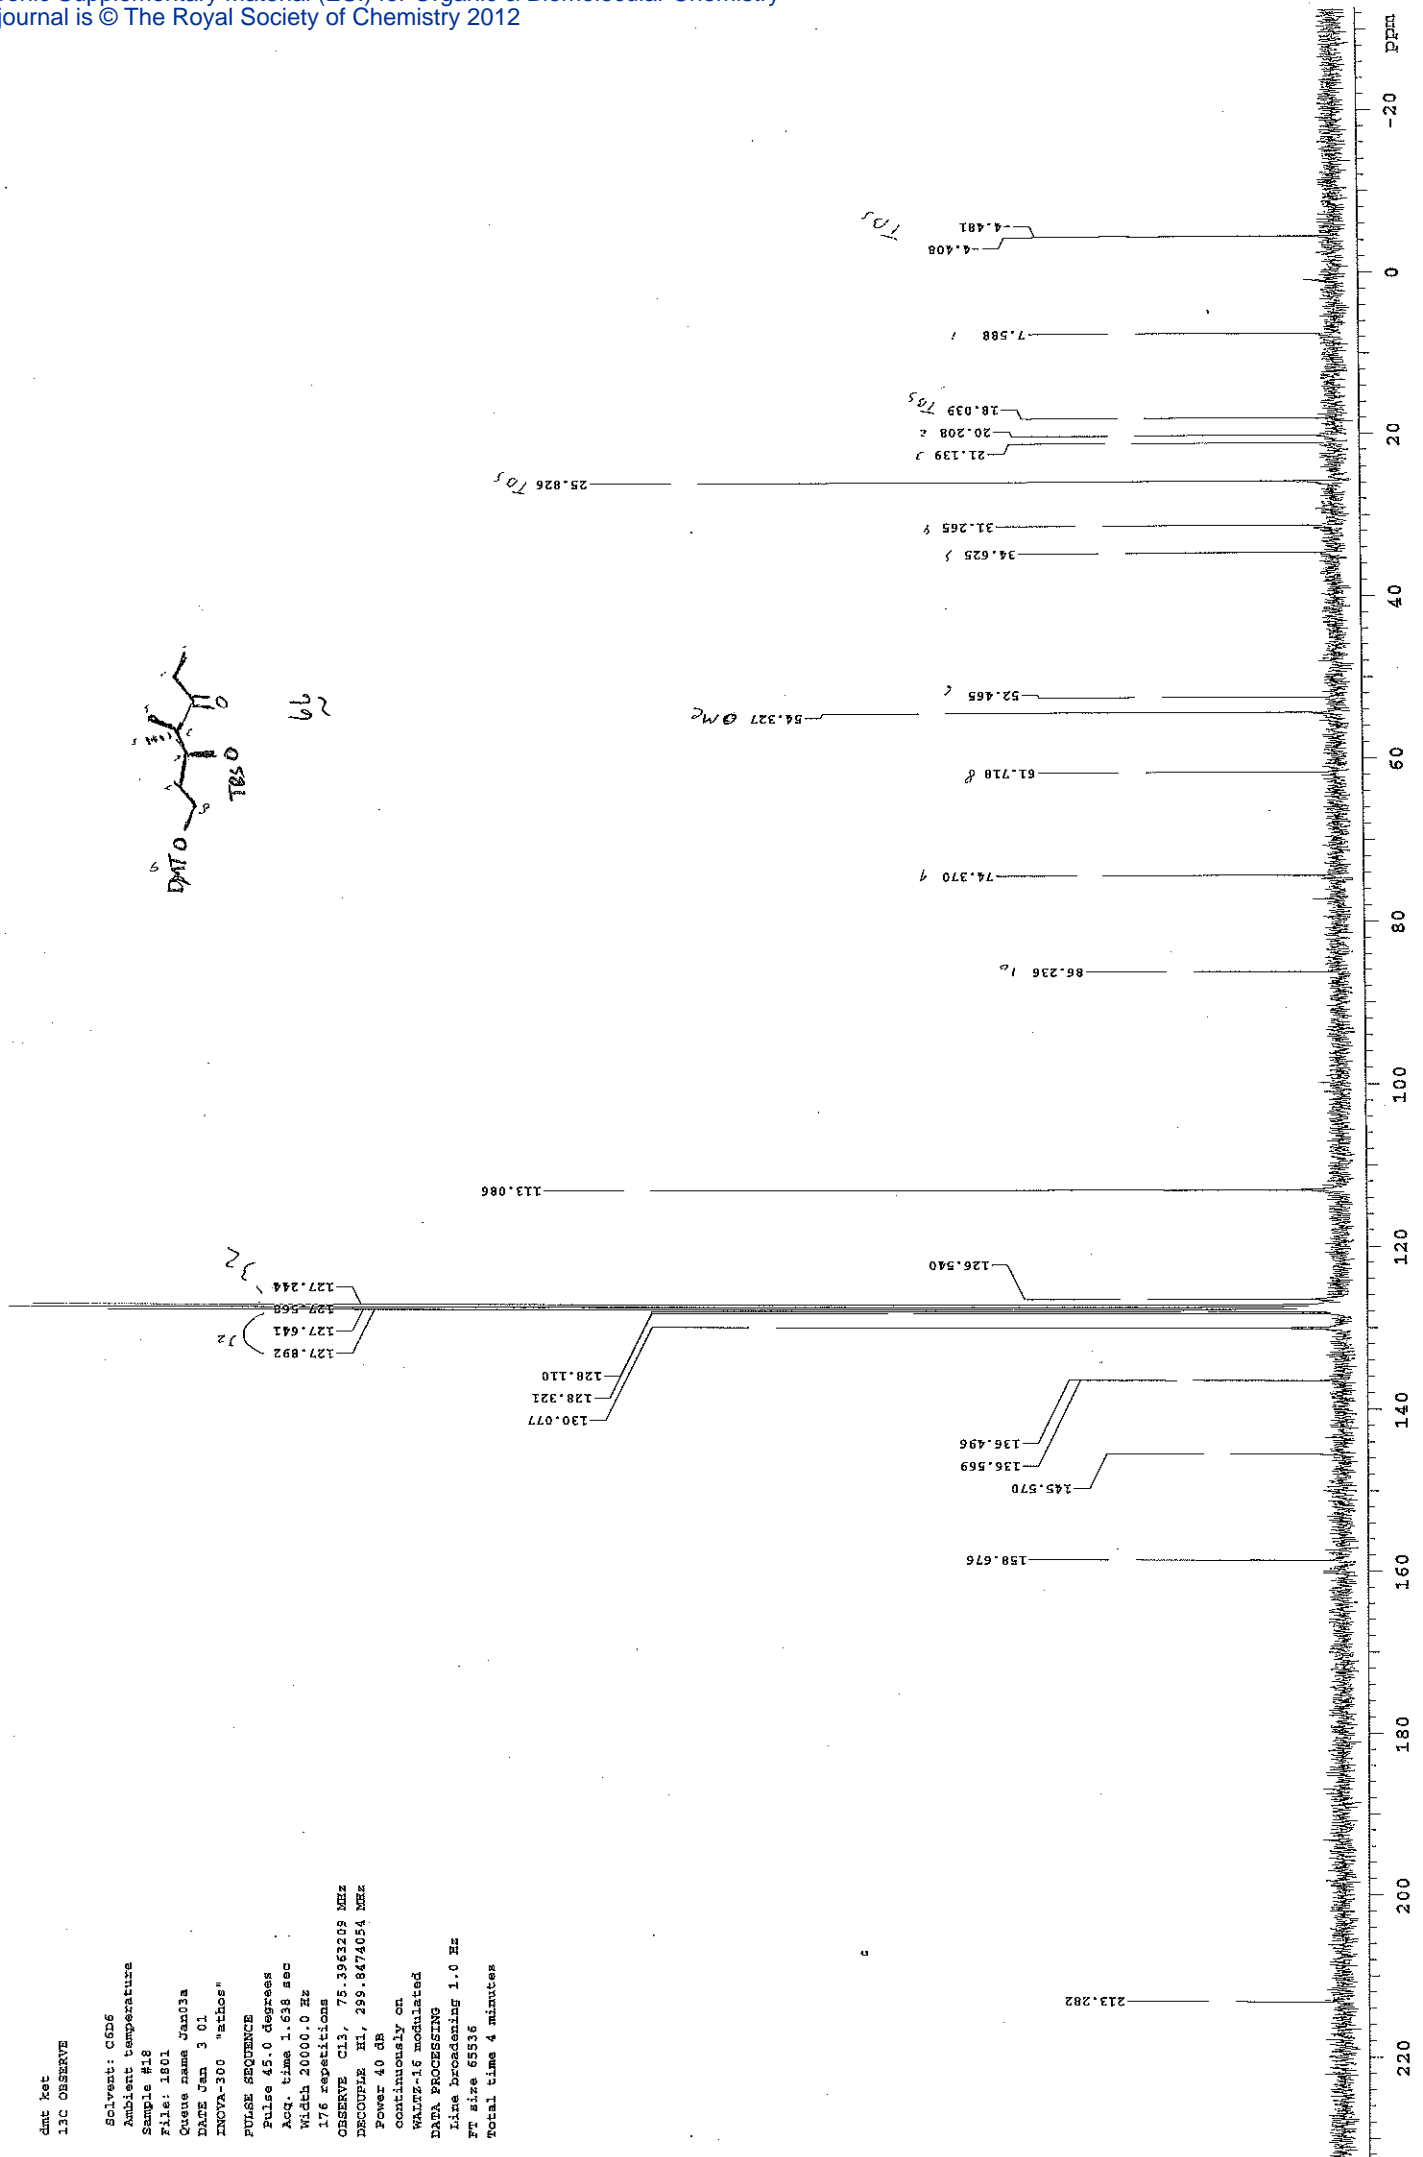



alsol c6d6  
STANDARD 1H OBSERVE

Solvent: C6D6  
Ambient temperature  
Sample #1  
File: 101  
Queue name Oct04a  
DATE Oct 4 00  
INNOVA-300 "athos"

PULSE SEQUENCE  
Relax. delay 3.300 sec  
Pulse 90.0 degrees  
Acq. time 3.641 sec  
Width 4499.9 Hz  
16 repetitions

OBSERVE HL, 299.8458622 MHz  
DATA PROCESSING  
Line Broadening 0.3 Hz  
Ft size 65536  
Total time 1 minutes

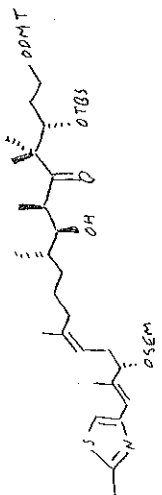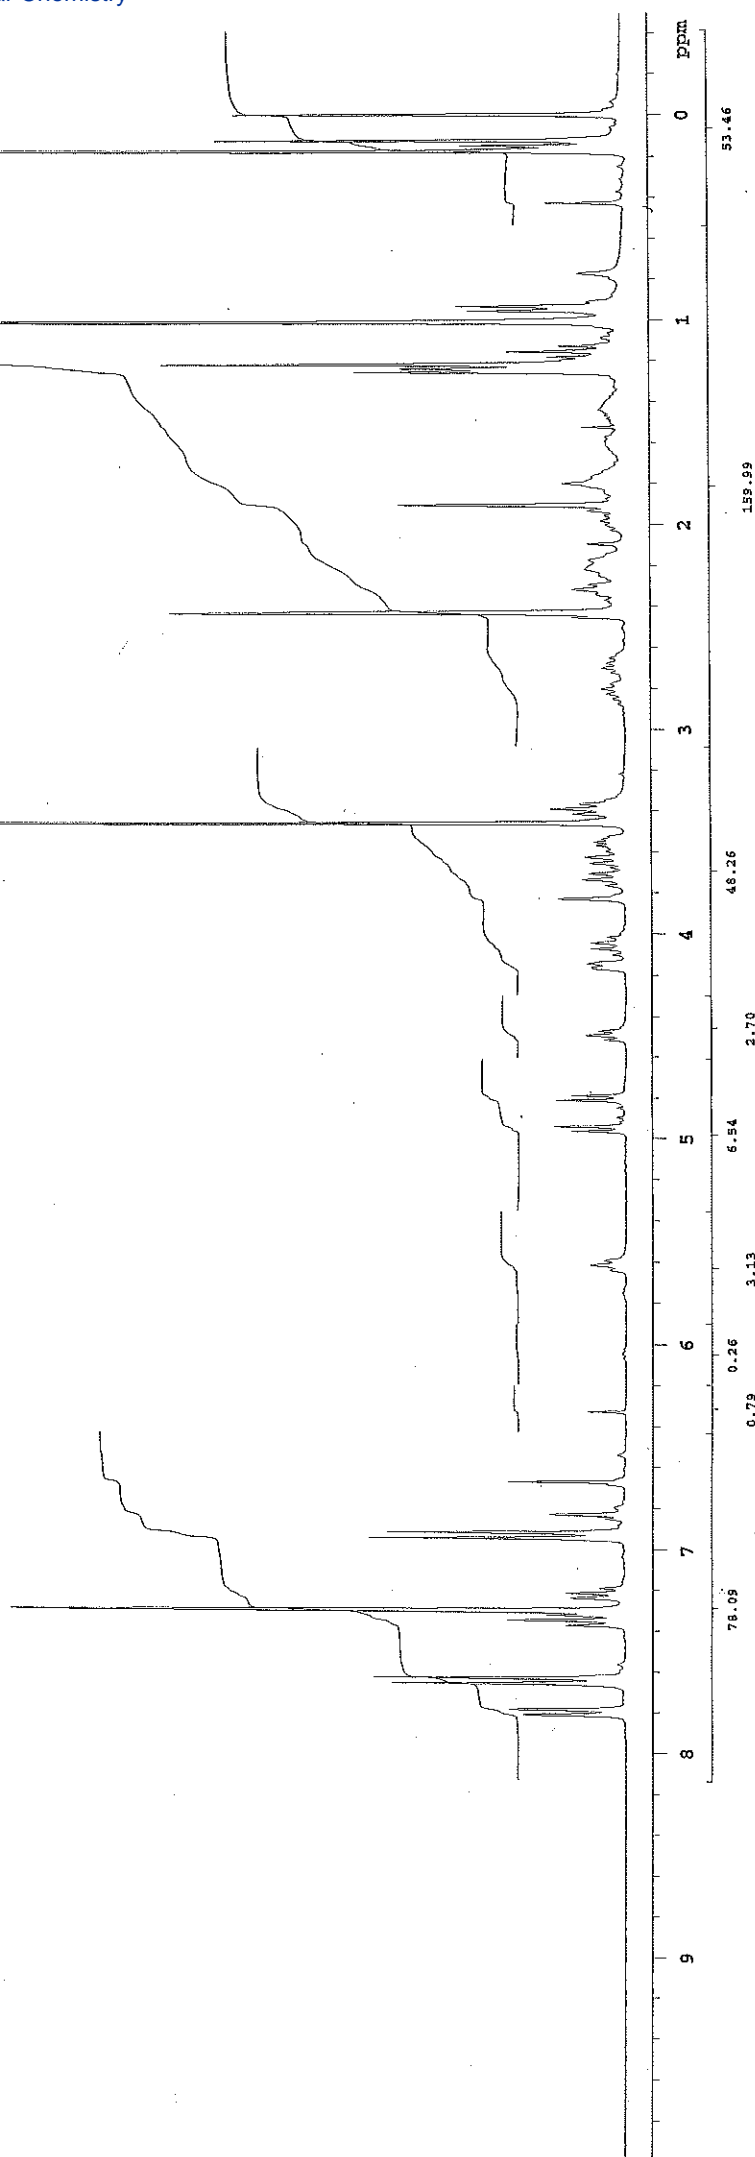

aldol in c6d6  
 13C OBSERVE

Solvent: C6D6  
 Ambient temperature  
 Sample #27  
 File: 2701  
 Queue name Oct03b  
 DATE Oct 3 00  
 INOVA-300 "achos"  
 PULSE SEQUENCE  
 Pulse 45.0 degrees  
 Acq. time 1.638 sec  
 Width 20000.0 Hz  
 4096 repetitions  
 OBSERVE C13, 75.3963205 MHz  
 DECOUPLE H1, 299.8474054 MHz  
 Power 40 dB  
 continuously on  
 MALTZ-16 modulated  
 DATA PROCESSING  
 Line broadening 1.0 Hz  
 FT size 65536  
 Total time 111 minutes

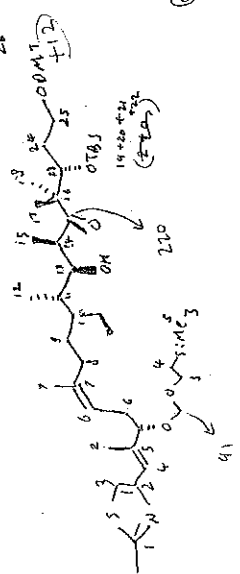

27

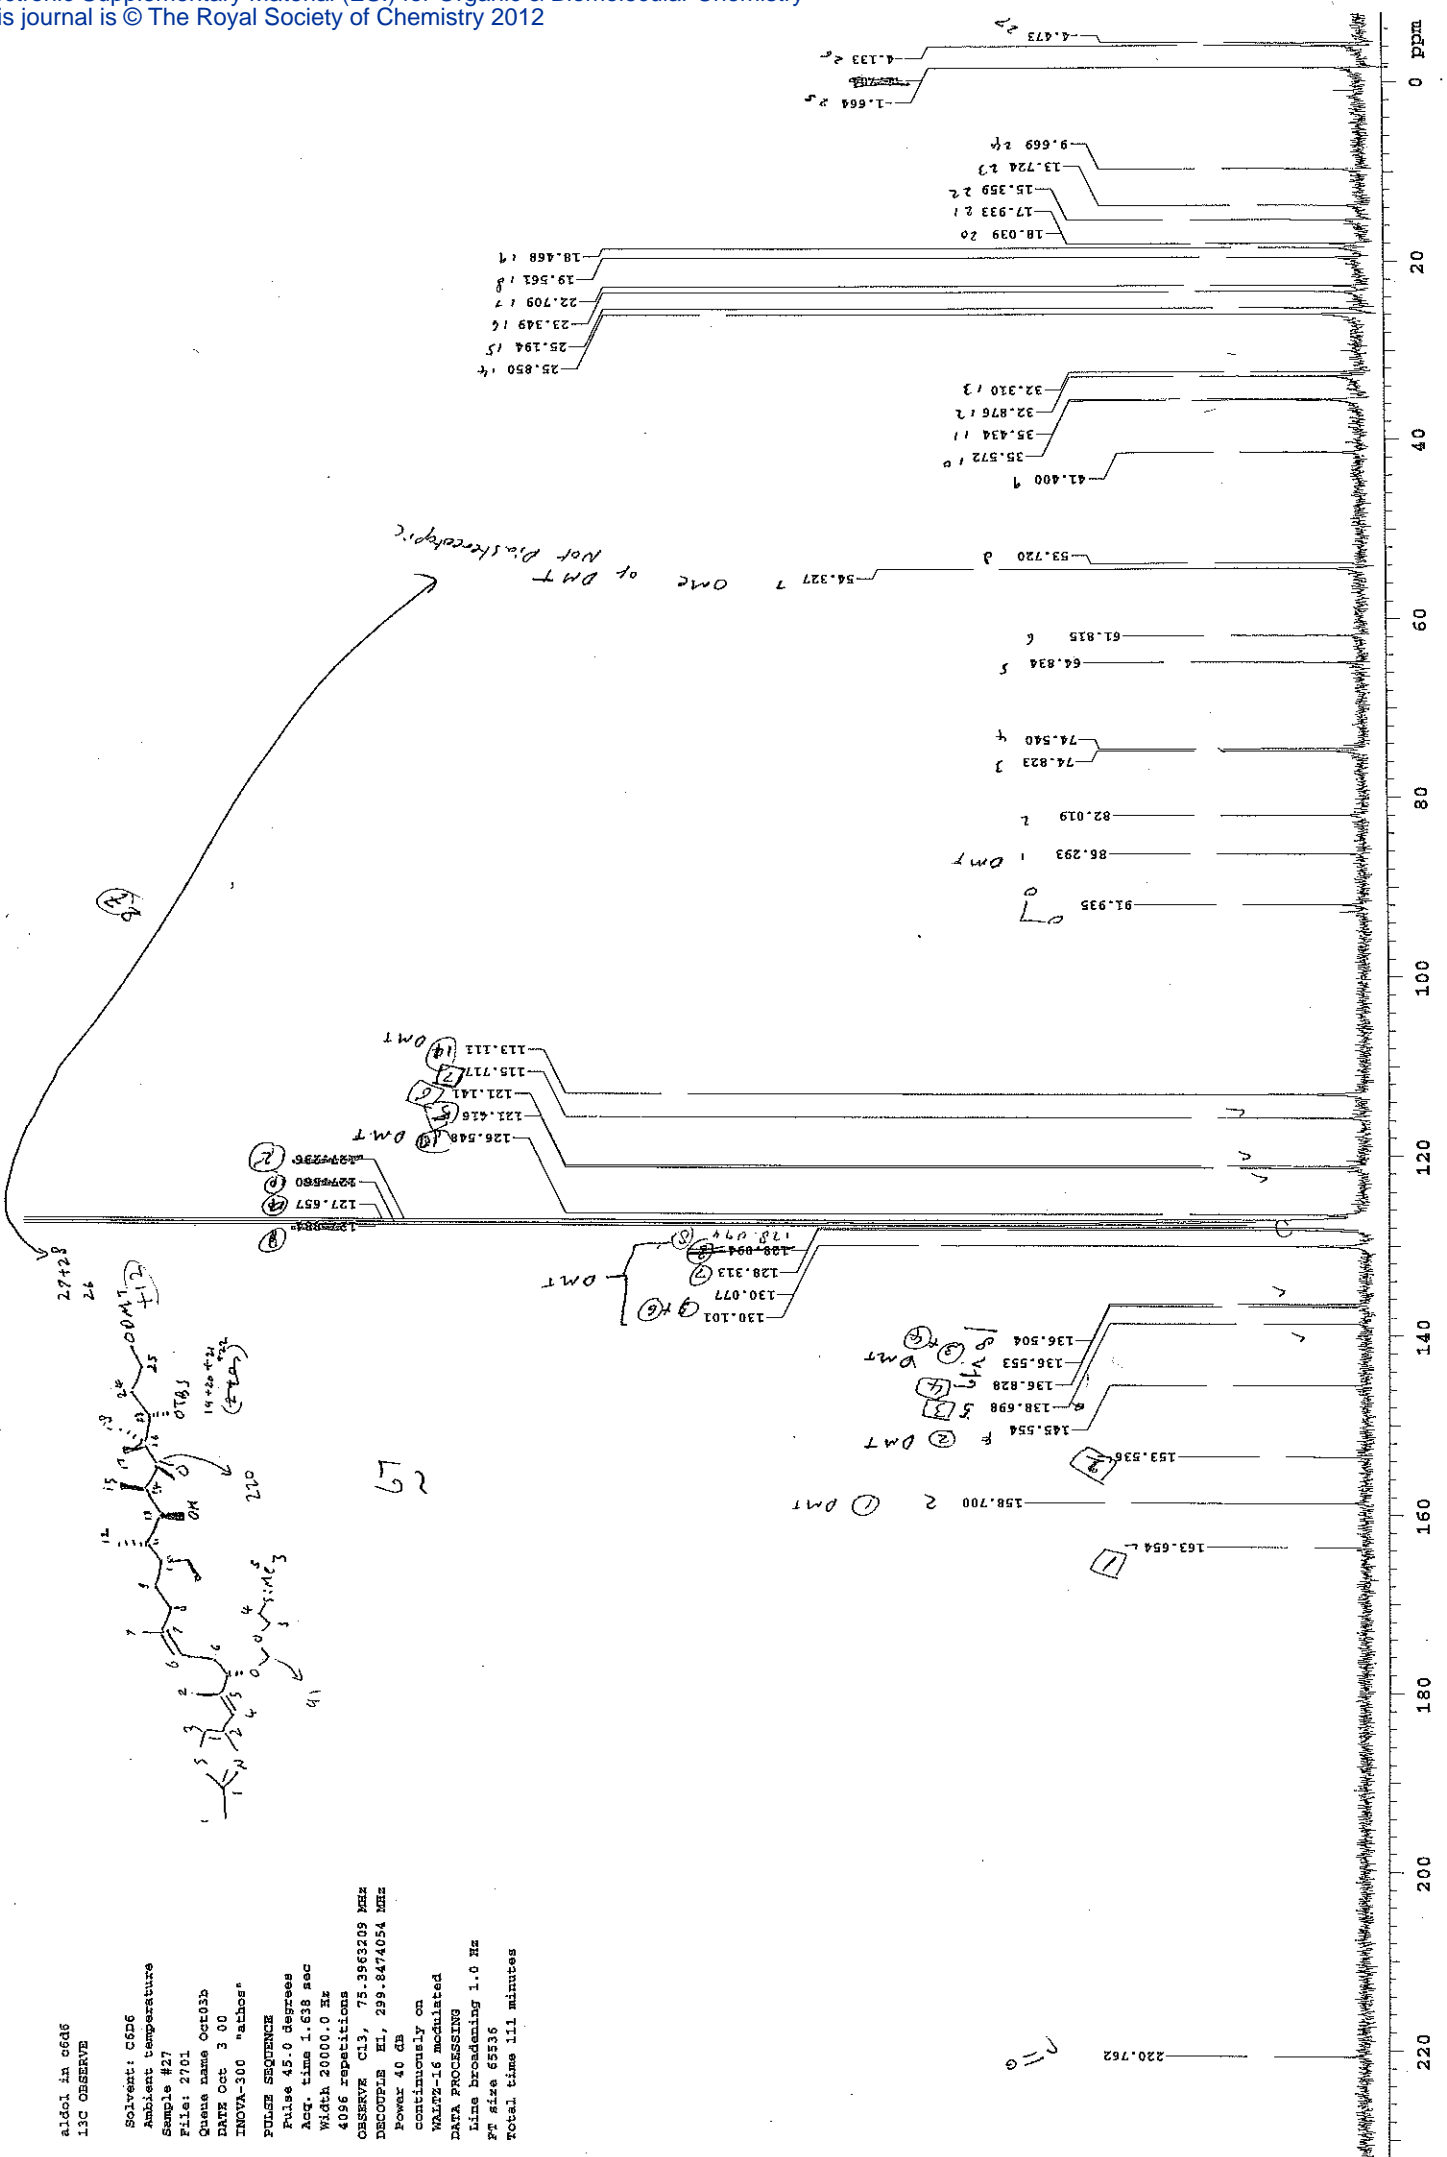

N Martin  
Seco Acid  
cdcl3  
Inova 400 (RS)  
Aramis  
Proton 400MHz  
28.11.00  
567

Pulse Sequence: s2pul

Solvent: cdcl3

Ambient temperature

User: 1-12-87

File: 567-28-11-NM-RS

INOVA-400 "aramis"

PULSE SEQUENCE

Relax. delay 5.000 sec

Pulse 36.0 degrees

Acq. time 4.008 sec

Width 6387.7 Hz

16 repetitions

OBSERVE HL 399.9584369 MHz

DATA PROCESSING

Line broadening 0.2 Hz

FT size 65536

Total time 2 min, 24 sec

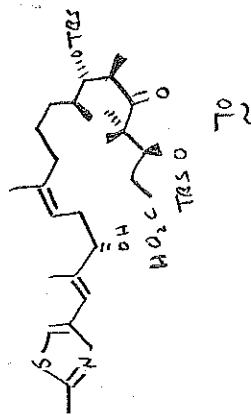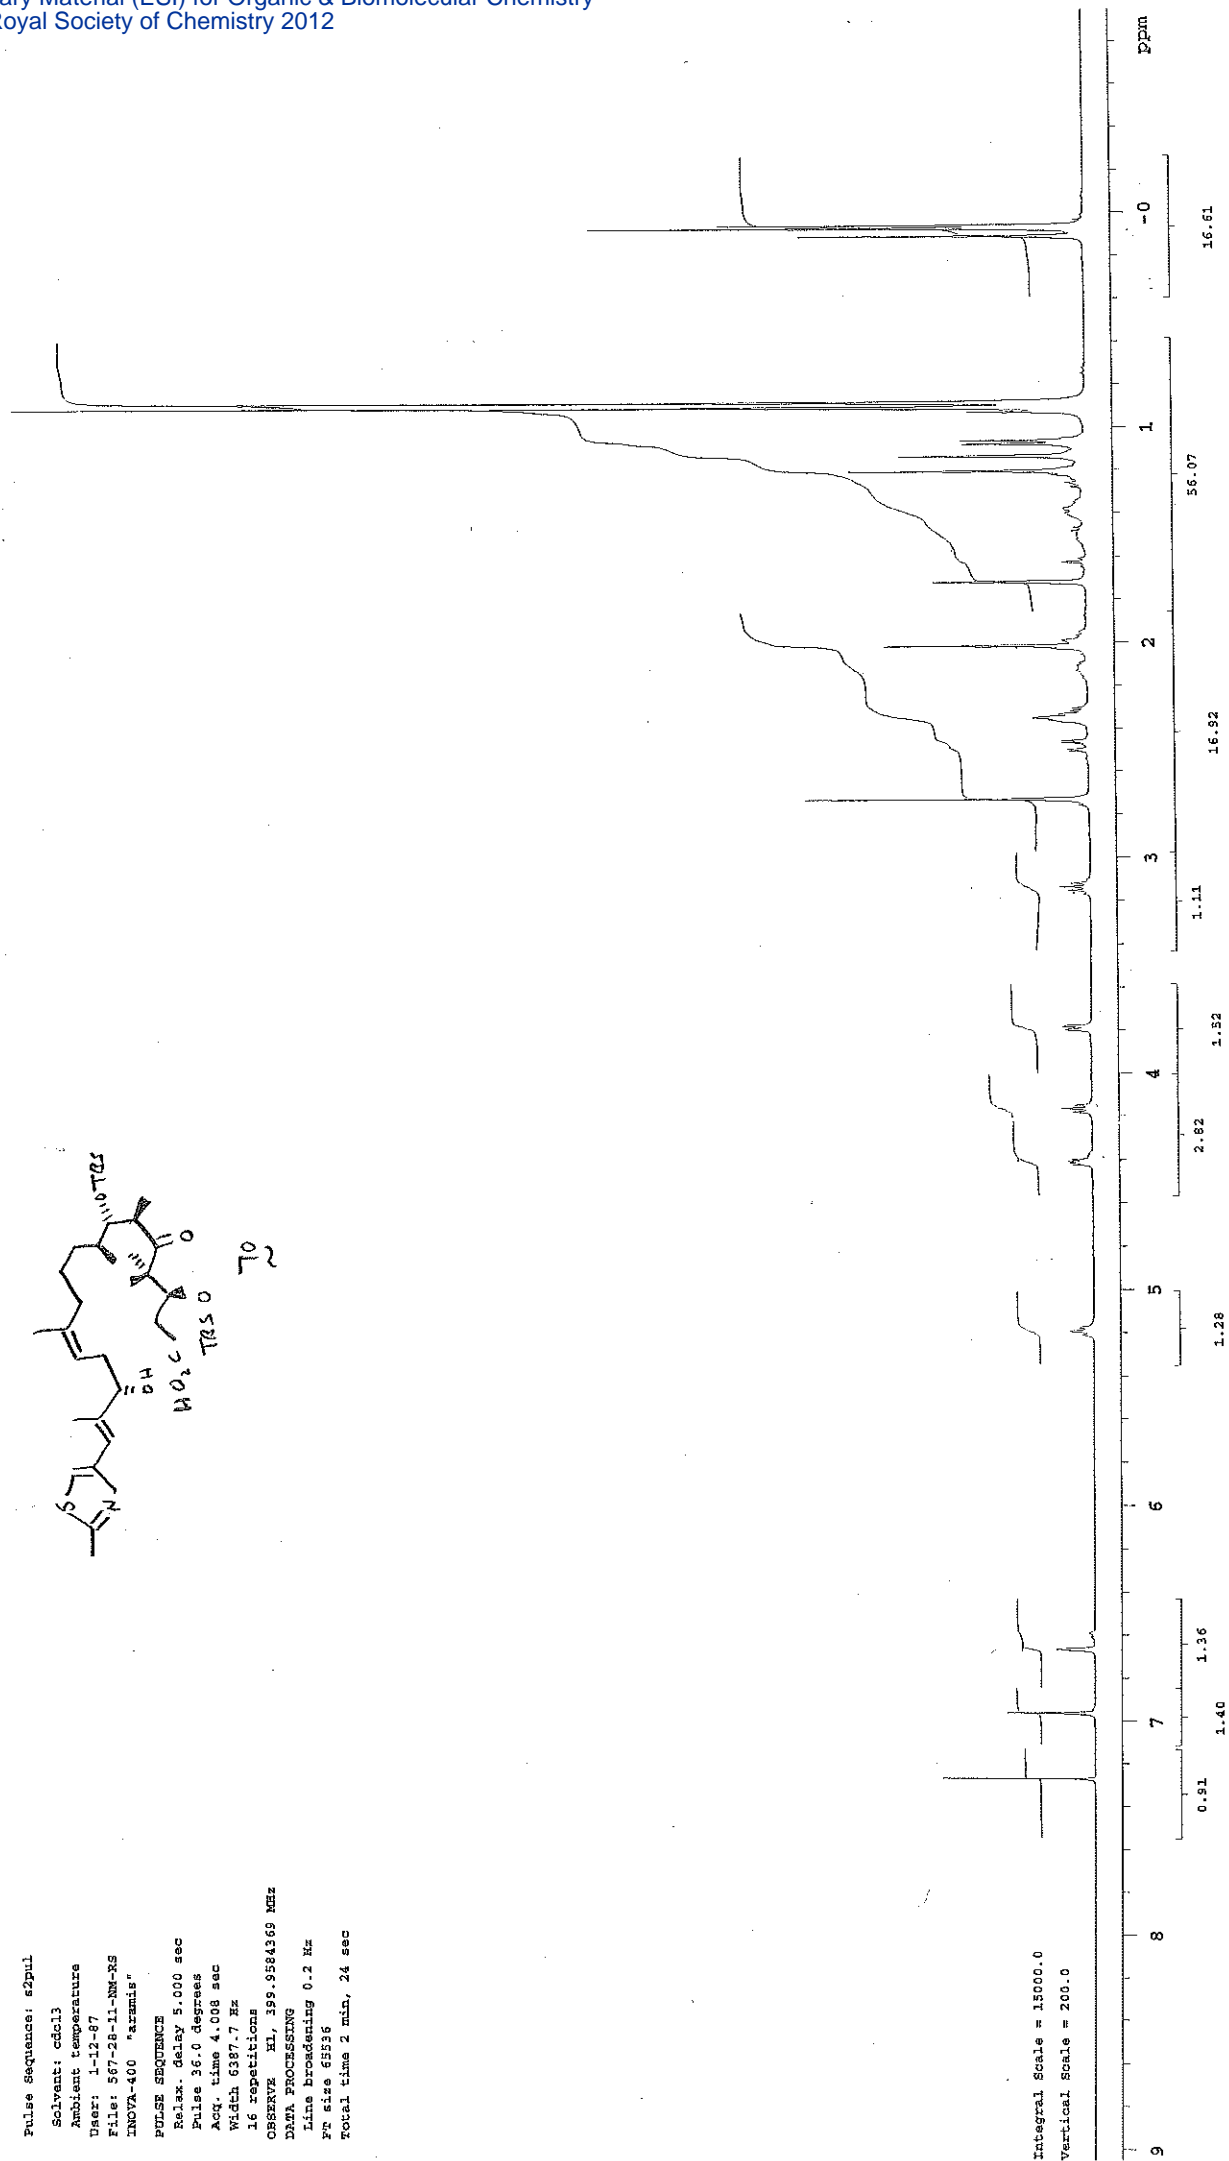

Integral Scale = 15000.0

Vertical Scale = 200.0

SBCO ACID  
 13C OBSERVE

Solvent: CDCl<sub>3</sub>  
 Ambient temperature  
 Sample #2  
 File: 201  
 Queue name Nov24c  
 DATE Nov 25 00  
 INOVA-300 "athos"

PULSE SEQUENCE  
 Pulse 45.0 degrees  
 Acq. time 1.438 sec  
 Width 20000.0 Hz  
 4096 repetitions  
 OBSERVE C13, 75.3963141 MHz  
 DECODE F1, 299.8473785 MHz  
 Power 40 dB  
 continuously on  
 WALTZ-16 modulated  
 DATA PROCESSING  
 Line broadening 1.0 Hz  
 F1 size 65536  
 Total time 111 minutes

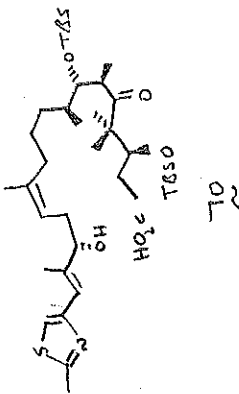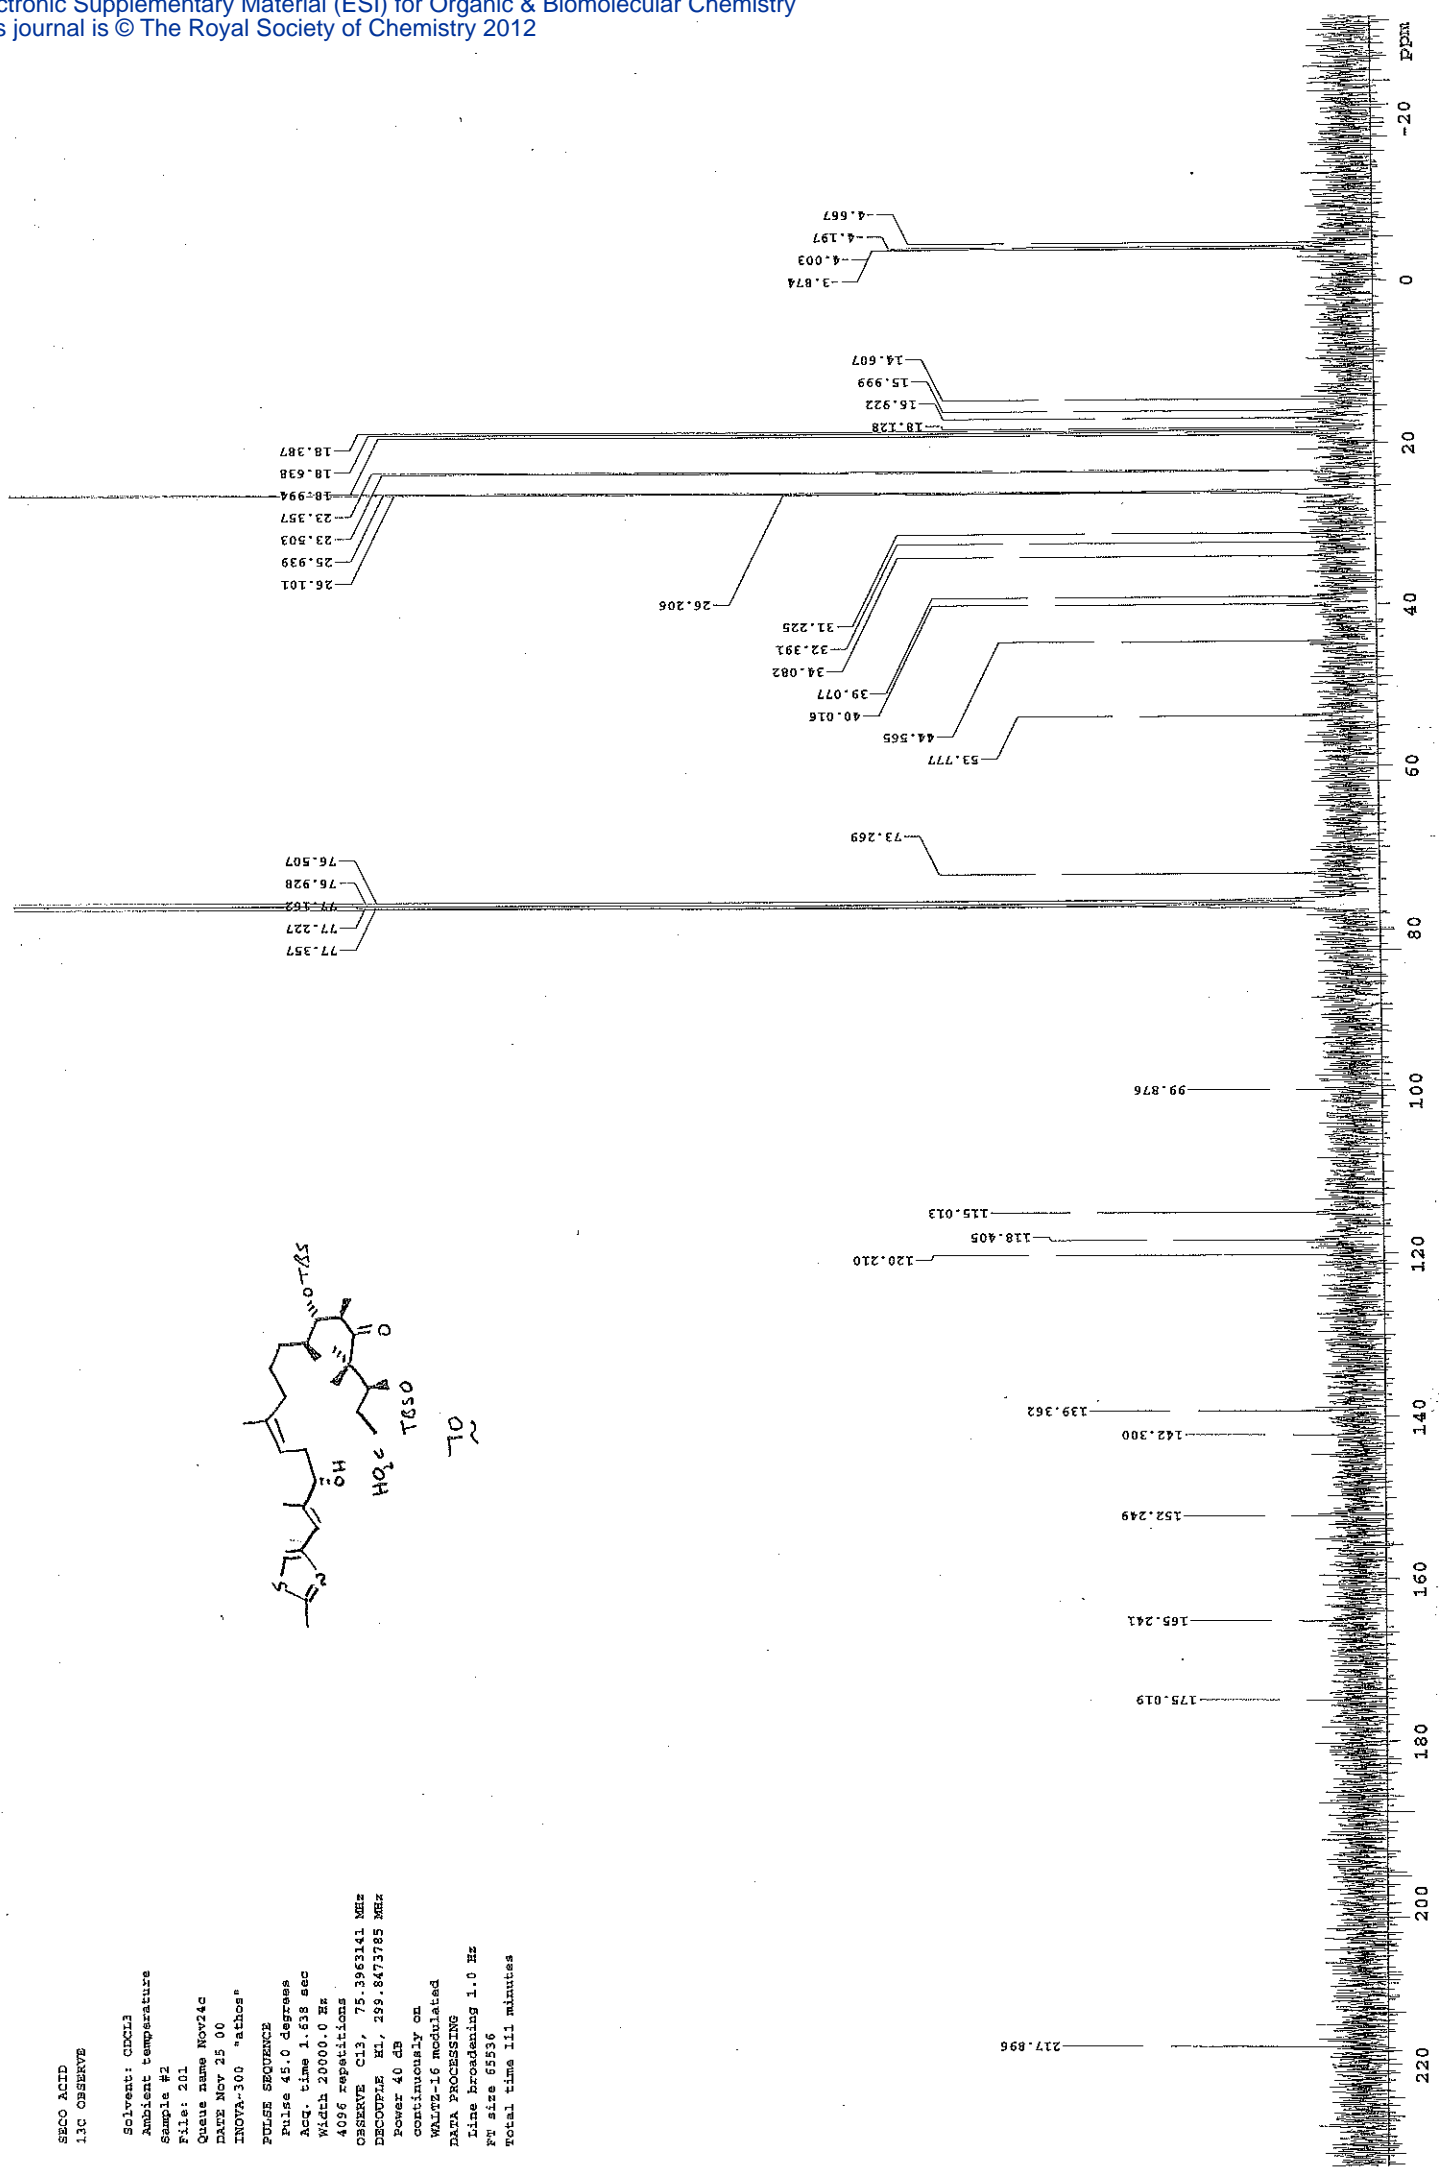

N Martin  
Epo D  
cdcl3  
Unity 500 (PJK)  
Standard H-1 parameters  
5 mm PFG triple probe  
15-01-11  
735

Solvent: cdcl3  
Ambient temperature  
User: 1-15-87  
File: 735  
DATE Jan 15 01  
INOVA-100 "atbos"

PULSE SEQUENCE  
Relax: delay 5.000 sec  
Pulse 101.4 degrees  
Acq. time 4.000 sec  
Width 7000.4 Hz  
16 repetitions  
OBSERVE H1, 499.8462700 MHz  
DATA PROCESSING  
Line broadening 0.3 Hz  
FT size 65536  
Total time 2 minutes

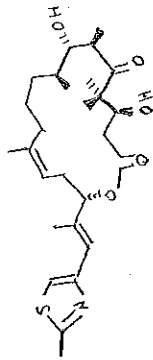

Epothilone D  
3

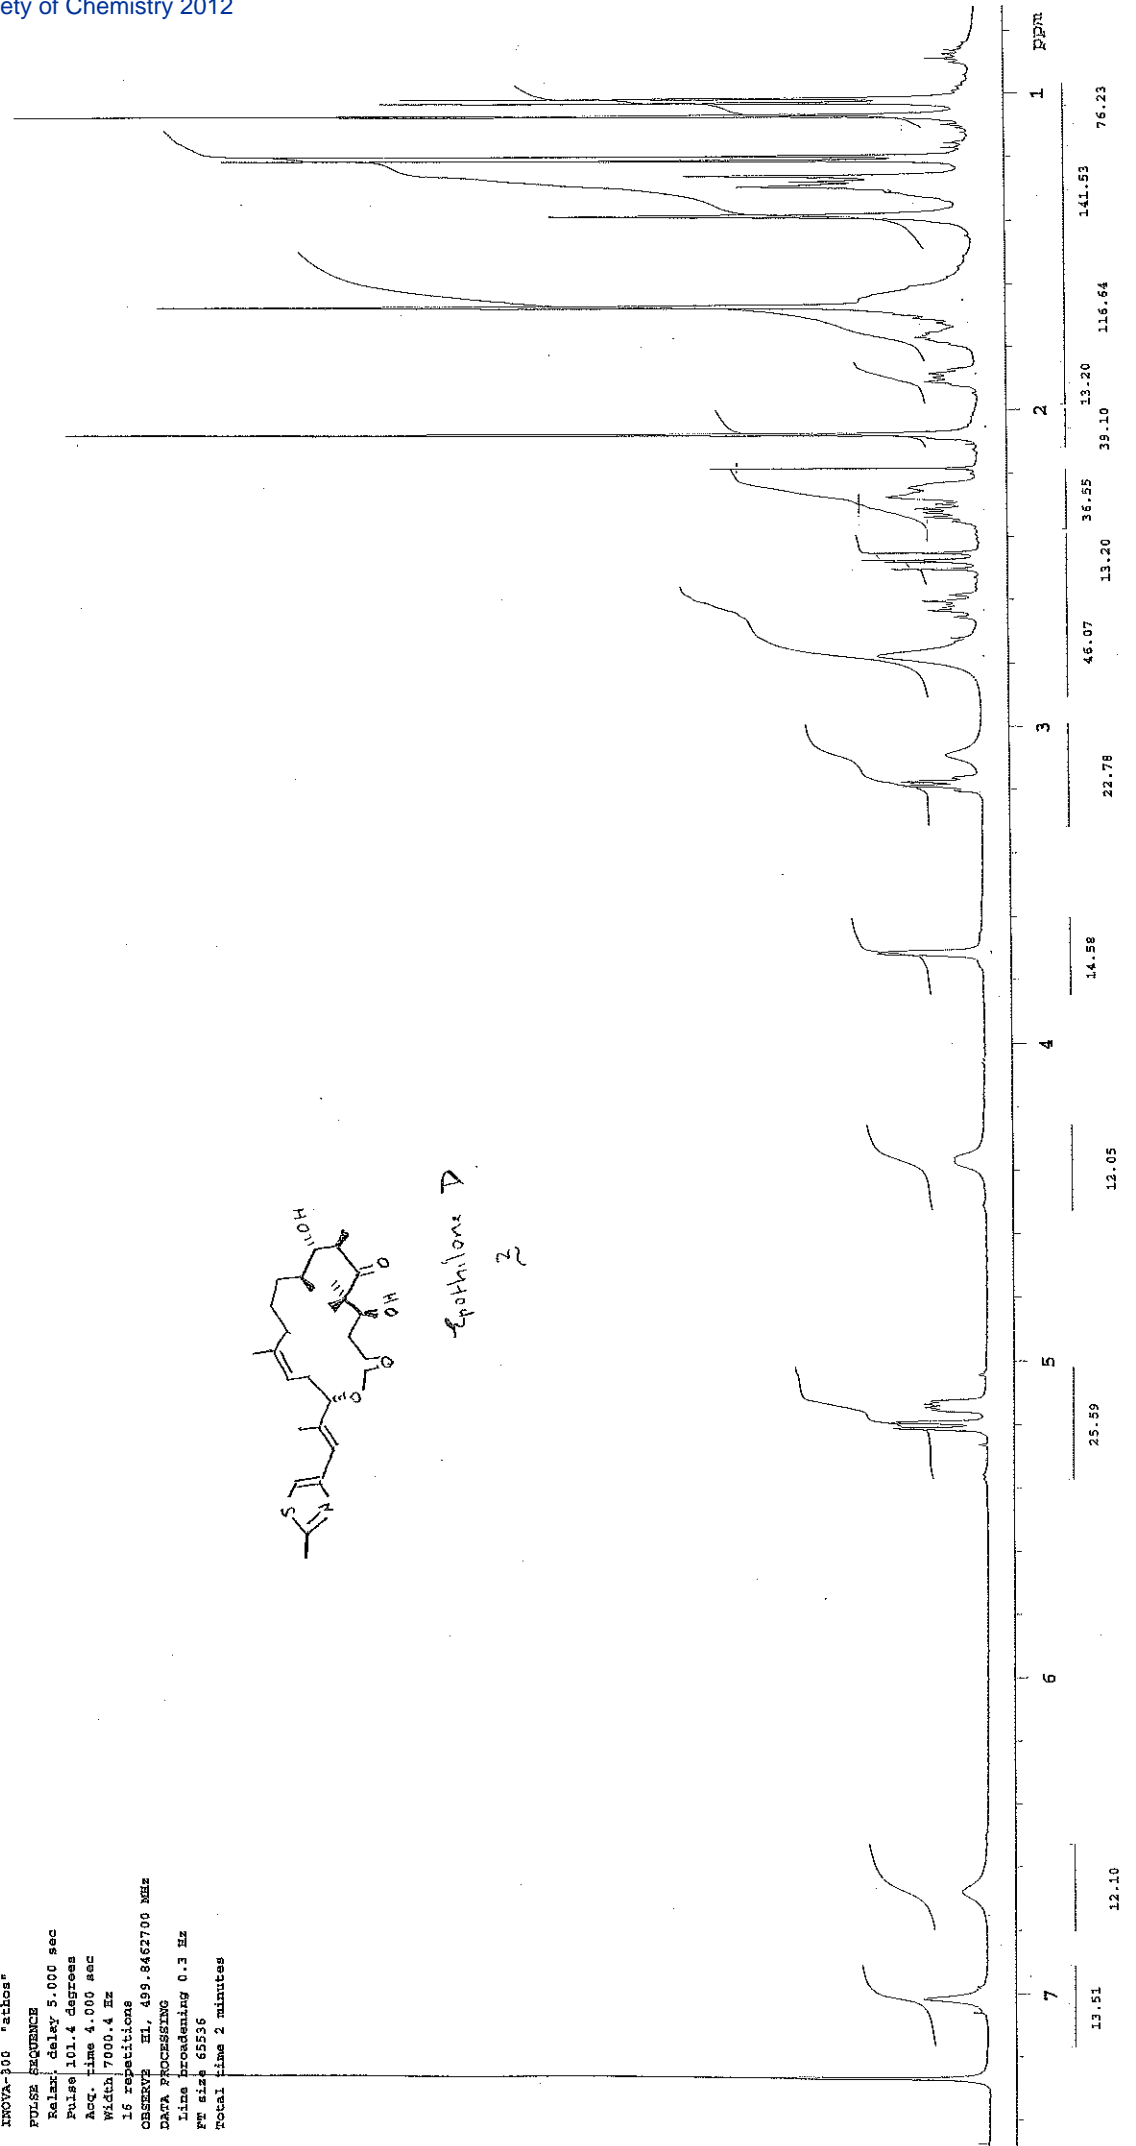

Epothilone D  
13C OBSERVE

Solvent: CDCl3  
Ambient temperature  
Sample #41  
File: 4101  
Queue name Dec07b  
DATE Dec 8 00  
INNOVA-300 "athos"  
PULSE SEQUENCE  
Pulse 45.0 degrees  
Acq. time 1.558 sec  
Width 20000.0 Hz  
4096 repetitions  
OBSERVE C13, 75.3963141 MHz  
DECOUPLE H1, 299.8473785 MHz  
Power 40 dB,  
continuously on  
WALTZ-16 modulated  
DATA PROCESSING  
Line broadening 1.0 Hz  
FT size 65536  
Total time 111 minutes

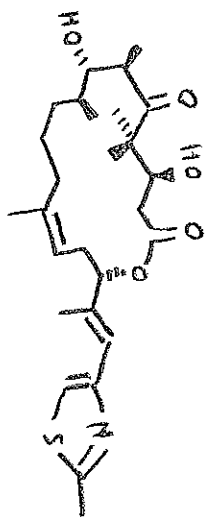

Epothilone D

2

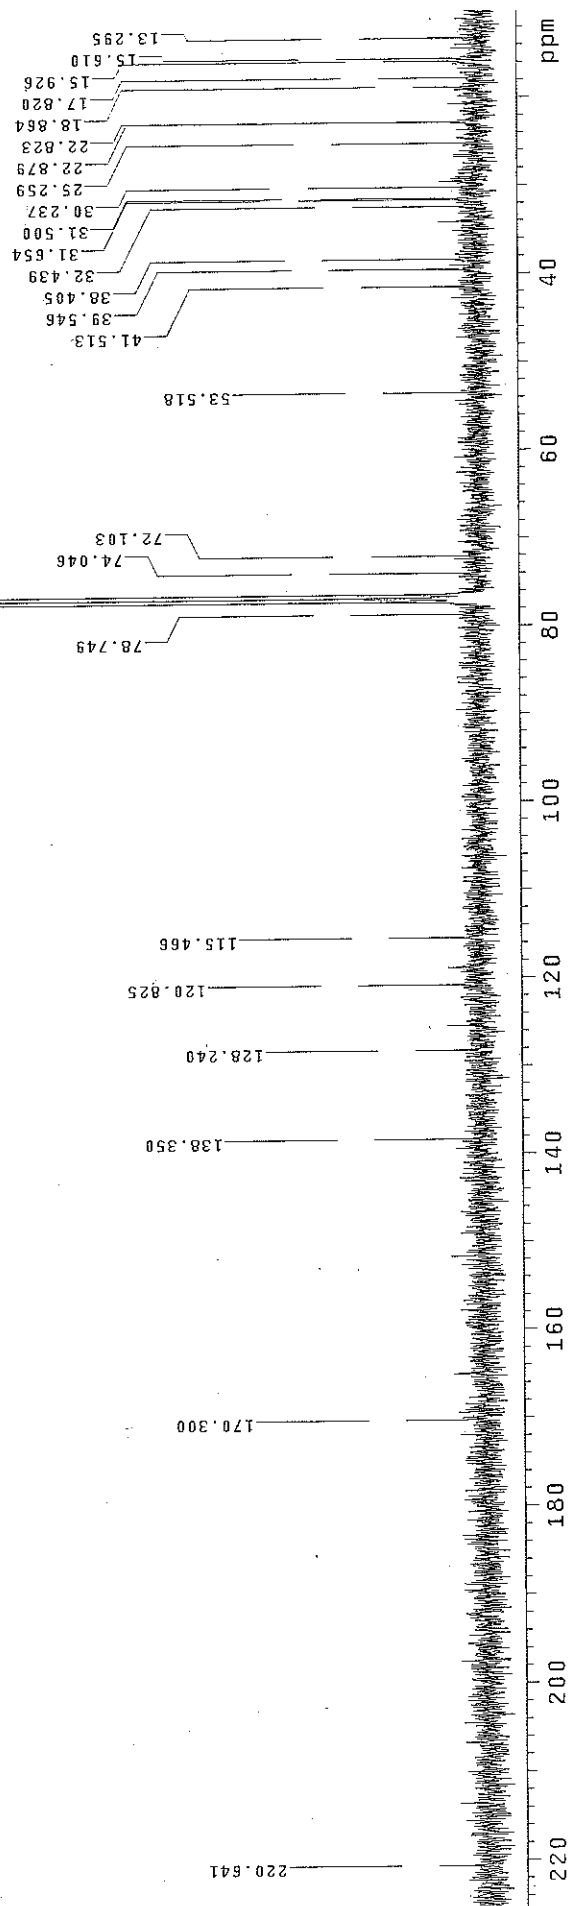

N Martin  
Epo B  
cdcl3  
Unity 500(PUK)  
Standard F-1 parameters  
5 mm PFG Triple probe  
15-01-01  
788  
Solvent: cdcl3  
Ambient Temperature  
User: 1-15-87  
File: 788  
DATE Jan 15 01  
INOVA-300 "athos"  
PULSE SEQUENCE  
Relax. delay 5.000 sec  
Pulse 101.4 degrees  
Acq. time 4.000 sec  
Width 7000.4 Hz  
16 repetitions  
OBSERVE EL, 499.8462700 MHz  
DATA PROCESSING  
Line broadening 0.3 Hz  
FT size 65936  
total time 2 minutes

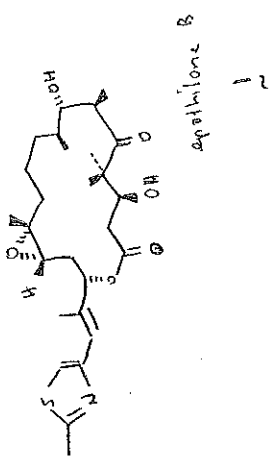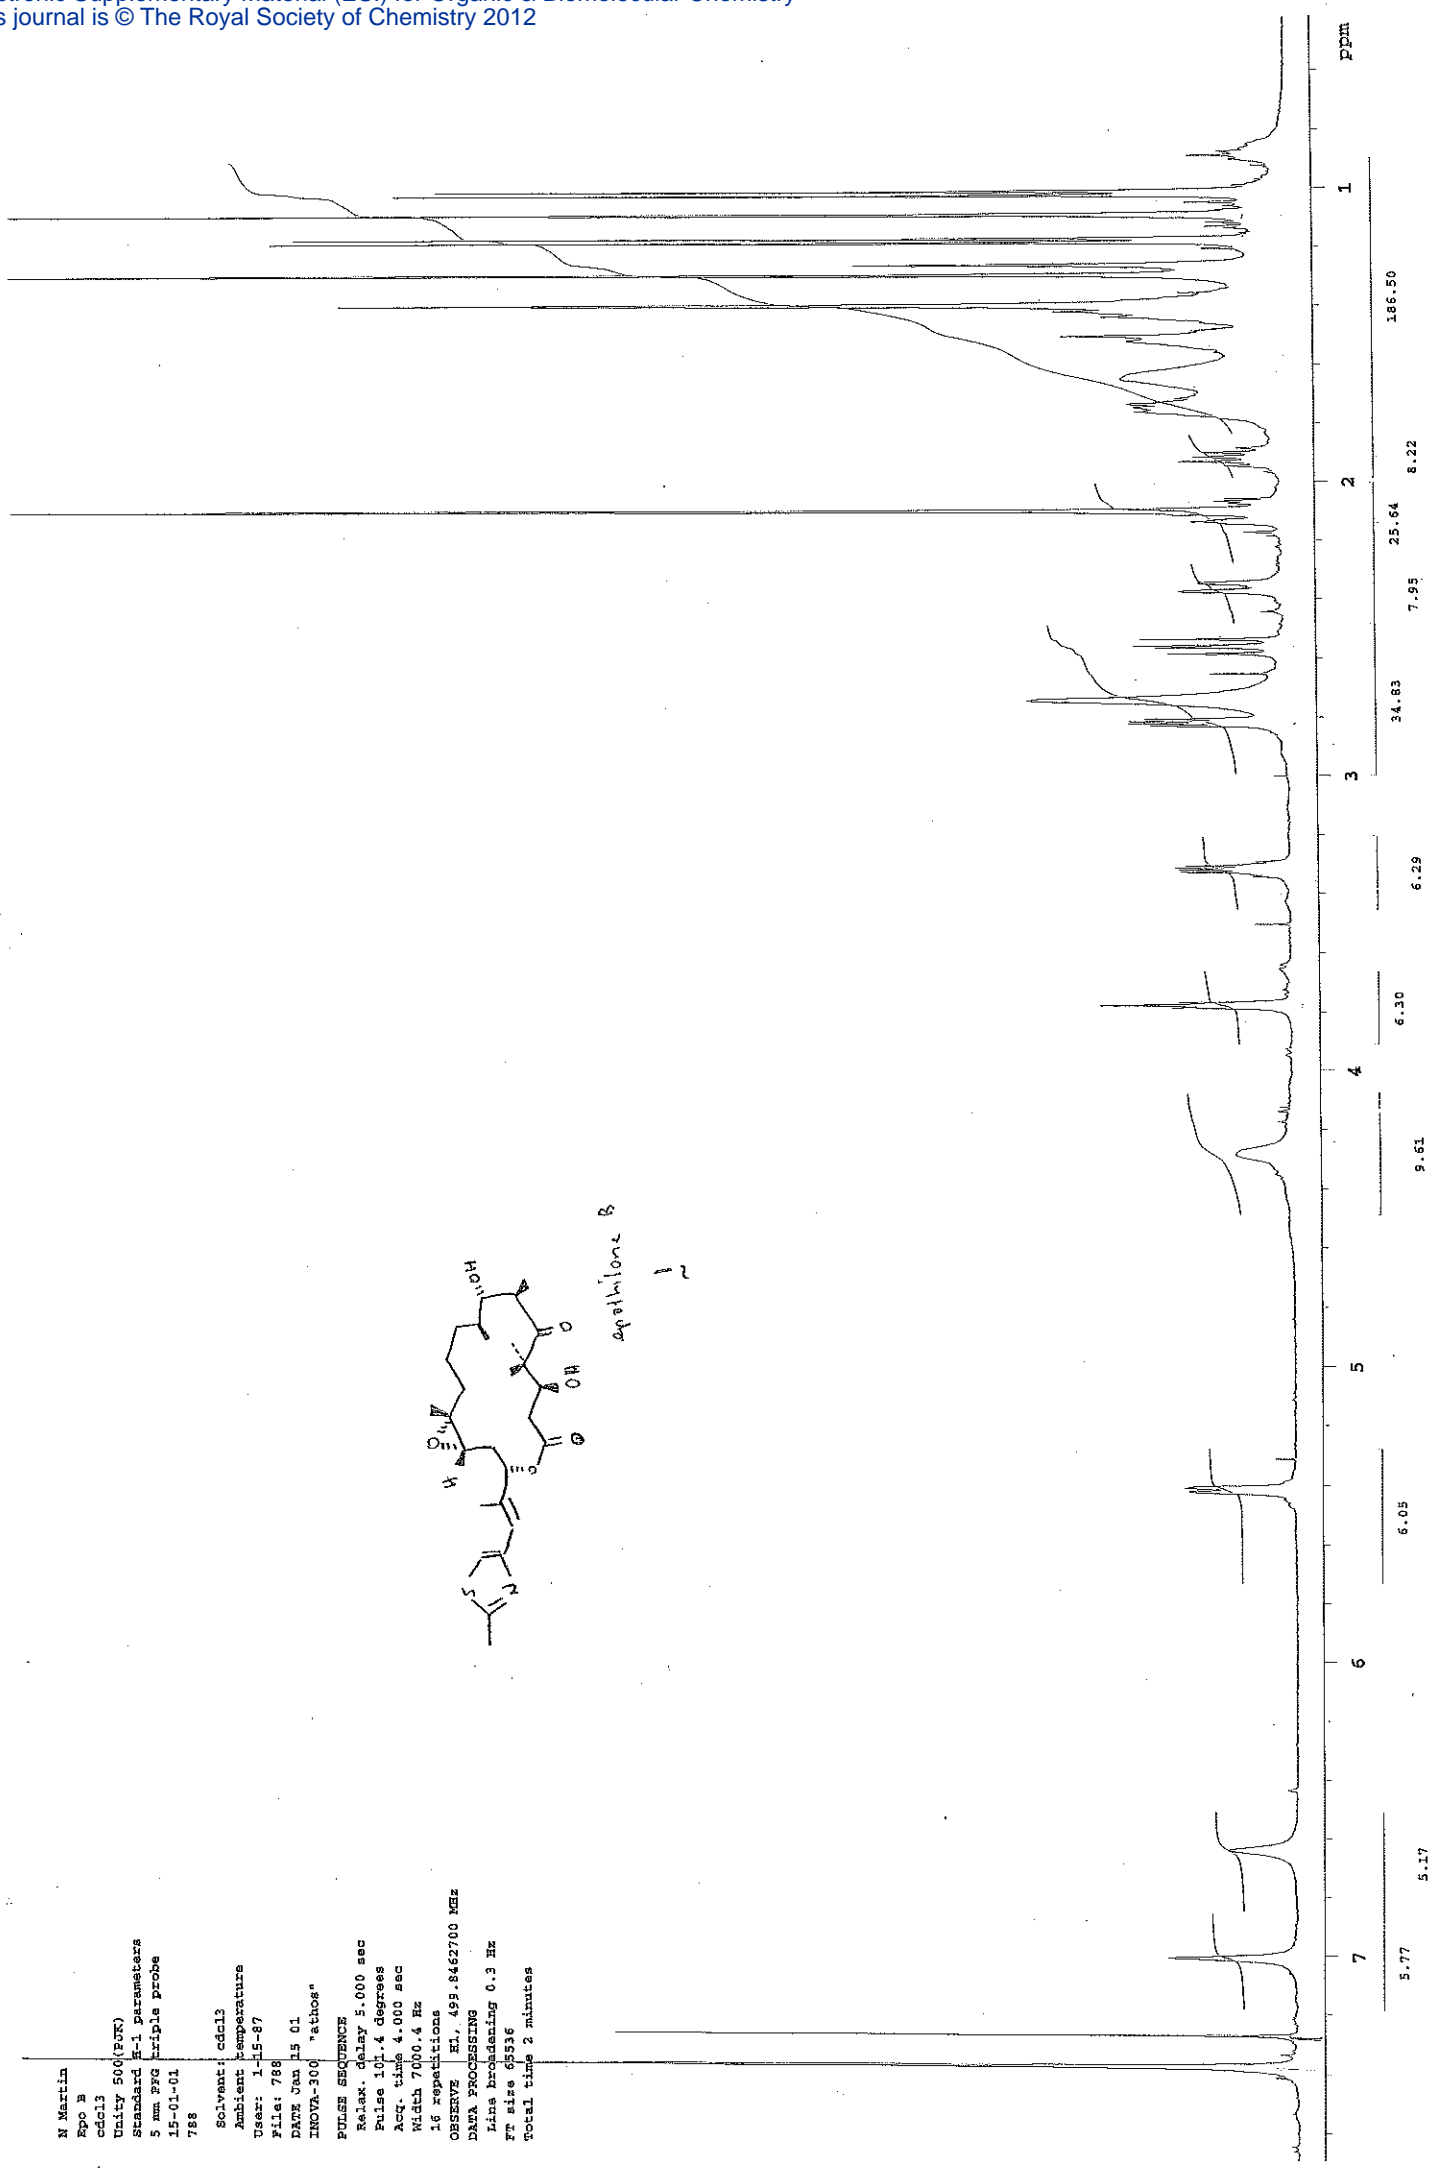

Supplement: c2ob26310f.pdf [file c2ob26310f.pdf]
